# Supplementary material for: A game-theoretic model for the classification of selected oil companies’ price changes
Source: PeerJ Comput Sci. 2023 Jan 25;9:e1215. doi: 10.7717/peerj-cs.1215 (PMC10280626; doi:10.7717/peerj-cs.1215)
Supplement: Supplemental Information 3 [file peerj-cs-09-1215-s003.xlsx]

## Sheet: Sheet1
	Date	OMV	SNPron	SNPusd	Brent	Exxon	Crude	OMVusd	CursDolRon	CresteRON	CresteUSD	CresteExxon	Creste_OMVusd
0	2002-01-14	1.61591	0.0229	0.00707	19.78	24.3441	18.89	8.5	3.207	0	0	0	0
1	2002-01-17	1.62254	0.0216	0.00671	18.41	24.3441	17.97	8.25	3.2355	0	0	1	0
2	2002-01-30	1.6937	0.0227	0.0071	18.79	24.3756	19.08	8.05	3.2183	1	1	1	0
3	2002-02-05	1.7602	0.0279	0.00867	19.56	24.1488	20.07	8.26	3.2165	1	1	0	1
4	2002-02-08	1.77454	0.0264	0.00824	19.72	24.267	20.26	8.68	3.2105	0	0	1	1
5	2002-02-20	1.84177	0.0268	0.00834	19.86	24.7106	20.29	9.28	3.238	1	1	1	1
6	2002-02-21	1.857	0.0268	0.00828	20.37	24.812	20.95	9.12	3.255	1	0	1	0
7	2002-02-28	1.74586	0.0268	0.00823	21.33	26.1747	21.74	8	3.2593	1	0	1	0
8	2002-03-01	1.7611	0.0268	0.00824	21.89	26.6183	22.4	8.4	3.2599	1	1	1	1
9	2002-03-07	1.79247	0.0279	0.00856	23.3	27.1823	23.71	8.75	3.268	1	1	1	1
10	2002-03-14	1.84624	0.0279	0.00853	24.06	27.4042	24.56	8.88	3.2715	1	0	1	1
11	2002-03-25	1.90898	0.029	0.00878	25.13	27.157	24.99	9.43	3.2992	1	1	0	1
12	2002-03-26	1.89553	0.0296	0.00896	25.31	27.721	25.36	8.68	3.294	1	1	1	0
13	2002-03-27	1.91775	0.0301	0.00914	25.44	27.8541	25.87	9.43	3.296	1	1	1	1
14	2002-04-02	1.98731	0.0306	0.0093	27.66	28.1267	27.71	9.87	3.2835	1	1	1	1
15	2002-04-03	1.96812	0.0312	0.0095	27.27	27.6894	27.56	9.82	3.279	1	1	0	0
16	2002-04-09	1.89929	0.0312	0.00948	26.08	27.0746	25.82	9.61	3.291	1	0	0	0
17	2002-04-16	1.91793	0.0361	0.01092	24.58	26.7957	24.75	9.25	3.3102	1	1	0	0
18	2002-04-17	1.93407	0.0373	0.01126	25.38	26.7577	25.94	9.25	3.3155	1	1	0	1
19	2002-04-23	1.8821	0.0478	0.0143	26	26.2063	26.62	9.39	3.3316	1	1	0	1
20	2002-04-30	1.87313	0.0553	0.01655	26.47	25.4585	27.29	9.5	3.3415	1	1	0	1
21	2002-05-07	1.8371	0.0588	0.01761	25.41	24.7804	26.63	9.5	3.337	1	1	0	1
22	2002-05-08	1.83728	0.06	0.01798	26.03	25.3571	27.85	9.5	3.3325	1	1	1	1
23	2002-05-13	1.81415	0.0571	0.01709	26.58	25.5037	28.38	9.2	3.344	0	0	1	0
24	2002-05-16	1.80053	0.0536	0.016	26.22	25.6694	27.95	9.12	3.3505	0	0	1	0
25	2002-05-21	1.83978	0.0553	0.01653	25.6	25.3507	27.33	9.3	3.3555	1	1	0	1
26	2002-05-22	1.79247	0.0565	0.01685	25.5	25.7714	26.37	9	3.351	1	1	1	0
27	2002-05-23	1.76558	0.0577	0.01722	25.39	26.071	26.15	9	3.359	1	1	1	1
28	2002-05-24	1.78189	0.0577	0.01718	25.18	25.6439	25.88	9.27	3.3565	1	0	0	1
29	2002-05-28	1.83728	0.0553	0.01647	24.76	25.3953	25.27	9	3.3565	0	0	0	0
30	2002-05-29	2.50594	0.0548	0.01631	25.12	25.6886	25.76	9	3.3507	0	0	1	1
31	2002-05-30	2.50594	0.0542	0.01617	24.05	25.083	24.67	9	3.3555	0	0	0	1
32	2002-05-31	2.43862	0.0542	0.01616	24.45	25.4527	25.31	9	3.3522	1	0	1	1
33	2002-06-06	2.53261	0.0524	0.01575	24.22	24.9555	24.79	9.12	3.3303	0	0	0	1
34	2002-06-07	2.53236	0.0524	0.01572	23.99	25.1276	24.75	9.25	3.3345	1	0	1	1
35	2002-06-18	2.51229	0.0536	0.01602	24.79	25.4527	25.43	9.25	3.347	1	1	1	1
36	2002-06-26	2.54912	0.0507	0.01516	25.24	25.1467	26.76	10	3.341	0	0	0	1
37	2002-06-27	2.53591	0.0507	0.01517	25.45	25.6567	26.86	10	3.3495	1	1	1	1
38	2002-07-01	2.54023	0.0472	0.01409	25.64	25.9117	26.81	10	3.3355	0	0	1	1
39	2002-07-02	2.42719	0.0483	0.0145	25.75	25.5993	26.77	9.8	3.3325	1	1	0	0
40	2002-07-03	2.45869	0.046	0.01381	25.84	25.44	26.8	9.62	3.3245	0	0	0	0
41	2002-07-08	2.51965	0.0466	0.01403	25.08	25.7268	26.07	9.88	3.3178	1	1	1	1
42	2002-07-09	2.52118	0.0466	0.0141	25.17	25.3698	26.09	10	3.3075	1	1	0	1
43	2002-07-10	2.44675	0.0466	0.0141	25.93	24.3691	26.77	9.62	3.3	1	1	0	0
44	2002-07-11	2.42592	0.0448	0.01359	25.96	23.6488	26.83	9.62	3.309	0	0	0	1
45	2002-07-15	2.4691	0.0466	0.01408	26.06	22.7882	27.07	9.88	3.2984	1	1	0	1
46	2002-08-05	2.23413	0.0472	0.01432	24.89	20.7166	26.58	8.62	3.298	1	1	0	0
47	2002-08-06	2.1973	0.0501	0.0152	25.53	21.2903	27.17	8.5	3.316	1	1	1	0
48	2002-08-21	2.28367	0.0507	0.01531	27.41	23.3774	29.24	8.93	3.3035	1	1	1	1
49	2002-08-22	2.28494	0.0513	0.01551	27.02	23.7559	28.84	8.75	3.312	1	1	1	0
50	2002-08-27	2.29637	0.0524	0.01581	27.22	23.6725	28.83	9	3.321	1	1	0	1
51	2002-09-16	2.18511	0.0687	0.02081	28.52	22.0687	29.67	8.5	3.311	1	1	0	0
52	2002-09-17	2.16936	0.0716	0.02164	27.97	21.2155	29.08	8.38	3.321	1	1	0	0
53	2002-09-18	2.13379	0.0705	0.02121	28.32	21.2989	29.48	8.32	3.3195	0	0	1	0
54	2002-09-30	2.16936	0.0757	0.02291	28.75	20.4649	30.45	8.55	3.305	1	1	0	1
55	2002-10-11	2.17037	0.0763	0.02298	27.99	22.1585	29.37	8.25	3.3185	1	1	1	0
56	2002-11-15	2.33676	0.0775	0.02307	23.35	22.5048	25.51	9.4	3.357	1	1	1	1
57	2002-11-26	2.39391	0.074	0.02197	24.85	21.9301	26.4	9.25	3.3565	0	0	0	0
58	2002-12-18	2.33193	0.0705	0.02085	28.49	22.9504	30.44	9.32	3.373	0	0	1	1
59	2003-01-10	2.33701	0.0775	0.02298	29.67	22.7567	31.68	9.81	3.3735	1	1	0	1
60	2003-01-21	2.40052	0.0746	0.02232	30.74	21.9042	34.61	9.95	3.3435	0	0	0	1
61	2003-01-22	2.42846	0.0746	0.02231	30.34	21.6266	32.85	10.5	3.332	1	0	0	1
62	2003-01-27	2.43481	0.0716	0.02149	29.86	20.5482	32.29	10.25	3.3157	0	0	0	0
63	2003-03-24	2.54023	0.0617	0.01819	26.09	22.9566	28.66	10.75	3.3778	0	0	1	1
64	2003-03-25	2.52372	0.0617	0.01831	24.81	23.1906	27.97	10.75	3.3825	1	1	1	1
65	2003-03-26	2.54785	0.0612	0.01809	25.29	23.3141	28.63	10.88	3.3639	0	0	1	1
66	2003-03-27	2.53998	0.0612	0.01819	26.82	23.3532	30.37	11	3.363	1	1	1	1
67	2003-03-28	2.51483	0.0617	0.01839	26.35	23.4247	30.16	10.82	3.3335	1	1	1	0
68	2003-03-31	2.51432	0.0629	0.01892	27.18	22.7225	31.04	10.82	3.3271	1	1	0	1
69	2003-04-01	2.60374	0.0658	0.01981	26.36	23.1776	29.78	11.15	3.3268	1	1	1	1
70	2003-04-02	2.67893	0.0676	0.02033	25.21	23.2101	28.56	11.62	3.3739	1	1	1	1
71	2003-04-03	2.6393	0.0699	0.02103	25.5	22.7875	28.97	11.25	3.3798	1	1	0	0
72	2003-04-15	2.70992	0.0676	0.01983	25.2	22.7875	29.29	11.75	3.3791	0	0	1	1
73	2003-04-16	2.6228	0.0681	0.02006	25.02	22.5535	29.18	11.4	3.3624	1	1	0	0
74	2003-05-22	2.66725	0.074	0.02311	25.97	23.5392	28.85	12.13	3.219	1	1	1	1
75	2003-05-28	3.82644	0.0722	0.02256	25.59	23.8666	28.58	11.5	3.2131	0	0	1	0
76	2003-05-29	3.82644	0.0722	0.02265	26.03	23.5523	29.1	11.5	3.1821	1	1	0	1
77	2003-05-30	3.65338	0.0722	0.02265	26.32	23.8338	29.56	11.25	3.234	1	1	1	0
78	2003-06-02	3.83567	0.0722	0.02265	27.38	23.9517	30.71	11.5	3.2289	1	1	1	1
79	2003-06-03	3.94989	0.074	0.0232	27.28	24.2136	30.67	11.75	3.2401	1	1	1	1
80	2003-06-04	3.95144	0.0746	0.02338	26.81	24.4886	30.05	11.9	3.2454	1	1	1	1
81	2003-06-06	4.01448	0.0751	0.02314	27.78	24.4493	31.28	12	3.266	1	0	0	1
82	2003-06-09	4.01448	0.0751	0.02314	27.85	24.5279	31.45	12.22	3.253	1	1	1	1
83	2003-06-10	4.04527	0.0746	0.02284	28.08	24.5803	31.73	12.18	3.2694	0	0	1	0
84	2003-06-25	4.0522	0.0786	0.02411	27.65	24.0041	29.95	12.05	3.2571	1	1	0	0
85	2003-06-26	4.10716	0.0798	0.02428	27.04	24.0303	29.01	12.05	3.3008	1	1	1	1
86	2003-07-01	4.0522	0.0804	0.02463	28.31	23.6898	30.4	12.05	3.2677	1	1	0	1
87	2003-07-09	3.89029	0.0827	0.02518	28.71	23.4802	30.88	11.62	3.2824	1	1	0	0
88	2003-07-14	4.05719	0.0827	0.02526	28.96	23.1136	31.27	11.68	3.2747	1	1	0	1
89	2003-07-21	4.11292	0.081	0.02494	28.69	23.166	31.78	12.25	3.2426	0	0	1	1
90	2003-07-22	4.01874	0.0815	0.02519	27.49	23.3886	30.19	11.7	3.2481	1	1	1	0
91	2003-07-30	3.95334	0.0804	0.02459	28.5	23.1267	30.68	11.75	3.2769	0	0	0	1
92	2003-08-22	4.11486	0.0804	0.02365	29.7	24.0838	31.84	11.88	3.3908	1	0	1	1
93	2003-08-27	4.161	0.081	0.02391	29.18	24.5585	31.21	11.9	3.3912	1	1	1	1
94	2003-09-03	4.12638	0.0821	0.02384	27.74	25.1057	29.49	11.75	3.4325	1	0	1	0
95	2003-09-08	4.07602	0.081	0.02386	27.17	25.3628	28.85	11.9	3.3946	0	1	1	1
96	2003-09-09	4.09563	0.0815	0.02421	27.37	25.1255	29.18	12.12	3.354	1	1	0	1
97	2003-10-15	4.17102	0.0804	0.02416	30.87	25.376	31.77	12.45	3.3319	0	0	1	1
98	2003-10-27	4.12948	0.081	0.02453	28.39	24.8816	29.92	12.5	3.3015	1	1	0	1
99	2003-10-30	4.1533	0.0815	0.02411	27.1	23.9322	28.47	12.75	3.3953	1	0	0	1
100	2003-10-31	4.23023	0.081	0.02387	27.7	24.1168	29.11	12.88	3.4054	0	0	1	1
101	2003-11-03	4.32639	0.0804	0.02337	27.36	24.1827	28.9	13.12	3.4443	0	0	1	1
102	2003-11-06	4.30678	0.0804	0.02319	28.41	23.6816	30.26	12.88	3.4737	1	0	0	0
103	2003-11-07	4.36135	0.0798	0.02301	28.91	23.6086	30.85	13.07	3.4554	0	0	0	1
104	2003-11-17	4.46864	0.085	0.02512	29.05	23.6352	31.73	13.75	3.3985	1	1	1	1
105	2003-11-18	4.59094	0.085	0.02535	30.47	23.3364	33.28	14	3.351	1	1	0	1
106	2003-11-26	4.5571	0.085	0.02526	28.47	24.0866	30.41	14	3.3668	1	0	1	1
107	2003-12-03	4.65287	0.085	0.02554	29.14	24.2592	31.1	14.8	3.3354	1	1	1	1
108	2003-12-15	4.67248	0.0856	0.02594	30.32	25.0958	33.18	15.12	3.295	1	1	1	1
109	2004-01-08	4.76016	0.0874	0.02686	31.08	27.1539	33.98	15.62	3.2399	1	1	1	1
110	2004-01-12	4.78786	0.0845	0.02619	31.76	27.1273	34.72	15.7	3.2313	0	0	0	1
111	2004-02-04	5.15321	0.0961	0.02973	28.88	26.7887	33.1	16.62	3.2262	1	1	0	1
112	2004-02-09	4.94129	0.0856	0.02653	29.11	27.2089	32.83	16.5	3.231	0	0	1	0
113	2004-02-25	5.10513	0.0926	0.0289	31.57	28.4916	35.68	16.75	3.223	1	1	1	1
114	2004-02-26	5.09167	0.0961	0.02978	31.57	28.2644	35.51	16.52	3.2203	1	1	0	0
115	2004-02-27	4.98976	0.0961	0.02987	32.23	28.1709	36.16	16.5	3.1996	1	1	0	0
116	2004-03-04	5.68774	0.0996	0.03043	32.89	27.8903	36.64	18.12	3.2743	1	1	0	1
117	2004-03-11	5.51276	0.1019	0.0313	32.83	27.6231	36.78	17.63	3.2493	1	1	0	0
118	2004-03-25	5.78579	0.1223	0.03715	31.83	26.8883	35.51	18.12	3.2898	1	1	0	1
119	2004-03-26	5.80273	0.1223	0.03675	31.99	27.2156	35.73	18.12	3.3256	1	0	1	1
120	2004-03-29	5.82617	0.1194	0.03585	31.74	27.4494	35.45	18.25	3.3315	0	0	1	1
121	2004-03-30	5.85503	0.1153	0.03455	32.45	27.7567	36.25	18.62	3.3347	0	0	1	1
122	2004-03-31	5.92232	0.1194	0.03577	31.51	27.7834	35.76	18.75	3.3346	1	1	1	1
123	2004-04-01	5.97999	0.1252	0.03763	31.55	27.7367	34.27	18.88	3.3266	1	1	0	1
124	2004-04-02	6.01809	0.1252	0.03729	30.21	27.9972	34.39	18.75	3.3673	1	0	1	0
125	2004-04-05	5.96077	0.1281	0.03778	30.69	28.2244	34.38	18.5	3.3923	1	1	1	0
126	2004-04-21	6.28536	0.1369	0.04011	32.46	28.692	35.73	19.5	3.4276	1	1	1	1
127	2004-05-11	6.13807	0.1392	0.04059	37.36	28.6421	40.06	19	3.4115	1	1	0	0
128	2004-05-12	5.73006	0.1398	0.04111	37.95	28.911	40.77	17.88	3.3945	1	1	1	0
129	2004-05-13	5.67351	0.1392	0.04081	38.49	28.7295	41.08	17.75	3.4194	0	0	0	0
130	2004-05-24	7.92475	0.1502	0.0441	38.17	28.7765	41.72	17.75	3.3902	1	1	1	1
131	2004-06-01	7.42221	0.1502	0.04502	39.08	29.3817	42.33	17.12	3.3325	1	1	1	0
132	2004-06-02	7.63318	0.1514	0.04554	36.86	29.4354	39.96	17.5	3.3429	1	1	1	1
133	2004-06-03	7.63318	0.152	0.04559	36.4	29.2808	39.28	17.5	3.3411	1	1	0	1
134	2004-06-09	7.55369	0.1461	0.04332	35.29	29.2136	37.54	17.38	3.385	0	0	0	0
135	2004-06-10	7.55369	0.1455	0.04306	35.74	29.5699	38.45	17	3.3752	0	0	1	0
136	2004-06-16	7.89031	0.1431	0.04217	35.2	30.0742	37.32	17.68	3.3983	0	0	1	1
137	2004-06-17	8.07051	0.1443	0.04261	36.21	30.1011	38.46	18.12	3.3797	1	1	1	1
138	2004-06-22	8.10975	0.1402	0.04171	35.61	30.1885	38.11	18.62	3.3598	0	0	1	1
139	2004-06-28	8.34193	0.1367	0.04088	33.7	29.8388	36.24	19.38	3.3479	0	0	0	1
140	2004-07-06	8.51578	0.1502	0.04511	37.18	30.3229	39.65	20	3.3226	1	1	1	1
141	2004-07-12	8.95839	0.1508	0.04586	36.63	30.5515	39.5	21	3.2896	1	1	1	1
142	2004-07-13	9.0856	0.149	0.04489	36.69	30.3969	39.44	21	3.3243	0	0	0	1
143	2004-07-19	9.22608	0.1508	0.04575	37.9	30.8608	41.64	21.75	3.2919	1	1	1	1
144	2004-07-20	9.11215	0.1502	0.04549	37.01	30.8608	40.86	20.82	3.3041	0	0	1	0
145	2004-07-30	9.64753	0.1502	0.044	40.03	31.1298	43.8	22.07	3.4243	1	0	1	1
146	2004-08-11	9.35595	0.1431	0.04296	41.57	30.5251	44.8	21.45	3.3286	0	0	0	0
147	2004-08-16	9.43283	0.1396	0.04212	43.67	30.498	46.05	21.88	3.3141	0	0	0	1
148	2004-08-19	9.50438	0.142	0.04273	44.33	30.498	48.7	22.25	3.3192	1	1	1	1
149	2004-09-01	9.83833	0.1325	0.03942	41.47	31.4112	44	22.75	3.3598	0	0	1	1
150	2004-09-07	9.88712	0.1384	0.04071	40.76	31.8914	43.31	22.62	3.3982	1	1	1	0
151	2004-09-20	9.82666	0.139	0.04107	42.91	32.6083	46.35	22.5	3.3781	1	1	1	0
152	2004-09-30	9.83306	0.1366	0.04124	46.38	32.6895	49.64	22.72	3.3125	0	1	1	1
153	2004-10-01	10.1134	0.1396	0.04205	46.62	33.0683	50.12	23.75	3.3213	1	1	1	1
154	2004-10-04	10.3366	0.1378	0.04112	46.19	33.0886	49.91	24	3.35	0	0	1	1
155	2004-10-11	11.013	0.1445	0.04367	50.66	33.677	53.64	25.57	3.3108	1	1	1	1
156	2004-10-26	10.3896	0.1729	0.05366	51.56	33.4065	55.17	25.12	3.2233	1	1	0	0
157	2004-10-28	10.2836	0.1668	0.05194	48.37	32.8789	50.92	24.77	3.2157	0	0	0	0
158	2004-10-29	9.97828	0.1674	0.0523	48.98	33.2915	51.76	24.12	3.1974	1	1	1	0
159	2004-11-01	9.97828	0.1681	0.05254	47.06	33.0209	50.13	24.12	3.2032	1	1	0	1
160	2004-11-02	10.2253	0.1668	0.05254	46.55	32.7571	49.62	24.3	3.176	0	1	0	1
161	2004-11-03	10.3504	0.1681	0.05396	47.56	33.3253	50.88	25.12	3.1086	1	1	1	1
162	2004-11-05	10.9197	0.1626	0.0527	46.42	34.0829	49.61	26.5	3.0896	0	0	1	1
163	2004-11-10	10.9928	0.159	0.05069	44.75	33.7776	48.86	26.55	3.1471	0	0	0	1
164	2004-11-12	10.8296	0.1632	0.05262	42.31	34.2877	47.32	26.5	3.0976	1	1	1	0
165	2004-11-16	10.4108	0.1644	0.0542	42.29	33.6008	46.11	25.5	3.0339	1	1	0	0
166	2004-11-23	11.1848	0.1747	0.05817	44.45	34.8181	48.94	27.5	3.0048	1	1	1	1
167	2004-11-30	10.5195	0.1759	0.06085	45.51	34.8521	49.13	26.38	2.8925	1	1	1	0
168	2004-12-03	11.1762	0.182	0.06533	39.36	34.1857	42.54	28.12	2.7725	1	1	0	1
169	2004-12-07	11.6485	0.1844	0.06486	38.27	33.798	41.46	29.25	2.8491	1	0	0	1
170	2004-12-08	11.6485	0.1874	0.0652	38.69	34.0157	41.94	28.5	2.8758	1	1	1	0
171	2004-12-09	11.3941	0.188	0.06489	39.67	34.2197	42.53	28.12	2.8965	1	0	1	0
172	2004-12-13	11.5728	0.1953	0.06594	37.84	34.4577	41.01	28.5	2.9613	1	1	1	1
173	2004-12-17	11.5298	0.1959	0.06737	43.39	33.8661	46.28	28.7	2.9126	1	1	0	1
174	2004-12-23	11.8993	0.1971	0.06915	40.71	35.3417	44.18	29.75	2.8495	1	1	1	1
175	2005-01-06	11.7148	0.2345	0.07974	42.85	34.0837	45.56	29.25	2.9404	1	1	0	0
176	2005-01-10	11.638	0.2279	0.07719	42.92	33.9885	45.33	29	2.9523	0	0	0	0
177	2005-01-18	11.8871	0.2478	0.08623	45.39	35.0221	48.38	29.25	2.8781	1	1	1	1
178	2005-01-24	11.8421	0.272	0.09239	46.01	34.7705	48.81	29.43	2.9304	1	1	0	1
179	2005-01-25	12.1336	0.2678	0.09207	46.96	34.9065	49.64	29.88	2.908	0	0	1	1
180	2005-01-26	12.343	0.2557	0.08893	46.51	35.1581	48.78	30.25	2.876	0	0	1	1
181	2005-01-28	12.5418	0.2533	0.08752	44.95	34.8657	47.18	31.25	2.8901	0	0	0	1
182	2005-02-01	12.616	0.2539	0.08813	44.82	36.2258	47.12	31.12	2.8816	1	1	1	0
183	2005-02-02	12.369	0.2563	0.08952	44.01	36.6746	46.69	31	2.8627	1	1	1	0
184	2005-02-03	12.2184	0.2575	0.08956	43.85	37.0758	46.45	29.98	2.8677	1	1	1	0
185	2005-02-04	12.4569	0.2587	0.08916	43.89	37.5995	46.48	30.38	2.903	1	0	1	1
186	2005-02-07	12.616	0.2527	0.08674	43.04	37.6743	45.28	30.55	2.926	0	0	1	1
187	2005-02-08	12.6822	0.2406	0.08327	43.07	38.1185	45.4	30.75	2.8907	0	0	1	1
188	2005-02-09	12.5624	0.2388	0.08304	43.13	37.9545	45.46	30.62	2.8748	0	0	0	0
189	2005-02-10	12.643	0.2527	0.08973	44.48	38.5012	47.1	30.82	2.8172	1	1	1	1
190	2005-02-11	12.6531	0.2539	0.09051	44.8	38.344	47.16	30.9	2.8013	1	1	0	1
191	2005-02-14	12.6293	0.266	0.09843	45.53	38.836	47.44	31.1	2.7008	1	1	1	1
192	2005-02-15	13.04	0.266	0.09388	45.39	38.8975	47.26	32.23	2.8475	1	0	1	1
193	2005-02-16	13.1726	0.272	0.09144	46.15	39.9636	48.33	32.25	2.9794	1	0	1	1
194	2005-02-17	13.1142	0.272	0.09635	45.82	39.7244	47.54	32.45	2.8472	1	1	0	1
195	2005-02-18	13.4747	0.272	0.09815	46.34	40.5991	48.35	33.55	2.7767	1	1	1	1
196	2005-02-22	13.1063	0.2896	0.10504	48.62	39.8064	51.15	33	2.769	1	1	0	0
197	2005-02-23	13.1461	0.3174	0.11559	48.51	40.6059	51.17	33.15	2.7705	1	1	1	1
198	2005-02-24	13.4111	0.3083	0.11268	49.44	41.7745	51.39	33.62	2.741	0	0	1	1
199	2005-02-25	13.6761	0.3023	0.11063	49.61	43.2301	51.49	34.12	2.7363	0	0	1	1
200	2005-02-28	13.867	0.2962	0.10786	50.06	43.2643	51.75	34.5	2.7433	0	0	1	1
201	2005-03-01	13.798	0.298	0.10791	50.11	42.4374	51.68	34.4	2.7614	1	1	0	0
202	2005-03-08	14.1479	0.2738	0.10186	52.84	43.1208	54.59	35.27	2.6881	0	0	1	1
203	2005-03-09	13.92	0.2744	0.10208	53.38	41.5422	54.77	35.38	2.6884	1	1	0	1
204	2005-03-10	13.4212	0.2902	0.10795	52.66	41.2551	53.54	35.38	2.6873	1	1	0	1
205	2005-03-14	13.9147	0.2841	0.10537	53.66	41.877	54.95	35.2	2.6974	0	0	1	0
206	2005-03-15	13.4509	0.272	0.10073	53.85	41.2415	55.05	34.12	2.6991	0	0	0	0
207	2005-03-16	13.2521	0.2569	0.09524	54.8	41.2005	56.46	33.75	2.6973	0	0	0	0
208	2005-03-17	13.3607	0.2358	0.0857	55.06	42.0205	56.4	34.12	2.7434	0	0	1	1
209	2005-03-18	12.987	0.2285	0.08405	55.59	42.8132	56.72	33.85	2.7191	0	0	1	0
210	2005-03-21	13.1461	0.2255	0.08154	55.65	42.4715	56.62	33.38	2.7663	0	0	0	0
211	2005-03-23	13.4641	0.2225	0.07978	53.04	41.0638	53.81	32.95	2.7862	0	0	0	0
212	2005-03-24	13.1619	0.2176	0.07697	53.93	40.3189	54.84	32.62	2.829	0	0	0	0
213	2005-03-29	13.1434	0.1971	0.06985	53.03	39.8201	54.23	32.08	2.8222	0	0	0	0
214	2005-03-31	12.9923	0.2122	0.07487	54.29	40.7289	55.4	31.75	2.8302	1	1	1	0
215	2005-04-01	13.2436	0.2176	0.07715	56.51	41.3782	57.27	32.25	2.8434	1	1	1	1
216	2005-04-04	13.5966	0.2188	0.07686	56.23	41.4465	57.01	32.95	2.8397	1	0	1	1
217	2005-04-08	13.8087	0.2116	0.07502	52.89	41.0091	53.32	33.5	2.82	0	0	0	1
218	2005-04-11	13.7715	0.2146	0.07677	53.21	41.2005	53.71	33.88	2.7998	1	1	1	1
219	2005-04-14	13.6364	0.2218	0.07846	50.91	40.1481	51.13	33.5	2.8291	1	1	0	0
220	2005-04-25	12.987	0.185	0.0665	54.4	40.975	54.57	32.12	2.7856	0	0	1	0
221	2005-04-27	12.722	0.1898	0.06811	52.29	39.8952	51.61	30.98	2.7832	1	1	0	0
222	2005-04-28	12.6223	0.191	0.06809	52.48	38.2688	51.77	30.25	2.8047	1	0	0	0
223	2005-04-29	12.669	0.1904	0.06782	51.09	38.9727	49.72	30.75	2.8168	0	0	1	1
224	2005-05-03	12.6212	0.2007	0.07149	50.52	38.6105	49.5	30.75	2.8079	1	1	0	1
225	2005-05-04	12.6716	0.2055	0.07338	50.97	39.1094	50.13	30.75	2.7985	1	1	1	1
226	2005-05-09	12.8943	0.1989	0.07075	51.29	39.6424	52.03	31.38	2.812	0	0	1	1
227	2005-05-10	13.0162	0.1964	0.07012	51.43	39.1094	52.07	31.65	2.8023	0	0	0	1
228	2005-05-11	13.0877	0.1959	0.06929	50.07	39.3498	50.45	31.9	2.83	0	0	1	1
229	2005-05-12	12.934	0.1922	0.0676	48.34	37.6532	48.54	31	2.8478	0	0	0	0
230	2005-05-13	12.6001	0.1953	0.06818	48.66	36.884	48.67	30.25	2.8615	1	1	0	0
231	2005-05-16	12.6001	0.1965	0.06871	48.05	36.6436	48.61	29.88	2.8631	1	1	0	0
232	2005-05-17	12.563	0.1989	0.06959	49.34	36.9939	48.97	30.12	2.8598	1	1	1	1
233	2005-05-18	12.9817	0.1971	0.06906	48.15	36.8496	47.25	30.38	2.8512	0	0	0	1
234	2005-05-19	13.093	0.2068	0.0722	47.88	37.6601	46.92	31.3	2.8609	1	1	1	1
235	2005-05-20	13.5966	0.214	0.07421	48.03	37.0969	46.8	31.75	2.88	1	1	0	1
236	2005-05-23	16.3451	0.214	0.07428	48.37	37.6051	49.16	31.62	2.8739	1	1	1	0
237	2005-05-31	18.2573	0.2116	0.07202	50.73	38.6011	51.97	35.6	2.942	0	0	1	1
238	2005-06-01	18.7217	0.2206	0.07451	53.27	39.2536	54.6	35.25	2.959	1	1	1	0
239	2005-06-02	19.026	0.2225	0.07551	52.4	39.3704	53.63	36.25	2.9466	1	1	1	1
240	2005-06-06	18.5775	0.217	0.07359	53.67	39.5627	54.49	35.62	2.9465	0	0	1	0
241	2005-06-13	19.8268	0.2412	0.08049	54.78	40.1465	55.62	37.25	2.9896	1	1	1	1
242	2005-06-15	20.4359	0.2412	0.08069	54.5	40.696	55.57	38.75	2.9829	1	1	1	1
243	2005-06-17	21.4603	0.2454	0.08309	57.76	41.8224	58.47	40.8	2.9514	1	1	1	1
244	2005-06-20	21.4929	0.2443	0.08202	58.32	41.795	59.37	40.75	2.9774	0	0	0	0
245	2005-06-21	21.5243	0.2436	0.08173	57.5	40.8746	58.9	40.5	2.9776	0	0	0	0
246	2005-06-24	21.8446	0.2437	0.08148	58.36	39.9405	59.84	41.38	2.9903	1	0	0	1
247	2005-07-05	23.6351	0.2509	0.08299	58.29	41.3073	59.59	43.88	3.0227	1	1	1	1
248	2005-07-06	23.7017	0.2551	0.08459	59.85	40.5998	61.28	44	3.0168	1	1	0	1
249	2005-07-08	24.4455	0.2599	0.08648	58.2	40.799	59.63	45.45	3.0023	1	1	1	1
250	2005-07-12	23.5102	0.2811	0.09611	58.82	41.1356	60.62	46.25	2.9188	1	1	1	1
251	2005-07-13	23.7793	0.2835	0.0961	58.27	41.0463	60.01	46	2.9474	1	0	0	0
252	2005-07-14	23.9586	0.2823	0.09573	57.31	40.2427	57.8	45.5	2.9514	0	0	0	0
253	2005-07-15	23.081	0.2793	0.0944	57.61	39.9473	58.09	44.15	2.957	0	0	0	0
254	2005-07-18	23.0938	0.2763	0.09364	56.99	39.9405	57.32	43	2.9522	0	0	0	0
255	2005-07-19	23.254	0.2841	0.09593	57.36	40.3732	57.46	43.15	2.9604	1	1	1	1
256	2005-07-20	23.0682	0.2926	0.09912	56.65	40.5243	56.72	42.9	2.9343	1	1	1	0
257	2005-07-21	22.7992	0.2902	0.0991	55.72	39.7619	57.13	43.75	2.9167	0	0	0	1
258	2005-07-22	22.8696	0.2859	0.09713	57.58	40.8677	58.65	43.2	2.9414	0	0	1	0
259	2005-07-25	23.3821	0.2841	0.09645	57.86	41.1699	59	44.25	2.9474	0	0	1	1
260	2005-07-26	23.5102	0.2787	0.09468	58.03	40.9364	59.2	44.11	2.9431	0	0	0	0
261	2005-07-28	24.7914	0.2811	0.09694	58.76	41.2111	59.94	47	2.8975	1	1	1	1
262	2005-07-29	24.5993	0.2841	0.098	59.37	40.3526	60.57	46.5	2.9002	1	1	0	0
263	2005-08-01	25.1438	0.2853	0.0996	60.44	40.6823	61.57	47.4	2.8641	1	1	1	1
264	2005-08-02	25.0477	0.2877	0.10105	60.62	41.0806	61.89	47.5	2.8485	1	1	1	1
265	2005-08-03	25.2911	0.2962	0.10577	59.65	40.5243	60.86	48.7	2.7977	1	1	0	1
266	2005-08-04	24.9388	0.2986	0.10757	60.12	40.1946	61.38	48.4	2.7793	1	1	0	0
267	2005-08-05	24.6633	0.298	0.1068	61.07	39.8992	62.31	47.8	2.7886	0	0	0	0
268	2005-08-09	25.6882	0.2896	0.10442	61.98	40.8402	63.07	49.6	2.7733	0	0	1	1
269	2005-08-10	26.3289	0.2896	0.1043	63.99	41.3441	64.9	50.75	2.7766	1	0	1	1
270	2005-08-11	26.1687	0.2859	0.10275	65.38	42.0688	65.8	51.1	2.782	0	0	1	1
271	2005-08-15	26.1046	0.2871	0.09995	65.58	41.703	66.27	50.25	2.8796	1	0	0	0
272	2005-08-16	25.7844	0.2811	0.09742	65.41	40.7712	66.08	49.4	2.885	0	0	0	0
273	2005-08-17	25.3423	0.2781	0.09549	62.56	40.1569	63.25	48.2	2.9097	0	0	0	0
274	2005-08-18	24.2789	0.272	0.09297	62.4	40.1086	63.27	46.5	2.9286	0	0	0	0
275	2005-08-22	25.6626	0.2684	0.09326	64.5	40.7712	65.45	48.85	2.8791	0	1	1	1
276	2005-08-23	25.9124	0.272	0.09493	64.65	40.7229	65.71	49.65	2.8687	1	1	0	1
277	2005-08-25	27.4883	0.2702	0.09456	66.27	40.8471	67.49	53.5	2.8552	0	0	1	1
278	2005-08-26	27.2385	0.2678	0.09323	64.87	40.3157	66.13	53	2.8805	0	0	0	0
279	2005-08-30	27.9944	0.2738	0.09512	67.57	40.4537	69.81	52.25	2.8786	1	1	1	0
280	2005-08-31	28.2827	0.2781	0.09779	67.02	41.3441	68.94	53.5	2.8432	1	1	1	1
281	2005-09-01	28.507	0.2817	0.09998	67.72	42.5727	69.47	56	2.8145	1	1	1	1
282	2005-09-02	28.1866	0.2847	0.10175	66.06	41.8825	67.57	55.45	2.7995	1	1	0	0
283	2005-09-06	27.3859	0.2847	0.10154	64.67	42.1447	65.96	54.65	2.8036	1	0	1	0
284	2005-09-07	27.9944	0.2847	0.10125	62.89	42.4208	64.37	53.85	2.8133	1	0	1	0
285	2005-09-09	29.0194	0.2835	0.10137	62.84	43.6218	64.08	56.65	2.7994	0	1	1	1
286	2005-09-13	29.8458	0.2865	0.10064	61.61	42.7038	63.11	56.85	2.8462	1	0	0	1
287	2005-09-14	30.4928	0.2847	0.10007	63.37	43.118	65.09	59	2.846	0	0	1	1
288	2005-09-15	30.1084	0.2841	0.09978	63.16	43.111	64.75	57.25	2.8472	0	0	0	0
289	2005-09-16	30.5569	0.2847	0.09994	61.81	43.9669	63	58	2.8464	1	1	1	1
290	2005-09-19	30.685	0.2859	0.09982	65.61	44.6088	67.39	59	2.8657	1	0	1	1
291	2005-09-20	31.095	0.289	0.10096	64.2	44.5398	66.23	59	2.8644	1	1	0	1
292	2005-09-22	31.7099	0.2847	0.09669	64.6	44.8504	66.5	60.95	2.9455	0	0	1	1
293	2005-09-23	31.5819	0.2877	0.09731	62.44	44.0566	64.19	60	2.9595	1	1	0	0
294	2005-09-29	31.2295	0.2726	0.09224	63.84	44.7262	66.79	58.75	2.9503	0	0	1	0
295	2005-10-03	32.5876	0.2726	0.0914	62.8	43.1318	65.47	60	2.9816	1	0	0	1
296	2005-10-04	31.8061	0.2763	0.09284	61.22	41.7927	63.9	58.75	2.9752	1	1	0	0
297	2005-10-05	30.3326	0.2775	0.09328	60.12	40.6884	62.79	56.6	2.9787	1	1	0	0
298	2005-10-06	29.1795	0.2793	0.09488	58.37	40.4261	61.36	54	2.9378	1	1	0	0
299	2005-10-07	28.635	0.2757	0.09251	59.21	41.137	61.84	53.75	2.9737	0	0	1	0
300	2005-10-10	29.4358	0.2757	0.09247	58.78	40.3778	61.8	55.85	2.9834	1	0	0	1
301	2005-10-13	27.8663	0.2714	0.09022	60.14	40.1431	63.08	52.6	3.0044	0	0	0	0
302	2005-10-14	27.2257	0.2648	0.08872	59.35	40.4744	62.63	51.5	2.9817	0	0	1	0
303	2005-10-17	27.6101	0.2624	0.0877	60.57	40.6263	64.36	52.8	2.9983	0	0	1	1
304	2005-10-18	26.9054	0.266	0.08838	59.28	38.8593	63.2	51	3.0073	1	1	0	0
305	2005-10-20	26.9887	0.2624	0.0871	57.91	38.1001	61.03	51	3.0093	0	0	0	1
306	2005-10-24	26.9695	0.2611	0.08704	58.24	39.2389	60.32	50.95	3.0047	0	0	1	0
307	2005-10-25	27.3539	0.2654	0.08896	60.24	39.4805	62.44	51.5	2.9802	1	1	1	1
308	2005-10-27	27.751	0.2611	0.08763	59.14	38.3761	61.09	52	2.9774	0	0	0	1
309	2005-11-01	28.8272	0.2442	0.08005	58.37	38.9283	59.85	53.75	3.0533	0	0	1	1
310	2005-11-03	29.4679	0.2497	0.08169	60.52	40.4261	61.78	55.2	3.0577	1	1	1	1
311	2005-11-04	29.7241	0.2527	0.08143	59.25	39.9636	60.58	55.2	3.1002	1	0	0	1
312	2005-11-10	27.514	0.2539	0.08212	55.68	39.1617	57.8	50.2	3.09	1	1	0	0
313	2005-11-11	26.7709	0.2539	0.08192	54.99	39.2103	57.53	48.5	3.0964	1	0	1	0
314	2005-11-14	27.9881	0.2569	0.08219	54.73	39.3005	57.69	51.5	3.13	1	1	1	1
315	2005-11-15	27.9304	0.2557	0.0822	54.05	39.1478	56.98	50.75	3.1116	0	1	0	0
316	2005-11-16	27.7382	0.2575	0.08264	56	39.6681	57.88	50.75	3.1156	1	1	1	1
317	2005-11-17	28.0585	0.2563	0.0826	54.85	39.8069	56.34	51	3.1021	0	0	1	1
318	2005-11-18	28.1546	0.2569	0.08284	54.88	40.4105	56.14	51.5	3.1013	1	1	1	1
319	2005-11-21	28.6991	0.2569	0.08236	55.34	41.1874	57.7	52.05	3.1196	1	0	1	1
320	2005-11-30	30.0252	0.2926	0.09422	55.05	40.2578	57.32	54.85	3.1041	1	1	0	1
321	2005-12-06	32.3506	0.2883	0.09304	57.61	41.4095	59.94	60	3.0997	0	0	1	1
322	2005-12-07	33.8816	0.292	0.09379	56.98	40.9446	59.21	60.03	3.1129	1	1	0	1
323	2005-12-08	33.8816	0.305	0.09911	58.67	41.2221	60.66	61.7	3.0795	1	1	1	1
324	2005-12-09	33.4396	0.2996	0.09742	57.31	40.5839	59.39	61.1	3.0788	0	0	0	0
325	2005-12-13	31.9021	0.2947	0.09643	59.52	40.9724	61.37	59.5	3.0556	0	0	1	0
326	2005-12-14	31.9662	0.2898	0.09544	59.6	41.5274	60.85	59.5	3.036	0	0	1	1
327	2005-12-15	31.9662	0.2886	0.09452	59.85	41.2707	59.99	59.9	3.0493	0	0	0	1
328	2005-12-20	30.9156	0.2959	0.096	56.17	40.1885	57.98	57.8	3.0807	1	1	0	0
329	2005-12-21	31.1783	0.2965	0.09574	56.72	39.9595	58.56	58.35	3.0948	1	0	0	1
330	2005-12-22	31.5178	0.2941	0.09519	56.55	39.6127	58.28	58.2	3.0885	0	0	0	0
331	2005-12-23	31.0693	0.291	0.09423	56.69	39.6127	58.43	58.15	3.0885	0	0	1	0
332	2006-01-03	32.5428	0.2971	0.09689	61.35	40.5631	63.14	60.25	3.0672	1	1	1	1
333	2006-01-04	32.9912	0.3142	0.1035	61.68	40.6325	63.42	62	3.0294	1	1	1	1
334	2006-01-05	32.9271	0.3142	0.10317	61.13	40.4313	62.79	62	3.0431	1	0	0	1
335	2006-01-09	33.8239	0.3264	0.10759	62.01	41.2083	63.5	64	3.037	1	1	1	1
336	2006-01-10	32.831	0.3295	0.10894	61.92	41.5274	63.37	62.35	3.024	1	1	1	0
337	2006-01-11	33.3755	0.3478	0.11622	62.17	41.8118	63.94	63.5	2.9936	1	1	1	1
338	2006-01-12	34.4325	0.36	0.11896	62.62	41.3748	63.94	64.25	3.0257	1	1	0	1
339	2006-01-17	34.8233	0.363	0.11998	64.9	42.6929	66.31	66.5	3.0212	1	1	1	1
340	2006-01-19	35.1692	0.3661	0.12175	65.23	42.6651	66.83	66.75	3.0091	1	1	0	1
341	2006-01-20	35.2333	0.3783	0.12555	66.43	41.9922	68.35	67.25	3.0118	1	1	0	1
342	2006-01-23	36.5145	0.3813	0.12895	66.16	42.457	68.1	68.25	2.9589	1	1	1	1
343	2006-01-24	36.5145	0.3661	0.12407	65.34	42.2905	67.06	69.85	2.9482	0	0	0	1
344	2006-01-25	36.5209	0.3752	0.12673	64.23	41.7702	65.85	69.95	2.9609	1	1	0	1
345	2006-01-27	37.2256	0.3691	0.12353	66.24	42.5194	67.76	70.5	2.9858	0	0	1	1
346	2006-01-30	38.3466	0.3691	0.12341	66.59	43.7821	68.35	72.35	2.9886	1	0	1	1
347	2006-01-31	37.2512	0.3752	0.12613	65.99	43.5323	67.92	71.5	2.9707	1	1	0	0
348	2006-02-01	38.3082	0.3935	0.13155	65.03	42.9773	66.56	72.5	2.9924	1	1	0	1
349	2006-02-02	35.97	0.3874	0.12989	62.88	42.9773	64.68	70.35	2.9785	0	0	1	0
350	2006-02-03	35.2333	0.3844	0.12796	63.39	42.5888	65.37	66.6	3.0022	0	0	0	0
351	2006-02-06	37.4754	0.3844	0.12788	63.33	42.9912	65.11	70.25	3.0046	1	0	1	1
352	2006-02-08	35.6048	0.3813	0.12716	61.06	42.1176	62.55	66.75	2.9982	0	0	0	0
353	2006-02-09	36.0341	0.3813	0.12888	60.75	41.7899	62.62	67	2.9612	1	1	0	1
354	2006-02-10	35.4895	0.3844	0.12953	59.64	41.4481	61.84	66	2.9705	1	1	0	0
355	2006-02-13	34.2083	0.3783	0.12763	59.38	41.5667	61.24	64	2.9627	0	0	1	0
356	2006-02-14	32.3506	0.363	0.12224	59.52	41.5318	59.57	61	2.9703	0	0	0	0
357	2006-02-15	32.9591	0.36	0.12124	58.15	41.6783	57.65	61.5	2.9669	0	0	1	1
358	2006-02-16	34.266	0.3661	0.12352	58.79	42.02	58.46	63.75	2.963	1	1	1	1
359	2006-02-17	35.2333	0.3691	0.12531	59.89	42.2292	59.88	66	2.9468	1	1	1	1
360	2006-02-21	36.2582	0.3691	0.12577	61.6	42.3757	61.1	67.6	2.9335	1	1	1	1
361	2006-02-23	34.913	0.3691	0.12544	60.54	41.7271	60.54	64.6	2.942	1	0	0	0
362	2006-02-24	35.6177	0.3661	0.12401	62.6	42.1386	62.91	66	2.952	0	0	1	1
363	2006-02-27	35.4191	0.3691	0.12496	60.99	41.7899	61	65.8	2.9516	1	1	0	0
364	2006-02-28	33.3435	0.3813	0.13073	61.76	41.4063	61.41	63.5	2.9119	1	1	0	0
365	2006-03-01	34.0225	0.3813	0.13075	62.45	42.0828	61.97	63.6	2.9184	1	1	1	1
366	2006-03-02	33.478	0.3661	0.12648	64.07	42.4385	63.36	63.75	2.893	0	0	1	1
367	2006-03-03	33.9521	0.3752	0.12961	64.18	42.5291	63.67	63.4	2.8941	1	1	1	0
368	2006-03-06	35.1628	0.3813	0.13145	62.34	41.8317	62.41	65.6	2.9002	1	1	0	1
369	2006-03-07	33.6959	0.3752	0.1279	61.17	41.741	61.58	63.2	2.9331	0	0	0	0
370	2006-03-09	32.8822	0.3661	0.12469	61.06	41.0924	60.47	60.95	2.9367	0	0	0	0
371	2006-03-10	32.5748	0.36	0.12208	60.83	41.2738	59.96	60.2	2.9484	0	0	1	0
372	2006-03-13	33.8239	0.363	0.1233	62.2	41.5946	61.77	61.75	2.9414	1	1	1	1
373	2006-03-14	32.9847	0.3447	0.117	63.97	42.4106	63.1	62.5	2.9451	0	0	1	1
374	2006-03-15	33.9521	0.3478	0.11905	62.94	42.557	62.17	63.3	2.9192	1	1	1	1
375	2006-03-16	33.8239	0.3569	0.12363	62.91	42.9894	63.58	64.7	2.8868	1	1	1	1
376	2006-03-17	34.5926	0.3569	0.12396	63.26	42.578	62.77	64.75	2.8793	1	1	0	1
377	2006-03-21	33.0488	0.3661	0.12594	62.13	42.3478	60.57	62.25	2.9054	1	1	0	0
378	2006-03-22	33.4332	0.3569	0.12224	61.5	42.578	61.77	62.4	2.9198	0	0	1	1
379	2006-03-23	34.5286	0.36	0.12293	63.27	42.7174	63.91	65	2.9277	1	1	1	1
380	2006-03-24	34.6503	0.36	0.12344	63.51	42.6617	64.26	65.2	2.9179	1	1	0	1
381	2006-03-27	33.8944	0.3661	0.12543	63.61	42.7454	64.16	63.75	2.9183	1	1	1	0
382	2006-03-28	33.9521	0.3569	0.12235	64.97	42.5082	66.07	64	2.9178	0	0	0	1
383	2006-03-30	34.74	0.3478	0.11992	66.46	42.6268	67.15	66.5	2.8998	0	0	1	1
384	2006-04-03	35.0155	0.3508	0.12107	66.84	42.564	66.74	65.6	2.8952	1	1	0	0
385	2006-04-05	35.0732	0.3295	0.11501	67.1	43.3521	67.07	68	2.8639	0	0	1	1
386	2006-04-06	35.3934	0.3142	0.10929	67.84	43.3033	67.94	68.1	2.8784	0	0	0	1
387	2006-04-11	36.5145	0.3325	0.11549	69.37	43.2405	68.98	69.75	2.8779	1	1	0	1
388	2006-04-13	36.4889	0.3264	0.11313	70.57	42.9337	69.32	69	2.8833	0	0	0	0
389	2006-04-17	36.4889	0.3295	0.11572	71.46	43.2754	70.4	70	2.8436	1	1	1	1
390	2006-04-18	37.642	0.3264	0.11511	72.51	44.3146	71.35	71.5	2.8292	0	0	1	1
391	2006-04-19	37.9879	0.3264	0.11605	73.73	44.8446	72.17	73.2	2.8105	1	1	1	1
392	2006-04-20	37.7445	0.3264	0.11549	73.18	44.5796	71.95	72.5	2.8266	1	0	0	0
393	2006-04-21	36.5786	0.3295	0.11733	74.57	45.3328	75.17	70.5	2.8079	1	1	1	0
394	2006-04-28	35.3038	0.3447	0.12516	72.02	43.9937	71.88	70	2.7509	1	1	0	0
395	2006-05-02	35.8419	0.3447	0.12496	74.64	45.1026	74.61	71	2.757	1	0	1	1
396	2006-05-03	35.97	0.3386	0.12347	72.65	44.475	72.28	70.75	2.7435	0	0	0	0
397	2006-05-04	35.496	0.3295	0.12051	70.29	44.1541	69.94	70.2	2.7355	0	0	0	0
398	2006-05-05	36.1622	0.3386	0.12444	70.95	44.6354	70.19	70.5	2.7221	1	1	1	1
399	2006-05-08	34.3364	0.3447	0.12651	70.21	44.4331	69.77	68	2.7272	1	1	0	0
400	2006-05-09	32.0302	0.3435	0.12639	71.08	44.5935	70.69	64.25	2.7179	0	0	1	0
401	2006-05-10	32.9784	0.3372	0.12439	72.44	44.7758	72.13	66	2.7091	0	0	1	1
402	2006-05-12	32.1327	0.3372	0.1247	72.32	43.6262	72.04	64.75	2.7031	1	1	0	0
403	2006-05-15	30.6722	0.3247	0.11681	69.67	43.458	69.41	62	2.7686	0	0	0	0
404	2006-05-16	28.9105	0.3278	0.11969	70.34	43.43	69.53	58.1	2.7354	1	1	0	0
405	2006-05-17	27.2321	0.331	0.12011	69.04	42.1823	68.69	53.75	2.7557	1	1	0	0
406	2006-05-18	27.136	0.3154	0.11438	69.67	41.979	69.45	54.3	2.7595	0	0	0	1
407	2006-05-19	27.2321	0.3185	0.11523	68.68	42.3716	68.53	54.3	2.7611	1	1	1	1
408	2006-05-22	25.6242	0.3116	0.11251	69.35	42.6029	69.23	52.25	2.7658	0	0	1	0
409	2006-05-23	27.5396	0.2754	0.09984	71	42.3295	71.76	55.25	2.757	0	0	0	1
410	2006-05-24	28.9233	0.2941	0.10552	69.22	42.1262	69.86	58	2.7855	1	1	0	1
411	2006-05-25	28.9233	0.3041	0.10961	70.71	43.1216	71.32	57.75	2.771	1	1	1	0
412	2006-05-30	29.8857	0.3185	0.11631	71.05	42.1963	72.03	58.5	2.7418	1	1	0	1
413	2006-06-02	30.7611	0.3216	0.11836	71.03	43.2127	72.33	60.25	2.7178	1	1	1	1
414	2006-06-05	30.7611	0.3216	0.11828	71.37	42.0912	72.6	61.5	2.7186	1	0	0	1
415	2006-06-06	29.5264	0.3216	0.11717	70.81	42.3365	72.5	57	2.7452	1	0	1	0
416	2006-06-07	28.9059	0.3216	0.1171	69.19	41.229	70.82	56.25	2.7452	1	0	0	0
417	2006-06-08	26.7763	0.3154	0.11343	69.05	41.7547	70.35	52.5	2.7841	0	0	1	0
418	2006-06-09	25.9663	0.3154	0.11343	70.48	41.215	71.63	50.5	2.7817	1	1	0	0
419	2006-06-12	26.4627	0.3154	0.11263	68.93	40.8225	70.36	50.75	2.8005	1	0	0	1
420	2006-06-13	25.1497	0.3122	0.11095	66.92	39.708	68.56	48	2.8196	0	0	0	0
421	2006-06-14	24.6533	0.3091	0.11072	66.98	40.5141	69.14	48.25	2.7938	0	0	1	1
422	2006-06-15	24.6533	0.3029	0.10833	67.43	41.4393	69.5	48.5	2.7908	0	0	1	1
423	2006-06-19	26.9722	0.3085	0.11001	68.11	40.2267	68.98	51.25	2.8035	1	1	0	1
424	2006-06-21	26.5216	0.3047	0.10747	69.17	40.6963	70.33	51.25	2.837	0	0	1	1
425	2006-06-23	27.828	0.2985	0.10265	69.93	40.7244	70.87	52.5	2.9116	0	0	1	1
426	2006-06-26	27.9587	0.2935	0.10191	70.73	41.229	71.8	55	2.8737	0	0	1	1
427	2006-06-30	30.4083	0.3185	0.1137	73.51	43.0024	73.93	60	2.7988	1	1	1	1
428	2006-07-06	31.9107	0.3216	0.11423	74.08	44.4884	75.14	62	2.8115	1	1	1	1
429	2006-07-07	31.7475	0.3278	0.11734	73.51	44.0468	74.09	61.9	2.7932	1	1	0	0
430	2006-07-10	31.1138	0.3247	0.11531	72.89	44.187	73.61	61	2.8188	0	0	1	0
431	2006-07-11	30.6043	0.3247	0.1161	73.67	44.8459	74.16	60.5	2.7942	1	1	1	0
432	2006-07-12	31.4862	0.3216	0.11428	74.39	44.8389	74.95	62.5	2.8129	0	0	0	1
433	2006-07-13	31.0289	0.3216	0.11372	76.69	44.9089	76.7	59.5	2.8297	1	0	1	0
434	2006-07-18	30.0491	0.3341	0.11645	74.36	45.2875	73.54	58	2.87	1	1	1	0
435	2006-07-19	30.3103	0.3247	0.1139	73.9	45.3225	72.66	59.25	2.8494	0	0	1	1
436	2006-07-20	30.441	0.3278	0.11609	73.72	45.0351	73.08	59.1	2.8216	1	1	0	0
437	2006-07-21	29.3958	0.3247	0.11511	73.75	44.8108	74.43	57.5	2.8182	0	0	0	0
438	2006-07-24	30.0491	0.3216	0.11404	74.61	45.8132	75.05	58	2.8224	0	0	1	1
439	2006-07-25	30.7022	0.3278	0.11625	73.28	46.0795	73.75	60.25	2.8225	1	1	1	1
440	2006-07-26	31.8128	0.3278	0.11715	74	46.6823	73.94	61.2	2.7965	1	1	1	1
441	2006-07-27	31.8454	0.3466	0.12431	75.01	46.5912	74.54	63	2.7934	1	1	0	1
442	2006-07-28	31.865	0.3497	0.12566	73.39	46.9627	73.24	62.5	2.782	1	1	1	0
443	2006-07-31	31.3686	0.3435	0.12373	75.15	47.4814	74.4	61.85	2.7757	0	0	1	0
444	2006-08-01	31.2641	0.3372	0.1218	75.89	47.7898	74.91	62	2.771	0	0	1	1
445	2006-08-04	30.9178	0.3247	0.11896	76.17	48.1473	74.76	60	2.733	0	0	1	0
446	2006-08-07	30.5259	0.3216	0.11762	78.3	48.5258	76.98	60.75	2.739	0	0	1	1
447	2006-08-08	30.1144	0.3341	0.12181	77.55	48.5538	76.31	59.25	2.7454	1	1	1	0
448	2006-08-14	29.6571	0.3435	0.12383	74.3	48.765	73.53	58	2.7774	1	1	1	0
449	2006-08-16	30.0556	0.3528	0.1288	73.08	47.582	71.89	58.25	2.7414	1	1	0	1
450	2006-08-17	29.4285	0.3403	0.12418	71.58	47.9411	70.06	58.45	2.7477	0	0	1	1
451	2006-08-18	29.533	0.3403	0.12362	72.3	48.6594	71.14	58.25	2.7492	1	0	1	0
452	2006-08-21	28.4094	0.3435	0.12568	73.38	49.1734	72.45	57.05	2.7349	1	1	1	0
453	2006-08-22	27.9587	0.3435	0.12466	73.24	49.441	72.63	54.35	2.76	1	0	1	0
454	2006-08-23	27.4034	0.3372	0.12214	72.02	49.0326	71.76	53.25	2.7616	0	0	0	0
455	2006-08-24	27.4492	0.3372	0.12189	72.68	49.8002	72.36	54	2.7677	1	0	1	1
456	2006-08-28	27.9913	0.3372	0.1227	70.82	49.3636	70.61	54.5	2.7497	1	1	0	1
457	2006-08-29	26.9462	0.3341	0.12087	69.86	48.8777	69.71	54.34	2.76	0	0	0	0
458	2006-08-31	27.1878	0.3466	0.12568	70.25	47.6524	70.26	53.6	2.759	1	1	0	0
459	2006-09-01	27.3119	0.3435	0.125	69.15	47.9552	69.19	53.75	2.7485	0	0	1	1
460	2006-09-05	27.3381	0.3435	0.12481	68.09	48.2228	68.6	53.25	2.7515	1	0	1	0
461	2006-09-06	26.5216	0.3403	0.1235	66.93	47.3073	67.5	51.6	2.7519	0	0	0	0
462	2006-09-07	26.1819	0.3403	0.12297	66.53	47.6665	67.32	51	2.7663	1	0	1	0
463	2006-09-08	26.5476	0.3466	0.12476	65.33	47.0468	66.25	51.25	2.7786	1	1	0	1
464	2006-09-11	25.6919	0.3435	0.12412	64.55	45.73	65.61	50.1	2.7687	0	0	0	0
465	2006-09-12	25.2281	0.3435	0.12391	62.99	45.561	63.76	48.8	2.7728	1	0	0	0
466	2006-09-13	25.4763	0.3403	0.12339	62.99	46.0257	63.97	49.85	2.7578	0	0	1	1
467	2006-09-14	25.3131	0.3372	0.12261	62.24	45.568	63.22	49.65	2.7496	0	0	0	0
468	2006-09-18	24.7317	0.3341	0.1203	64.05	46.6877	63.8	49	2.7795	0	0	1	0
469	2006-09-21	24.3006	0.3435	0.12438	61.34	45.6173	61.59	47.05	2.7615	1	1	0	0
470	2006-09-25	24.3332	0.3372	0.12119	60.8	45.8145	61.45	46.75	2.778	0	0	1	0
471	2006-09-26	24.7512	0.3372	0.12089	60.12	46.7792	61.01	47.75	2.7903	1	0	1	1
472	2006-09-27	25.2804	0.3435	0.12332	62.21	47.2721	62.96	49.4	2.786	1	1	1	1
473	2006-09-28	26.3909	0.3497	0.12545	62.54	47.5045	62.76	51.35	2.7885	1	1	1	1
474	2006-09-29	26.6914	0.3497	0.12543	62.48	47.251	62.91	51.5	2.7862	1	0	0	1
475	2006-10-02	25.5286	0.3591	0.12945	60.45	47.1806	61.03	49.25	2.775	1	1	0	0
476	2006-10-05	25.6397	0.3747	0.13463	60	47.4059	60.03	50.1	2.7839	1	1	1	1
477	2006-10-09	25.7377	0.3716	0.13341	60.54	46.8637	59.96	49.75	2.7859	0	0	0	0
478	2006-10-10	25.3457	0.3716	0.13265	59.34	47.3214	58.52	49.15	2.8027	1	0	1	0
479	2006-10-11	25.7703	0.3653	0.1308	58.65	46.8496	57.59	49.6	2.7972	0	0	0	1
480	2006-10-16	27.6255	0.3778	0.13508	59.96	49.1734	59.94	52.75	2.8007	1	1	1	1
481	2006-10-17	27.3381	0.3903	0.13955	60.94	48.8777	58.93	53.15	2.7999	1	1	0	1
482	2006-10-18	27.4752	0.3872	0.13769	59.58	48.7086	57.65	52	2.8135	0	0	0	0
483	2006-10-23	26.9462	0.3778	0.13412	59.21	49.2368	58.81	51.5	2.8204	0	0	1	0
484	2006-10-30	27.1094	0.3747	0.13521	58.68	49.8847	58.36	53.25	2.7709	0	1	1	1
485	2006-10-31	27.8215	0.3934	0.14282	59.03	50.2931	58.73	54.25	2.7584	1	1	1	1
486	2006-11-01	27.8215	0.384	0.13952	58.98	50.0396	58.71	54.85	2.7527	0	0	0	1
487	2006-11-06	28.6119	0.3872	0.14011	59.75	51.3423	60.02	55.45	2.7611	1	1	1	1
488	2006-11-08	28.5466	0.3684	0.13397	59.59	52.2014	59.83	55.5	2.7504	0	0	1	1
489	2006-11-09	28.7099	0.3747	0.13713	61.32	52.7672	61.16	56.25	2.7318	1	1	1	1
490	2006-11-10	29.3958	0.384	0.14068	59.71	52.6329	59.59	57	2.7321	1	1	0	1
491	2006-11-13	29.3697	0.3809	0.13899	59.05	52.6399	58.58	57.25	2.7397	0	0	1	1
492	2006-11-20	27.4361	0.3716	0.1363	58.98	51.2255	58.8	54.15	2.7264	0	0	0	0
493	2006-11-21	27.6386	0.3591	0.13196	60.39	51.9044	60.17	53	2.7203	0	0	1	0
494	2006-11-29	26.822	0.3559	0.13539	63.07	53.7715	62.46	53.8	2.6305	0	1	1	1
495	2006-11-30	26.4562	0.3684	0.14249	64.26	54.3232	63.13	54.5	2.5874	1	1	1	1
496	2006-12-04	26.7828	0.3622	0.14043	63.45	55.0021	62.44	54.25	2.5772	0	0	1	0
497	2006-12-05	26.7828	0.3591	0.13919	63.32	55.2072	62.43	54.85	2.5724	0	0	1	1
498	2006-12-06	26.6261	0.3622	0.14021	63.07	53.9695	62.19	54	2.5829	1	1	0	0
499	2006-12-07	27.4361	0.3684	0.14289	62.57	53.5452	62.49	56.05	2.5786	1	1	0	1
500	2006-12-08	27.4361	0.3653	0.14085	62.2	53.3967	62.03	55.75	2.5928	0	0	0	0
501	2006-12-12	27.3054	0.3622	0.13985	61.52	53.9271	61.02	55.4	2.589	0	0	1	0
502	2006-12-13	27.6321	0.3559	0.13731	61.33	54.7121	61.37	55	2.5953	0	0	1	0
503	2006-12-18	28.6446	0.3403	0.12994	62.13	53.4037	62.21	56.8	2.6152	0	0	0	1
504	2006-12-19	28.3048	0.3528	0.13619	62.81	54.4505	63.15	55.5	2.588	1	1	1	0
505	2007-01-05	26.6522	0.3778	0.14539	55.64	51.7983	56.31	53.25	2.5982	1	1	0	0
506	2007-01-09	26.1296	0.3778	0.14508	55.18	50.985	55.64	51.55	2.6018	1	0	0	0
507	2007-01-11	25.6397	0.3809	0.14461	51.7	50.2	51.88	50.2	2.6392	1	0	0	0
508	2007-01-12	25.607	0.3809	0.14467	52.95	51.3881	52.99	51.5	2.6361	1	1	1	1
509	2007-01-17	25.7442	0.3747	0.14286	52.78	51.2467	52.24	50.6	2.629	0	0	0	0
510	2007-01-18	26.0185	0.3716	0.14205	51.75	50.8931	50.48	51.25	2.6166	0	0	0	1
511	2007-01-19	26.3582	0.3747	0.14355	53.44	52.0034	51.99	51.85	2.6056	1	1	1	1
512	2007-01-22	26.8547	0.384	0.14741	52.7	51.5579	51.13	52.8	2.6091	1	1	0	1
513	2007-01-23	26.7175	0.384	0.14724	55.1	52.6824	55.04	54	2.6097	1	0	1	1
514	2007-01-24	26.5738	0.3747	0.14305	55.43	52.9723	55.37	53.5	2.6202	0	0	1	0
515	2007-01-25	26.6587	0.3747	0.14291	54.12	51.9963	54.23	52.9	2.6181	1	0	0	0
516	2007-01-29	26.7502	0.384	0.14595	53.68	51.77	54.01	53.3	2.6318	1	1	0	1
517	2007-01-31	26.8286	0.3778	0.14432	57.4	52.4065	58.14	53.5	2.6177	0	0	1	1
518	2007-02-02	27.3904	0.3747	0.14333	58.41	53.425	59.02	54.55	2.6136	0	0	1	1
519	2007-02-05	27.619	0.3778	0.14457	58.1	53.5169	58.74	54.15	2.6137	1	1	1	0
520	2007-02-06	27.2989	0.3747	0.14428	58.42	53.3684	58.88	54.2	2.6007	0	0	0	1
521	2007-02-07	27.3511	0.3778	0.14604	57.23	53.1198	57.71	54.7	2.5881	1	1	0	1
522	2007-02-08	27.4361	0.3809	0.14698	59.03	53.5957	59.71	54.6	2.5891	1	1	1	0
523	2007-02-09	27.926	0.3778	0.14535	59.01	53.4252	59.89	55.25	2.5995	0	0	0	1
524	2007-02-12	27.8411	0.3809	0.14544	56.6	52.9848	57.81	55	2.613	1	1	0	0
525	2007-02-14	27.9848	0.3716	0.14404	57.43	53.6951	58	55.7	2.5797	0	0	1	1
526	2007-02-16	27.5014	0.3716	0.14447	58.95	53.4749	59.39	55.45	2.5725	1	1	0	0
527	2007-02-20	27.5014	0.3716	0.14446	57.98	53.1766	58.07	55.5	2.5729	1	0	0	1
528	2007-02-21	27.3511	0.3778	0.1467	59.35	53.1127	60.07	54.8	2.5751	1	1	0	0
529	2007-02-22	27.9913	0.3716	0.1443	60.62	53.3258	60.95	55.65	2.5745	0	0	1	1
530	2007-02-27	27.4361	0.3809	0.14892	61.36	51.0175	61.46	55	2.5579	1	1	0	0
531	2007-03-01	27.1487	0.3684	0.14278	62.11	50.4208	62	54.9	2.5816	0	0	0	0
532	2007-03-05	27.4557	0.3372	0.13007	60.54	49.7035	60.07	54.15	2.5924	0	0	0	0
533	2007-03-06	27.3707	0.3528	0.13657	61.39	50.4279	60.69	55.6	2.5819	1	1	1	1
534	2007-03-09	28.3506	0.3591	0.13968	61.13	50.5132	60.05	56.55	2.5736	1	1	1	1
535	2007-03-13	27.7039	0.3622	0.14181	60.9	49.6538	57.93	55.9	2.5559	1	1	0	0
536	2007-03-16	27.0833	0.3653	0.14482	60.3	49.6183	57.11	55.8	2.5277	1	1	0	0
537	2007-03-19	27.828	0.3684	0.14694	60.52	50.499	56.59	56.55	2.5088	1	1	1	1
538	2007-03-21	27.5929	0.3622	0.14362	60.77	52.0118	59.61	56.9	2.5204	0	0	1	1
539	2007-03-23	30.0163	0.3622	0.14325	63.18	53.2832	62.28	61	2.5329	1	0	1	1
540	2007-03-26	31.3621	0.3622	0.14362	64.41	53.6028	62.91	64.05	2.521	1	1	1	1
541	2007-04-02	31.0942	0.3559	0.14219	68.74	54.0928	65.94	63.25	2.5054	0	0	1	0
542	2007-04-05	29.7877	0.3497	0.14081	68.24	54.8457	64.28	61.85	2.4837	0	0	1	0
543	2007-04-12	30.3168	0.3435	0.13844	68.72	54.9665	63.85	63.35	2.4782	0	0	1	1
544	2007-04-13	31.0811	0.3435	0.13897	68.97	54.9807	63.63	64.45	2.468	1	1	1	1
545	2007-04-16	31.2902	0.3466	0.14096	67.25	55.5205	63.61	64.55	2.4599	1	1	1	1
546	2007-04-19	30.8329	0.331	0.135	65.94	55.0162	61.83	63.7	2.4532	0	0	0	0
547	2007-04-20	30.6043	0.3403	0.13878	66.49	56.6498	63.38	64	2.4497	1	1	1	1
548	2007-04-23	30.5716	0.3466	0.14098	68.15	56.252	65.89	64	2.4583	1	1	0	1
549	2007-04-24	30.0425	0.3403	0.13901	67.16	55.8259	64.58	62.75	2.449	0	0	0	0
550	2007-04-25	30.3038	0.3403	0.13957	68.57	56.7634	65.84	64.1	2.4397	1	1	1	1
551	2007-04-27	31.2118	0.3466	0.14235	68.41	57.0759	66.46	64.9	2.4329	1	1	1	1
552	2007-05-02	30.5651	0.3484	0.14262	66.25	56.6924	63.68	63.2	2.4452	1	1	0	0
553	2007-05-04	31.6625	0.3549	0.14547	65.31	57.2108	61.93	66.65	2.4437	1	1	1	1
554	2007-05-07	31.2902	0.3614	0.14864	64.44	57.4097	61.47	64.95	2.432	1	1	1	0
555	2007-05-08	30.6565	0.3517	0.14405	65.54	57.8004	62.26	63.7	2.4414	0	0	1	0
556	2007-05-09	30.8003	0.3452	0.14257	65.2	57.8288	61.55	64.35	2.4237	0	0	1	1
557	2007-05-10	31.0289	0.3517	0.14474	65.79	56.6304	61.81	63.65	2.4337	1	1	0	0
558	2007-05-15	31.865	0.3452	0.1432	68.11	57.8716	63.17	66.35	2.4155	0	0	1	1
559	2007-05-16	32.3419	0.3388	0.13974	68.01	58.0998	62.55	67	2.4238	0	0	1	1
560	2007-05-23	32.9886	0.3517	0.14478	70.6	59.1983	65.77	68	2.4329	1	1	1	1
561	2007-05-29	32.9821	0.3259	0.13429	68.13	58.9344	63.15	67.95	2.4335	0	0	0	0
562	2007-05-30	32.0921	0.3226	0.13218	67.84	59.9188	63.49	64.8	2.4395	0	0	1	0
563	2007-05-31	32.9127	0.3291	0.13551	68.04	59.3267	64.01	66.15	2.4264	1	1	0	1
564	2007-06-01	32.8593	0.3291	0.13559	69.07	60.0757	65.08	66.4	2.4308	1	1	1	1
565	2007-06-04	32.9794	0.3291	0.13612	70.4	60.0757	66.21	65.7	2.4184	1	1	1	0
566	2007-06-08	32.3589	0.3213	0.13073	68.6	58.9772	64.76	63.5	2.4593	0	0	0	0
567	2007-06-18	33.2263	0.3388	0.14149	72.18	61.6022	69.09	67.35	2.3922	1	1	1	1
568	2007-06-20	33.3597	0.342	0.14356	70.42	59.0771	68.19	67.15	2.3853	1	1	0	0
569	2007-06-22	33.293	0.342	0.145	71.18	58.8631	69.14	66.15	2.3532	1	1	0	0
570	2007-06-27	31.6918	0.3355	0.14229	70.53	59.5479	68.97	63.9	2.3579	0	0	1	0
571	2007-07-02	33.3531	0.3517	0.15394	72.63	60.5037	71.09	68.1	2.2847	1	1	1	1
572	2007-07-03	32.9928	0.3549	0.15463	72.93	60.8889	71.41	67.4	2.2995	1	1	1	0
573	2007-07-06	33.3597	0.3646	0.15941	75.62	61.6736	72.81	68.35	2.2956	1	1	1	1
574	2007-07-09	33.6934	0.3678	0.16016	75.78	62.3726	72.19	69.2	2.2963	1	1	1	1
575	2007-07-10	33.2463	0.371	0.16224	76.4	61.7021	72.81	68.55	2.29	1	1	0	0
576	2007-07-11	32.3589	0.3614	0.15895	75.44	62.2656	72.56	66.75	2.2743	0	0	1	0
577	2007-07-12	32.6592	0.3646	0.16024	76.4	63.9277	72.5	66.9	2.2762	1	1	1	1
578	2007-07-13	5.69784	0.3646	0.16044	77.57	64.4341	73.93	66.45	2.2728	1	1	1	0
579	2007-07-16	32.1254	0.371	0.16333	77.33	63.9847	74.15	66.3	2.2715	1	1	0	0
580	2007-07-18	30.6976	0.3646	0.16103	76.76	65.019	75.05	64.35	2.2641	0	0	1	0
581	2007-07-19	32.0921	0.3775	0.16695	77.67	65.8322	75.92	66.2	2.262	1	1	1	1
582	2007-07-20	31.8986	0.3807	0.16782	77.64	65.5825	75.57	66.25	2.2685	1	1	0	1
583	2007-07-23	32.0521	0.3872	0.1711	76.86	66.6526	74.89	66.85	2.265	1	1	1	1
584	2007-07-24	32.6926	0.3872	0.17133	75.08	64.7979	73.56	67.45	2.2588	1	1	0	1
585	2007-07-26	31.098	0.3646	0.15912	75.18	62.9361	74.95	61.6	2.2954	0	0	0	0
586	2007-07-27	30.0705	0.3549	0.1528	76.26	61.053	77.02	61.25	2.3243	0	0	0	0
587	2007-07-30	29.53	0.342	0.14783	75.74	61.3526	76.83	61.25	2.3123	0	0	1	1
588	2007-07-31	30.8377	0.3549	0.15389	77.05	60.7248	78.21	62.45	2.3067	1	1	0	1
589	2007-08-01	30.8911	0.342	0.14728	75.35	61.2313	76.53	63.15	2.324	0	0	1	1
590	2007-08-02	30.691	0.3517	0.15198	75.76	60.7605	76.86	62.3	2.3126	1	1	0	0
591	2007-08-03	29.8637	0.3484	0.15166	74.75	58.5492	75.48	61.4	2.2955	0	0	0	0
592	2007-08-07	28.8428	0.3452	0.14924	71.8	61.1314	72.42	58.75	2.3129	0	0	1	0
593	2007-08-08	30.0171	0.3452	0.15066	70.99	62.7007	72.15	62.3	2.2941	1	1	1	1
594	2007-08-13	29.877	0.3388	0.1447	70.23	59.3849	71.62	60.5	2.3426	0	0	0	0
595	2007-08-16	28.6894	0.3194	0.13157	69.42	57.7735	71	58	2.428	0	0	0	0
596	2007-08-17	28.6894	0.3097	0.12813	70.44	60.2586	71.98	57.95	2.4177	0	0	1	0
597	2007-08-27	29.3566	0.3291	0.13845	70.95	60.9605	71.97	60.3	2.3753	1	1	1	1
598	2007-08-28	29.6234	0.3388	0.14205	70.55	59.4422	71.73	60.3	2.3865	1	1	0	1
599	2007-08-29	29.2899	0.3388	0.1422	72.13	61.0392	73.51	60.25	2.3825	1	1	1	0
600	2007-08-30	30.0571	0.342	0.14327	71.9	61.161	73.36	61.1	2.388	1	1	1	1
601	2007-08-31	30.3907	0.3355	0.14017	72.69	61.3973	74.04	61.45	2.3936	0	0	1	1
602	2007-09-07	30.244	0.3259	0.13542	75.07	61.4116	76.7	62.85	2.4069	0	0	1	1
603	2007-09-10	30.1305	0.3259	0.13579	75.48	60.7742	77.49	62.55	2.4	1	1	0	0
604	2007-09-12	30.0438	0.3259	0.13656	77.68	62.7724	79.91	62.15	2.386	1	1	1	0
605	2007-09-13	30.5108	0.3226	0.13443	77.4	63.4671	80.09	62.45	2.3922	0	0	1	1
606	2007-09-14	30.5242	0.3226	0.13306	76.22	63.5029	79.1	63.15	2.4227	1	0	1	1
607	2007-09-19	33.1596	0.3323	0.13764	78.47	65.9737	81.93	68.65	2.4146	1	1	1	1
608	2007-09-20	33.1529	0.3291	0.13559	79.09	65.9522	83.32	68.82	2.4261	0	0	0	1
609	2007-09-24	34.4073	0.3388	0.14097	78.91	65.6943	80.95	71.8	2.4038	1	1	0	1
610	2007-09-25	32.6926	0.3291	0.13726	77.62	65.859	79.53	69.15	2.3956	0	0	1	0
611	2007-09-26	31.8319	0.3259	0.13612	77.43	66.1527	80.3	67.35	2.3931	0	0	1	0
612	2007-09-27	31.5917	0.3226	0.1353	80.03	66.5824	82.88	66.7	2.389	0	0	1	0
613	2007-09-28	31.2447	0.3226	0.13748	79.17	66.2887	81.66	66.3	2.3403	1	1	0	0
614	2007-10-01	32.0054	0.3226	0.13675	77.64	67.2842	80.24	68.15	2.3568	1	0	1	1
615	2007-10-03	33.0528	0.3388	0.14215	77.19	65.4079	79.94	69.7	2.3886	1	1	0	1
616	2007-10-04	32.4924	0.342	0.14344	78.97	65.1142	81.44	68.45	2.3859	1	1	0	0
617	2007-10-08	32.6258	0.3581	0.15035	76.58	64.9424	79.02	68.97	2.3849	1	1	0	1
618	2007-10-10	32.4924	0.3549	0.15075	78.6	66.697	81.3	68.65	2.3579	0	1	1	0
619	2007-10-12	33.1596	0.342	0.1451	80.55	66.9477	83.69	70.65	2.3559	0	0	1	1
620	2007-10-15	32.7326	0.3452	0.14701	82.75	67.9073	86.13	69.8	2.3529	1	1	1	0
621	2007-10-23	33.3597	0.3549	0.15013	82.85	65.4222	85.27	71	2.3641	1	1	0	1
622	2007-10-25	33.3597	0.342	0.14615	87.48	65.5798	90.46	72.15	2.3384	0	0	1	1
623	2007-11-05	32.9327	0.3355	0.14441	90.49	62.7795	93.98	71.4	2.3238	0	0	0	0
624	2007-11-08	34.3005	0.3291	0.14189	92.79	64.2889	95.46	75.4	2.3144	0	0	1	1
625	2007-11-12	33.0261	0.3226	0.13613	91.98	60.7804	94.62	72	2.3694	0	0	0	0
626	2007-11-13	32.9928	0.3213	0.13558	88.83	62.4628	91.17	72.6	2.3695	0	0	1	1
627	2007-11-16	33.6934	0.3194	0.13439	91.62	61.1831	95.1	74.25	2.3807	0	0	0	1
628	2007-11-20	32.8794	0.313	0.13224	95.49	63.1386	98.03	71.75	2.3645	0	0	1	0
629	2007-11-21	32.2922	0.3149	0.13175	94.84	62.5778	97.29	71.75	2.3905	1	0	0	1
630	2007-11-23	31.4116	0.3226	0.13256	95.76	63.4765	98.18	70.4	2.4403	1	1	1	0
631	2007-11-26	31.3649	0.3188	0.13154	95.32	61.6	97.7	69.3	2.4219	0	0	0	0
632	2007-11-28	31.3982	0.3104	0.12964	89.81	63.2105	90.62	69.94	2.4015	0	0	1	1
633	2007-11-29	32.0321	0.3162	0.13197	90.22	63.6922	91.01	70.25	2.3955	1	1	1	1
634	2007-12-04	32.499	0.3162	0.13083	89.53	63.3543	88.32	72.3	2.4142	1	0	0	1
635	2007-12-05	33.0261	0.3194	0.13263	88.49	64.6484	87.49	72.9	2.4058	1	1	1	1
636	2007-12-06	33.7534	0.3226	0.13427	90.18	65.7412	90.23	74.3	2.403	1	1	1	1
637	2007-12-11	32.5191	0.3226	0.1348	89.99	64.9073	90.02	70.3	2.3923	1	1	0	0
638	2007-12-12	32.9261	0.3207	0.13383	94.02	66.0863	94.39	72	2.3963	0	0	1	1
639	2007-12-17	33.8535	0.3181	0.12934	91.29	64.6269	90.63	73.3	2.4561	0	0	0	1
640	2007-12-18	34.1604	0.3291	0.13403	90.12	65.7268	90.49	73.95	2.4548	1	1	1	1
641	2007-12-20	35.855	0.3323	0.13554	90.88	66.2373	91.06	76.2	2.452	1	1	1	1
642	2008-01-03	37.6298	0.322	0.13186	97.6	67.4595	99.18	83.1	2.445	0	0	1	1
643	2008-01-10	35.5615	0.3136	0.12684	92.22	65.8994	93.71	79.32	2.4768	0	0	0	0
644	2008-01-14	34.7875	0.3046	0.12238	92.92	65.3026	94.2	78	2.4942	0	0	0	0
645	2008-01-15	33.5599	0.302	0.12109	90.98	64.0014	91.9	74.75	2.4974	0	0	0	0
646	2008-01-16	32.5658	0.2904	0.11519	89.75	62.2111	90.84	71.8	2.5217	0	0	0	0
647	2008-01-17	32.1254	0.2865	0.11444	88.75	60.3275	90.13	70	2.5089	0	0	0	0
648	2008-01-22	30.3574	0.2633	0.10238	88.45	59.2778	89.85	66.5	2.5785	0	0	0	0
649	2008-01-23	29.0897	0.26	0.10021	86.62	59.9968	86.99	64	2.592	0	0	1	0
650	2008-01-24	31.3581	0.2646	0.10364	89.07	61.8301	89.41	68.25	2.5515	1	1	1	1
651	2008-01-25	31.4916	0.2755	0.10658	90.9	60.3491	90.71	69.36	2.5796	1	1	0	1
652	2008-01-28	30.5375	0.2607	0.10242	91.38	61.2046	90.99	67.4	2.5469	0	0	1	0
653	2008-01-29	31.7985	0.2652	0.10496	92	61.1687	91.64	71	2.5253	1	1	0	1
654	2008-01-30	31.5517	0.2665	0.106	92.53	61.3125	92.33	69.95	2.5145	1	1	1	0
655	2008-01-31	32.0254	0.2529	0.1009	92.21	61.6144	91.75	71.6	2.5105	0	0	1	1
656	2008-02-04	32.7259	0.2517	0.10294	90.47	61.4275	90.02	71.7	2.4447	0	1	0	1
657	2008-02-05	33.293	0.242	0.09702	88.82	59.0334	88.41	71.8	2.4975	0	0	0	1
658	2008-02-07	31.5383	0.2458	0.0967	88.51	59.1293	88.11	69.25	2.5413	1	0	1	0
659	2008-02-08	31.2314	0.2465	0.09732	91.94	58.9994	91.77	67	2.5307	1	1	0	0
660	2008-02-11	31.2514	0.24	0.09533	93.53	60.0897	93.59	68.2	2.5155	0	0	1	1
661	2008-02-12	32.0321	0.2388	0.09608	92.86	60.9272	92.78	70.05	2.4907	0	1	1	1
662	2008-02-13	32.5457	0.2381	0.09514	93.32	61.7287	93.27	71.1	2.4953	0	0	1	1
663	2008-02-14	32.4858	0.242	0.09712	95.09	61.7721	95.46	71.72	2.4915	1	1	1	1
664	2008-02-15	31.6984	0.2368	0.0953	94.63	61.6421	95.5	70.1	2.4862	0	0	0	0
665	2008-02-19	32.9194	0.2394	0.097	98.56	62.8262	100.01	71.25	2.468	1	1	1	1
666	2008-02-21	32.5924	0.2588	0.10492	96.24	62.7613	98.23	73.1	2.4668	1	1	0	1
667	2008-02-22	32.1788	0.2588	0.10498	97.01	62.9418	98.81	71.2	2.4775	1	1	1	0
668	2008-02-26	32.2922	0.2704	0.11035	99.47	64.9058	100.88	72.35	2.4429	1	1	1	1
669	2008-02-28	32.4257	0.2613	0.10854	100.9	64.5376	102.59	73.65	2.4086	0	0	0	1
670	2008-02-29	31.9586	0.2555	0.10354	100.1	62.8262	101.84	72.74	2.468	0	0	0	0
671	2008-03-04	30.2239	0.2517	0.10273	97.52	62.5952	99.52	68.89	2.4622	0	0	0	0
672	2008-03-07	29.1898	0.2536	0.10466	102.38	59.5626	105.15	66.9	2.4231	1	1	0	0
673	2008-03-10	29.2899	0.2581	0.10639	104.16	59.5409	107.9	67.25	2.428	1	1	0	1
674	2008-03-17	27.3416	0.2678	0.11248	101.75	61.9454	105.68	65.6	2.3822	1	1	1	0
675	2008-03-18	27.6552	0.2781	0.11792	105.56	63.8805	109.42	65.8	2.3577	1	1	1	1
676	2008-03-25	27.7953	0.2594	0.10878	100.6	61.5193	101.22	64.7	2.3798	0	0	0	0
677	2008-03-26	27.5285	0.2646	0.11255	103.99	62.2847	105.9	64.75	2.3519	1	1	1	1
678	2008-03-27	28.1289	0.2646	0.11261	105	62.2414	107.58	66.66	2.3491	1	1	0	1
679	2008-03-28	28.4892	0.2678	0.11352	103.77	61.5338	105.62	67	2.3596	1	1	0	1
680	2008-03-31	27.9288	0.2678	0.1135	100.3	61.0717	101.58	65.95	2.3621	1	0	0	0
681	2008-04-07	29.9771	0.2781	0.11902	107.14	64.2054	109.09	70.85	2.3378	1	1	1	1
682	2008-04-08	30.0304	0.2807	0.1202	106.34	64.7036	108.5	71.41	2.3363	1	1	1	1
683	2008-04-09	30.3907	0.2813	0.12148	108.47	64.7686	110.87	72.2	2.3167	1	1	1	1
684	2008-04-11	30.3574	0.2775	0.12083	108.75	63.9888	110.14	72.55	2.296	0	0	0	1
685	2008-04-14	30.1505	0.2678	0.11692	109.84	64.7686	111.76	71.5	2.29	0	0	1	0
686	2008-04-15	30.8645	0.2749	0.11986	111.31	65.5629	113.79	73.79	2.2945	1	1	1	1
687	2008-04-16	31.0913	0.2878	0.1268	112.66	67.072	114.93	75	2.2718	1	1	1	1
688	2008-04-17	31.3114	0.2904	0.128	112.43	67.4258	114.86	75.05	2.2771	1	1	1	1
689	2008-04-21	31.5583	0.302	0.13467	114.43	68.0612	117.48	75.9	2.2435	1	1	1	1
690	2008-04-25	31.505	0.3188	0.13693	116.34	66.7615	118.52	74.2	2.3267	1	1	0	0
691	2008-05-05	33.253	0.3142	0.134	117.99	64.6314	119.97	77.25	2.3391	0	0	0	1
692	2008-05-06	33.5399	0.3162	0.13403	120.31	65.0358	121.84	78.75	2.3559	1	1	1	1
693	2008-05-08	34.0937	0.329	0.13756	122.84	64.9347	123.69	78.4	2.3926	1	1	0	0
694	2008-05-13	34.7875	0.329	0.13967	124.1	65.0434	125.8	80.4	2.3601	1	1	1	1
695	2008-05-14	34.981	0.3324	0.1404	121.86	65.2103	124.22	79.15	2.365	1	1	1	0
696	2008-05-16	36.9025	0.3559	0.15214	124.99	67.2121	126.29	85.1	2.3398	1	1	1	1
697	2008-05-19	37.5492	0.3592	0.15374	125.06	68.4378	127.05	85.65	2.337	1	1	1	1
698	2008-05-21	38.8464	0.3592	0.15518	132.7	67.9373	133.17	88.74	2.3095	1	1	0	1
699	2008-05-23	37.8291	0.3525	0.15173	131.57	65.7832	132.19	87.9	2.3252	0	0	0	0
700	2008-05-27	36.7982	0.3525	0.15092	128.31	65.1305	128.85	85	2.3422	1	0	0	0
701	2008-05-28	36.5047	0.3592	0.153	130.93	65.5874	131.03	83.4	2.3435	1	1	1	0
702	2008-05-30	36.1292	0.3693	0.15831	127.78	64.3762	127.35	81.9	2.3289	1	1	0	0
703	2008-06-02	35.7741	0.376	0.16219	128.02	63.6872	127.76	82.05	2.3207	1	1	0	1
704	2008-06-03	36.4091	0.3659	0.15594	124.58	62.1641	124.31	82.15	2.3437	0	0	0	1
705	2008-06-04	35.2758	0.3492	0.14877	122.1	62.1931	122.3	79.16	2.3507	0	0	1	0
706	2008-06-05	35.2553	0.3525	0.15054	127.54	64.7751	127.79	80	2.3236	1	1	1	1
707	2008-06-11	35.3167	0.3492	0.14786	135.02	64.2674	136.38	80.95	2.3637	0	0	0	1
708	2008-06-12	35.6786	0.3424	0.14383	136.09	63.1432	136.74	79.8	2.3733	0	0	0	0
709	2008-06-13	35.0983	0.3458	0.14505	134.25	64.0861	134.86	79.7	2.3812	1	1	1	0
710	2008-06-16	35.2143	0.3492	0.14743	134.71	63.8177	134.61	79.7	2.3737	1	1	0	1
711	2008-06-17	34.8184	0.3525	0.14951	133.72	64.2747	134.01	79.3	2.3583	1	1	1	0
712	2008-06-18	34.4566	0.3391	0.14347	136.44	63.7017	136.68	77.9	2.3562	0	0	0	0
713	2008-06-23	33.3778	0.3223	0.1361	135.91	63.6074	136.74	76.1	2.3663	0	0	0	0
714	2008-06-24	33.7806	0.3189	0.1353	136.46	63.0417	137	77.95	2.3607	0	0	0	1
715	2008-06-25	33.6236	0.3122	0.13319	134.33	63.5349	134.55	77.55	2.3316	0	0	1	0
716	2008-06-26	33.0843	0.3062	0.13179	139.83	62.6718	139.64	76.41	2.3212	0	0	0	0
717	2008-06-27	33.5417	0.3102	0.13388	140.31	62.7733	140.21	77.45	2.311	1	1	1	1
718	2008-06-30	34.0401	0.3109	0.13405	139.83	63.9193	140	79.55	2.3133	1	1	1	1
719	2008-07-02	33.1116	0.3156	0.13755	144.26	63.3971	143.57	76.5	2.287	1	1	0	0
720	2008-07-07	33.453	0.3035	0.1331	141.87	63.0634	141.37	76.95	2.2813	0	0	0	1
721	2008-07-09	32.7839	0.3001	0.13352	136.58	61.1487	136.05	75.3	2.2456	0	1	0	0
722	2008-07-10	32.3606	0.2961	0.13066	142.03	62.4179	141.65	75.05	2.2496	0	0	1	0
723	2008-07-11	31.7257	0.286	0.12627	144.49	61.9973	145.08	74.95	2.2586	0	0	0	0
724	2008-07-15	29.1655	0.2719	0.12008	138.75	59.6111	138.74	68.5	2.2593	0	0	0	0
725	2008-07-16	29.1519	0.2632	0.11635	136.19	58.6102	134.6	67.2	2.2639	0	0	0	0
726	2008-07-24	28.5511	0.2934	0.12842	126.44	58.6029	125.49	65.15	2.2787	1	1	0	0
727	2008-07-30	29.1519	0.3122	0.13771	127.1	61.1994	126.77	66.95	2.2622	1	1	1	1
728	2008-07-31	30.3124	0.3089	0.137	123.98	58.3346	124.08	69.2	2.2564	0	0	0	1
729	2008-08-04	29.698	0.327	0.14533	120.68	55.5567	121.41	67.26	2.2527	1	1	0	0
730	2008-08-05	28.8924	0.3277	0.14473	117.7	56.826	119.17	65.95	2.2635	1	0	1	0
731	2008-08-06	29.2611	0.3129	0.13872	117	56.8115	118.58	65.95	2.2599	0	0	0	1
732	2008-08-12	28.4487	0.3122	0.13153	111.15	56.0446	113.01	62.45	2.3674	0	0	0	0
733	2008-08-13	27.725	0.3022	0.12662	113.47	56.985	116	61.25	2.3907	0	0	1	0
734	2008-08-14	27.8274	0.3022	0.12635	112.64	56.4601	115.01	60.4	2.3846	1	0	0	0
735	2008-08-18	28.5647	0.2954	0.12352	111.94	55.7895	112.87	60.7	2.401	0	0	0	1
736	2008-08-19	27.7523	0.325	0.13639	113.25	56.8246	114.53	59.8	2.3864	1	1	1	0
737	2008-08-20	29.1245	0.3022	0.126	114.36	57.4516	114.98	62	2.396	0	0	1	1
738	2008-08-21	29.5819	0.2968	0.12513	120.16	58.5742	121.18	64.75	2.3704	0	0	1	1
739	2008-08-22	28.9607	0.2968	0.12456	113.92	58.5377	114.59	63.95	2.3815	1	0	0	0
740	2008-08-25	29.5341	0.2988	0.12537	114.03	57.3786	115.11	63.55	2.3857	1	1	0	0
741	2008-08-26	29.3772	0.2894	0.11909	114.63	58.2826	116.27	62.8	2.4223	0	0	1	0
742	2008-09-02	28.8105	0.28	0.11528	108.34	56.3654	109.71	60.3	2.4295	0	0	0	0
743	2008-09-03	28.1687	0.284	0.1161	108.06	56.8756	109.35	59.2	2.4422	1	1	1	0
744	2008-09-04	27.2402	0.2827	0.11351	106.3	55.5052	107.89	56.7	2.5175	0	0	0	0
745	2008-09-05	26.8989	0.276	0.10902	104.09	55.1261	106.23	56.25	2.5212	0	0	0	0
746	2008-09-08	27.2471	0.284	0.11154	103.44	55.9644	106.34	56.05	2.5439	1	1	1	0
747	2008-09-09	26.3527	0.2786	0.11029	100.34	53.4057	103.26	53.79	2.5362	0	0	0	0
748	2008-09-10	25.0692	0.2739	0.10676	98.97	54.8564	102.58	51.91	2.5688	0	0	1	0
749	2008-09-11	26.1615	0.2619	0.10052	97.64	55.0823	100.87	53.9	2.5804	0	0	1	1
750	2008-09-12	27.2402	0.2612	0.10272	97.58	56.4966	101.18	56.25	2.5363	0	1	1	1
751	2008-09-15	25.9636	0.2498	0.09791	92.38	53.3984	95.71	52.27	2.5416	0	0	0	0
752	2008-09-16	23.5877	0.237	0.09224	89.22	55.7166	91.15	48.75	2.5846	0	0	1	0
753	2008-09-17	22.9801	0.2444	0.0949	94.84	54.8782	97.16	48.81	2.5453	1	1	0	1
754	2008-09-18	22.0722	0.2343	0.09215	95.19	56.6788	97.88	46.2	2.5687	0	0	1	0
755	2008-09-19	24.2363	0.2484	0.09852	99.61	58.0347	104.55	51.5	2.5117	1	1	1	1
756	2008-09-22	24.6118	0.2504	0.10168	106.04	57.5026	120.92	53.25	2.4547	1	1	0	1
757	2008-09-23	23.6287	0.2417	0.09678	103.08	56.6351	106.61	51.9	2.4959	0	0	0	0
758	2008-09-24	24.0997	0.2417	0.09633	102.45	56.8829	105.73	50.8	2.5133	1	0	1	0
759	2008-09-25	23.3283	0.2404	0.09533	104.6	58.8075	108.02	49.75	2.5151	0	0	1	0
760	2008-09-29	20.2424	0.2283	0.08853	93.98	53.9889	96.37	44.5	2.5746	0	0	0	0
761	2008-09-30	20.0239	0.2128	0.07981	98.17	56.6132	100.64	41.15	2.6598	0	0	1	0
762	2008-10-01	20.4814	0.2216	0.08312	95.33	57.2839	98.53	42.1	2.6654	1	1	1	1
763	2008-10-02	18.5357	0.2202	0.07958	90.56	56.4966	93.97	38.05	2.7626	0	0	0	0
764	2008-10-03	19.0818	0.2196	0.07813	90.25	56.8173	93.88	37.4	2.8175	0	0	1	0
765	2008-10-06	19.1706	0.2081	0.07106	83.68	56.3654	87.81	33.9	2.941	0	0	0	0
766	2008-10-07	18.0919	0.1981	0.06884	84.66	55.4541	90.06	34.35	2.8961	0	0	0	1
767	2008-10-08	16.6582	0.1692	0.05943	84.36	56.1321	88.95	32.6	2.8561	0	0	1	0
768	2008-10-09	16.6036	0.1705	0.06068	82.66	49.5712	86.59	32.1	2.8299	1	1	0	0
769	2008-10-10	15.4976	0.145	0.05143	74.09	45.4597	77.7	31.9	2.8413	0	0	0	0
770	2008-10-13	17.6754	0.1598	0.05703	77.46	53.2744	81.19	34.6	2.7796	1	1	1	1
771	2008-10-14	19.7987	0.1813	0.0656	74.53	52.8225	78.63	38.85	2.7655	1	1	0	1
772	2008-10-15	19.7919	0.1611	0.05724	70.8	45.4524	74.54	39.15	2.8246	0	0	0	1
773	2008-10-17	15.7024	0.135	0.0495	69.6	49.6003	71.85	32.05	2.7416	0	0	1	0
774	2008-10-21	16.7265	0.1343	0.04859	69.72	52.1227	70.89	32.47	2.7722	0	0	1	1
775	2008-10-22	15.0129	0.1209	0.04383	64.52	47.0708	66.75	27.9	2.778	0	0	0	0
776	2008-10-23	14.4531	0.1141	0.04067	65.92	51.3135	67.84	28.55	2.7814	0	0	1	1
777	2008-10-27	13.6543	0.0866	0.02929	61.41	48.1788	63.22	25.75	2.9865	0	0	0	0
778	2008-10-28	14.5418	0.0994	0.03334	60.29	54.5721	62.73	27.81	2.9375	1	1	1	1
779	2008-11-06	16.6104	0.1343	0.04597	57.43	51	60.77	31.5	2.9197	1	1	0	1
780	2008-11-07	17.7505	0.135	0.0462	57.35	54.2187	61.04	31.95	2.9175	1	1	1	1
781	2008-11-11	17.2658	0.1376	0.04502	55.71	53.2655	59.33	32.2	3.0417	1	0	0	1
782	2008-11-13	15.5727	0.1222	0.03999	51.99	55.2891	58.24	28.25	2.9747	0	0	1	0
783	2008-11-14	15.2791	0.1309	0.04467	54.24	54.0207	57.04	27.55	2.9356	1	1	0	0
784	2008-11-18	15.0948	0.1195	0.0395	51.84	55.9637	54.39	26.85	3.0321	0	0	1	0
785	2008-11-19	12.9716	0.1188	0.03894	51.72	53.8301	53.62	25	3.0753	0	0	0	0
786	2008-11-24	12.2001	0.1188	0.04033	53.93	57.7746	54.5	22.92	2.9436	1	1	1	0
787	2008-11-25	13.4495	0.1262	0.04306	50.35	57.2687	50.77	24.5	2.9157	1	1	0	1
788	2008-11-26	13.3061	0.1215	0.0406	53.92	59.3069	54.44	24.1	2.9896	0	0	1	0
789	2008-12-02	12.9374	0.1209	0.04019	45.44	56.9021	46.96	23.2	2.9977	0	0	0	0
790	2008-12-04	12.3571	0.1215	0.04046	42.28	55.9196	43.67	23.3	3.0076	1	1	0	1
791	2008-12-05	11.6061	0.1202	0.03943	39.74	56.1616	40.81	22.1	3.0315	0	0	1	0
792	2008-12-09	12.3571	0.1229	0.04092	41.53	57.3347	42.07	23	3.0122	1	1	1	1
793	2008-12-10	12.835	0.1229	0.04108	42.4	58.7057	43.52	23.82	2.9913	1	1	1	1
794	2008-12-12	12.4254	0.1256	0.04253	46.41	58.9843	46.28	23.95	2.9343	1	1	1	1
795	2008-12-15	13.1764	0.1215	0.0421	44.6	58.6178	44.51	26.25	2.8679	0	0	0	1
796	2008-12-17	13.9205	0.1215	0.04409	45.53	59.4316	40.06	28.55	2.7511	1	1	1	1
797	2008-12-18	13.3402	0.1209	0.04365	43.36	56.4549	36.22	28.5	2.7809	0	0	0	0
798	2008-12-19	12.1181	0.1162	0.04096	44	55.0032	33.87	25.3	2.8221	0	0	0	0
799	2008-12-22	12.3503	0.1175	0.0417	41.45	54.9225	39.91	25.85	2.8102	1	1	0	1
800	2009-01-07	14.0365	0.1303	0.04317	45.86	57.3714	42.63	27.45	3.0198	1	1	1	1
801	2009-01-12	13.3743	0.1329	0.04125	42.91	56.1176	37.59	26.35	3.2321	1	0	0	0
802	2009-01-13	13.3811	0.1309	0.04082	44.83	57.1294	37.78	26.3	3.218	0	0	1	0
803	2009-01-14	12.8009	0.1296	0.03967	45.08	55.0618	37.28	24.95	3.2611	0	0	0	0
804	2009-01-16	13.7635	0.1282	0.03959	46.57	57.2614	36.51	26.89	3.2327	0	0	1	1
805	2009-01-20	12.8692	0.1202	0.03603	43.62	55.9343	38.74	24.2	3.3517	0	0	0	0
806	2009-01-26	13.1695	0.1094	0.03401	46.96	57.628	45.73	25.15	3.2125	0	0	1	1
807	2009-01-27	13.2173	0.1108	0.0345	43.73	57.8626	41.58	25.15	3.2069	1	1	1	1
808	2009-02-03	14.2687	0.1094	0.03298	44.08	57.2761	40.78	27.25	3.2988	0	0	0	1
809	2009-02-04	14.7739	0.1061	0.03167	44.15	56.9388	40.32	27.15	3.3561	0	0	0	0
810	2009-02-09	15.2245	0.1081	0.03332	46.02	58.5668	39.56	28.68	3.2538	1	1	1	1
811	2009-02-12	14.5076	0.1027	0.03061	44.65	55.4277	33.98	26.95	3.3453	0	0	0	0
812	2009-02-24	13.1423	0.088	0.02626	42.5	53.1213	39.96	25.1	3.3342	0	0	0	0
813	2009-02-25	13.5518	0.0819	0.02435	44.29	53.0918	42.5	24.35	3.3727	0	0	0	0
814	2009-02-27	14.2346	0.0806	0.02381	46.35	50.0338	44.76	26.25	3.3929	0	0	0	1
815	2009-03-03	12.9852	0.0779	0.02279	43.7	47.4253	41.65	24	3.4215	0	0	0	0
816	2009-03-06	13.859	0.0846	0.02499	44.85	47.1821	45.52	25.13	3.3937	1	1	0	1
817	2009-03-11	14.0707	0.0839	0.02505	41.4	48.4642	42.33	27.05	3.3378	0	1	1	1
818	2009-03-13	14.3711	0.094	0.02832	44.93	49.518	46.25	27	3.3144	1	1	1	0
819	2009-03-16	14.494	0.1007	0.03052	43.98	49.3485	47.35	27.3	3.3099	1	1	0	1
820	2009-03-19	15.0879	0.1014	0.03212	50.67	50.3506	51.61	30.03	3.1471	1	1	1	1
821	2009-03-20	15.6546	0.1021	0.03225	51.22	48.7	51.06	29.95	3.1649	1	1	0	0
822	2009-03-23	16.2759	0.1047	0.03323	53.47	51.9718	53.8	32.4	3.1573	1	1	1	1
823	2009-03-24	15.7024	0.1007	0.03167	53.5	51.1244	53.98	30.5	3.1902	0	0	0	0
824	2009-03-26	16.6241	0.1034	0.03305	53.46	52.4876	54.34	32.38	3.1318	1	1	1	1
825	2009-03-30	17.1361	0.0994	0.03095	47.99	50.5717	48.41	32.57	3.1989	0	0	0	1
826	2009-03-31	17.2044	0.1027	0.03207	49.23	50.1812	49.66	33	3.1981	1	1	0	1
827	2009-04-01	17.7847	0.1061	0.03315	48.44	51.0138	48.39	34.65	3.1943	1	1	1	1
828	2009-04-06	17.6754	0.1094	0.03519	52.24	51.6181	51.05	35.08	3.0995	1	1	1	1
829	2009-04-08	18.1602	0.1068	0.03402	51.59	50.8149	49.38	34.5	3.1389	0	0	0	0
830	2009-04-09	18.0577	0.1094	0.03483	54.06	51.4633	52.24	35.41	3.137	1	1	1	1
831	2009-04-14	17.6959	0.1088	0.03476	51.96	49.8864	49.41	34.35	3.1172	0	0	0	0
832	2009-04-15	17.5867	0.1128	0.03562	51.79	50.2106	49.25	33.82	3.1711	1	1	1	0
833	2009-04-17	16.508	0.1155	0.03575	53.35	49.1864	50.33	31.3	3.2316	1	1	0	0
834	2009-04-21	16.4329	0.1148	0.0351	49.82	48.8032	46.51	31	3.2702	0	0	0	0
835	2009-04-24	17.0064	0.1195	0.03748	51.67	49.0537	51.55	32.12	3.1986	1	1	1	1
836	2009-04-27	16.2759	0.1229	0.03826	50.32	48.7295	50.14	30.82	3.2347	1	1	0	0
837	2009-04-30	16.2008	0.1256	0.03953	50.8	49.1274	51.12	31.75	3.1757	1	1	1	1
838	2009-05-07	17.928	0.1403	0.04551	56.47	50.7928	56.71	35.33	3.0816	1	1	1	1
839	2009-05-11	16.6241	0.1397	0.04565	57.48	51.3479	58.5	32.4	3.0628	0	1	1	0
840	2009-05-12	16.8698	0.1383	0.04529	57.94	52.4969	58.85	33.05	3.0414	0	0	1	1
841	2009-05-13	16.7469	0.137	0.04466	57.34	51.7186	58.02	31.4	3.0655	0	0	0	0
842	2009-05-14	17.3955	0.1276	0.04156	56.69	51.7111	58.62	33.1	3.0581	0	0	0	1
843	2009-05-15	17.2795	0.1383	0.04471	55.98	51.2293	56.34	33.5	3.1048	1	1	0	1
844	2009-05-20	19.3382	0.1544	0.05117	60.59	51.5999	62.04	35.95	3.0143	1	1	1	1
845	2009-05-22	18.6344	0.1544	0.05182	60.78	51.0218	61.67	37.35	2.9815	1	1	0	1
846	2009-05-26	18.3429	0.1551	0.0519	61.24	51.7482	62.45	36.85	2.9905	1	1	1	0
847	2009-05-28	19.1392	0.1564	0.05184	64.39	51.3183	65.08	36.65	3.0138	1	0	0	0
848	2009-06-02	20.298	0.1746	0.05957	68.17	54.0535	68.55	40.88	2.9309	1	1	1	1
849	2009-06-03	19.8857	0.1752	0.05878	65.88	53.4309	66.12	40.1	2.9783	1	0	0	0
850	2009-06-04	19.644	0.1746	0.05875	68.71	54.098	68.81	39.75	2.9697	0	0	1	0
851	2009-06-09	20.9379	0.1746	0.0583	69.62	54.2018	70.01	41	2.981	1	0	1	1
852	2009-06-11	22.0399	0.1833	0.06158	71.79	54.8912	72.68	43.4	2.9728	1	1	1	1
853	2009-06-12	21.7413	0.1793	0.0599	70.92	54.6911	72.04	42.7	2.9939	0	0	0	0
854	2009-06-23	18.0514	0.1524	0.05074	68.8	51.1107	69.24	36.2	3.0087	0	0	0	0
855	2009-06-25	19.1249	0.1524	0.05035	69.78	51.8001	70.23	37.25	3.0172	1	0	1	1
856	2009-06-29	19.1961	0.1544	0.05157	70.99	52.319	71.49	37.8	2.9946	1	1	1	1
857	2009-06-30	18.9756	0.1591	0.0531	69.3	51.8223	69.89	37.76	2.9969	1	1	0	0
858	2009-07-06	17.8808	0.1544	0.05111	64.05	50.4806	64.05	35.46	3.0101	0	0	0	0
859	2009-07-07	17.9021	0.1625	0.05379	63.23	49.3391	62.93	35.4	3.0253	1	1	0	0
860	2009-07-09	17.4186	0.1578	0.05259	61.1	48.9017	60.41	34.67	3.005	0	0	0	0
861	2009-07-14	18.4353	0.1531	0.05067	60.86	49.087	59.52	36.35	3.0199	0	0	1	1
862	2009-07-16	19.1249	0.1618	0.05395	62.75	50.7475	62.02	37.35	2.9902	1	1	1	1
863	2009-07-20	19.0965	0.1672	0.05613	66.44	51.1033	63.98	37.85	2.9749	1	1	1	1
864	2009-07-21	19.5515	0.1739	0.05823	66.87	52.2374	64.72	38.45	2.9775	1	1	1	1
865	2009-07-22	19.2245	0.1658	0.05575	67.21	51.8816	65.4	38.8	2.9808	0	0	0	1
866	2009-07-31	19.8004	0.1699	0.05736	71.7	52.1781	69.45	39.89	2.9571	1	1	1	1
867	2009-08-06	18.5349	0.1746	0.05948	74.83	51.6889	71.94	37.1	2.9346	1	1	0	0
868	2009-08-07	18.4851	0.1732	0.05829	73.59	51.4962	70.93	37.05	2.9683	0	0	0	0
869	2009-08-11	18.8405	0.1786	0.05993	72.46	50.8114	69.45	37.42	2.9784	1	1	0	1
870	2009-08-14	19.5586	0.1799	0.06076	72.41	50.871	67.51	39.05	2.9674	1	1	1	1
871	2009-08-17	18.7624	0.1692	0.05643	70.54	49.633	66.75	37.35	3.0008	0	0	0	0
872	2009-08-26	19.7577	0.1786	0.0601	71.65	53.2277	71.43	39.95	2.9635	1	1	1	1
873	2009-08-31	19.5373	0.1699	0.05769	69.65	51.5721	69.96	38.86	2.9475	0	0	0	0
874	2009-09-01	19.4662	0.1726	0.0581	67.73	51.0202	68.05	38.9	2.9729	1	1	0	1
875	2009-09-11	20.7388	0.1746	0.05942	67.69	52.1911	69.29	42.4	2.9378	1	1	1	1
876	2009-09-14	20.1985	0.1705	0.05836	67.44	52.206	68.86	41.2	2.9219	0	0	1	0
877	2009-09-22	19.4733	0.1779	0.06192	70.53	52.0792	71.55	41.05	2.8705	1	1	0	0
878	2009-09-23	19.1961	0.1799	0.06287	67.99	51.4602	68.97	40.1	2.8715	1	1	0	0
879	2009-09-29	19.6581	0.1779	0.06191	65.49	51.5124	66.71	40.25	2.8751	0	0	1	1
880	2009-09-30	19.6013	0.1779	0.0618	69.07	51.1693	70.61	40.65	2.8847	1	0	0	1
881	2009-10-01	19.58	0.1732	0.05916	69.19	50.17	70.82	40.45	2.9299	0	0	0	0
882	2009-10-02	18.7339	0.1652	0.05641	68.07	49.6554	69.95	38.65	2.9327	0	0	0	0
883	2009-10-05	18.7126	0.1679	0.05765	68.04	50.4012	70.41	38.6	2.9132	1	1	1	0
884	2009-10-06	19.7435	0.1759	0.06075	68.56	51.2066	70.88	40.5	2.8959	1	1	1	1
885	2009-10-09	20.4758	0.1726	0.05928	70	51.6616	71.77	42.5	2.9069	0	0	1	1
886	2009-10-12	20.5469	0.1752	0.06052	71.36	52.3029	73.27	42.65	2.8964	1	1	1	1
887	2009-10-16	20.881	0.1833	0.06366	76.99	54.5329	78.53	43.87	2.8765	1	1	1	1
888	2009-10-19	21.2792	0.1914	0.06666	77.77	54.9058	79.61	44.16	2.8715	1	1	1	1
889	2009-10-21	21.0446	0.188	0.06581	79.69	54.6746	81.37	44.15	2.8625	0	0	0	0
890	2009-10-23	20.8028	0.1961	0.06869	78.92	54.8685	80.5	44.25	2.858	1	1	1	1
891	2009-10-29	19.8004	0.1779	0.06123	78.04	55.1593	79.87	41.6	2.9047	0	0	1	0
892	2009-11-03	19.0539	0.1679	0.05731	78.11	53.5037	79.6	39.9	2.9236	0	0	0	0
893	2009-11-06	20.3691	0.1652	0.05699	75.87	54.1302	77.43	42.22	2.8985	0	0	1	1
894	2009-11-16	21.5423	0.1773	0.06173	78.76	55.833	78.9	45.05	2.867	1	1	1	1
895	2009-11-18	21.6133	0.1746	0.06108	79.47	56.4631	79.58	45.45	2.8529	0	0	1	1
896	2009-11-19	21.3645	0.1739	0.06059	77.64	55.998	77.46	45.15	2.8673	0	0	0	0
897	2009-11-30	20.035	0.1712	0.06011	78.47	56.313	77.28	42.51	2.8422	0	0	1	0
898	2009-12-07	20.2554	0.1705	0.0598	76.43	55.3379	73.93	42.8	2.8541	0	0	0	1
899	2009-12-09	19.5231	0.1692	0.05854	72.39	54.6027	70.67	41.15	2.8887	0	0	0	0
900	2009-12-14	20.3336	0.1685	0.05814	71.89	52.2773	69.51	42.1	2.8969	0	0	0	1
901	2009-12-15	20.1985	0.1685	0.05757	72.05	51.8872	70.69	41.21	2.9201	1	0	0	0
902	2009-12-21	20.6749	0.1679	0.05698	72.99	51.3921	72.47	41.6	2.952	0	0	0	1
903	2009-12-23	21.3076	0.1665	0.05694	75.45	51.2046	76.67	43.15	2.9295	0	0	0	1
904	2010-01-04	22.2248	0.1692	0.05784	80.12	51.8722	81.51	45.4	2.9242	1	1	1	1
905	2010-01-05	22.4381	0.1779	0.06127	80.59	52.0748	81.77	45.5	2.9114	1	1	1	1
906	2010-01-07	22.6585	0.1813	0.06231	81.51	52.3598	82.66	45.65	2.9109	1	1	1	1
907	2010-01-08	22.2461	0.1873	0.06474	81.37	52.1498	82.75	46.58	2.8875	1	1	0	1
908	2010-01-11	23.1988	0.1947	0.0685	80.97	52.7349	82.52	47.15	2.8433	1	1	1	1
909	2010-01-19	22.6229	0.19	0.06598	77.63	51.9622	79.02	45.35	2.8815	0	0	0	0
910	2010-01-25	20.9521	0.1833	0.06301	73.69	49.3968	75.26	41.45	2.9076	0	0	0	0
911	2010-01-26	20.7104	0.1793	0.06127	73.29	49.4493	74.71	41.2	2.9315	0	0	1	0
912	2010-01-27	20.5469	0.1833	0.0623	72.24	49.1642	73.67	40.5	2.946	1	1	0	0
913	2010-01-29	20.3336	0.1867	0.06327	71.46	48.3316	72.89	39.9	2.9552	1	1	0	0
914	2010-02-01	20.7104	0.1907	0.06502	73.11	49.6443	74.43	40.95	2.9342	1	1	1	1
915	2010-02-02	20.6251	0.1907	0.06511	76.06	50.2294	77.23	40.86	2.9297	1	1	1	0
916	2010-02-04	20.81	0.1873	0.06226	72.13	48.5491	73.14	40.45	3.0072	0	0	0	0
917	2010-02-05	20.0563	0.1773	0.05834	69.59	48.6091	71.19	38.89	3.0318	0	0	1	0
918	2010-02-08	19.8431	0.1779	0.05889	70.11	48.5865	71.89	38.35	3.0299	1	1	0	0
919	2010-02-09	19.8217	0.1793	0.05988	72.13	49.2282	73.75	38.5	2.9935	1	1	1	1
920	2010-02-10	19.9639	0.1806	0.06026	72.54	48.964	74.52	38.9	2.9975	1	1	0	1
921	2010-02-11	20.0847	0.1806	0.06008	73.05	49.2584	75.28	38.55	3.0042	1	0	1	0
922	2010-02-12	19.7364	0.1793	0.05918	72.9	48.9262	74.13	37.9	3.0311	0	0	0	0
923	2010-02-17	20.49	0.182	0.06011	76.27	49.6511	77.33	39.1	3.0267	1	1	1	1
924	2010-02-23	21.0801	0.188	0.06156	77.25	49.0319	78.86	39.87	3.0529	1	1	0	1
925	2010-02-24	20.8455	0.1893	0.06218	78.09	49.4925	80	39.6	3.0463	1	1	1	0
926	2010-02-25	20.0421	0.1873	0.06142	76.29	49.1829	78.17	37.95	3.0411	0	0	0	0
927	2010-02-26	19.3382	0.1846	0.06113	77.59	49.0772	79.66	37.15	3.0186	0	0	0	0
928	2010-03-01	19.4235	0.1867	0.06148	76.89	49.3793	78.7	36.95	3.0286	1	1	1	0
929	2010-03-02	19.6226	0.188	0.06223	78.18	49.4472	79.68	37.4	3.018	1	1	1	1
930	2010-03-08	19.4805	0.1907	0.06355	80.47	50.1947	81.87	37.03	3.0029	1	1	1	0
931	2010-03-09	19.3738	0.1907	0.06329	79.91	50.4212	81.49	37.45	3.0124	1	0	1	1
932	2010-03-10	19.644	0.1914	0.06381	80.48	50.7534	82.09	37.5	2.9978	1	1	1	1
933	2010-03-22	19.1392	0.2216	0.07355	80.54	50.5647	81.25	36.35	3.0128	1	1	0	0
934	2010-03-23	19.3027	0.2269	0.07525	80.7	50.5496	81.91	37.15	3.0126	1	1	0	1
935	2010-03-24	19.3454	0.2229	0.07332	79.62	50.2098	80.61	36.5	3.0454	0	0	0	0
936	2010-03-29	19.4449	0.2283	0.0754	81.17	50.8138	82.17	36.65	3.0161	1	1	1	1
937	2010-03-31	19.7506	0.231	0.07633	82.7	50.5722	83.76	37.15	3.0279	1	1	0	1
938	2010-04-08	21.5067	0.2444	0.07917	84.81	51.2366	85.39	40	3.0834	1	1	1	1
939	2010-04-09	21.7697	0.2457	0.08006	84.83	51.9162	84.92	41.03	3.0612	1	1	1	1
940	2010-04-13	21.72	0.2357	0.07728	84.72	51.8407	84.05	41.55	3.0415	0	0	0	1
941	2010-04-16	20.9593	0.2357	0.07665	85.99	51.2895	83.24	39.52	3.0731	1	0	0	0
942	2010-04-19	20.6037	0.231	0.07487	84.23	51.516	81.45	39.15	3.0803	0	0	1	0
943	2010-04-20	20.7531	0.2296	0.07438	84.8	52.0747	83.45	39.4	3.0844	0	0	1	1
944	2010-04-28	19.5871	0.2182	0.06936	86.16	52.2408	83.22	36.4	3.136	0	0	1	0
945	2010-05-03	19.516	0.2155	0.06891	88.94	51.2215	86.19	36.15	3.1285	0	0	0	0
946	2010-05-05	18.5135	0.2014	0.06203	82.61	49.9606	79.97	33.75	3.2666	0	0	0	0
947	2010-05-06	18.2718	0.2021	0.06153	79.83	48.2392	77.11	32	3.333	1	0	0	0
948	2010-05-07	17.3049	0.2014	0.06094	78.27	48.0957	75.11	31.45	3.2867	0	0	0	0
949	2010-05-10	18.4851	0.2128	0.06545	80.12	49.2509	76.8	32.95	3.2588	1	1	1	1
950	2010-05-14	18.7197	0.2095	0.0622	77.18	48.3463	71.61	32.55	3.3867	0	0	0	0
951	2010-05-17	18.7695	0.1974	0.05797	75.1	48.0955	70.08	33.1	3.3853	0	0	0	1
952	2010-05-18	19.3382	0.1961	0.05766	74.43	47.7306	69.41	32.53	3.4459	0	0	0	0
953	2010-05-20	18.1012	0.2075	0.06091	71.84	45.8606	68.01	31.75	3.3706	1	1	0	0
954	2010-05-25	17.895	0.1712	0.05027	69.55	45.3893	68.75	30.75	3.3788	0	0	0	0
955	2010-05-26	18.2718	0.192	0.05634	71.74	45.0852	71.51	30.61	3.4228	1	1	0	0
956	2010-05-27	18.7339	0.1981	0.05884	74.66	46.7196	74.55	31.06	3.359	1	1	1	1
957	2010-05-28	19.1249	0.2014	0.05953	74.02	45.9594	73.97	31.92	3.3967	1	1	0	1
958	2010-06-01	18.8707	0.1947	0.05722	72.71	45.0396	72.58	31.3	3.4176	0	0	0	0
959	2010-06-02	18.7969	0.1987	0.05817	73.75	46.195	72.86	31.15	3.4137	1	1	1	0
960	2010-06-14	19.9047	0.1887	0.05469	75.2	46.6511	75.12	32.45	3.4585	0	0	1	1
961	2010-06-15	19.7422	0.1987	0.05798	76.2	47.5177	76.94	33	3.4272	1	1	1	1
962	2010-06-18	19.2326	0.2081	0.06068	78.22	47.9662	77.18	32.65	3.4228	1	1	1	0
963	2010-06-22	19.7201	0.2122	0.06179	78.04	47.0844	77.21	32.65	3.4449	1	1	0	1
964	2010-06-23	19.1366	0.2149	0.06227	76.27	46.4459	76.35	32.2	3.4305	1	1	0	0
965	2010-06-24	18.8929	0.2122	0.06192	76.47	45.6629	76.51	31.65	3.4346	0	0	0	0
966	2010-06-25	18.4719	0.2081	0.06009	78.12	44.9256	78.86	31.15	3.4574	0	0	0	0
967	2010-06-28	18.7969	0.2048	0.05766	77.59	44.4467	78.25	31.35	3.5589	0	0	0	1
968	2010-06-29	18.1506	0.1967	0.05475	75.44	43.5497	75.94	29.95	3.6001	0	0	0	0
969	2010-06-30	18.2724	0.2034	0.05713	75.01	43.3825	75.63	30.45	3.5655	1	1	0	1
970	2010-07-06	17.8146	0.1994	0.05949	71.45	43.6789	71.98	30.45	3.3539	0	1	1	1
971	2010-07-13	19.2252	0.2001	0.05967	76.65	45.1688	77.15	33	3.3445	1	1	1	1
972	2010-07-14	19.0295	0.1994	0.05987	76.77	45.0472	77.04	33.05	3.3416	0	1	0	1
973	2010-07-15	18.9224	0.2001	0.06038	76.19	45.0548	76.62	32.95	3.3024	1	1	1	0
974	2010-07-19	18.1765	0.2028	0.06153	75.62	44.4163	76.54	32.03	3.2954	1	1	0	0
975	2010-07-21	18.3611	0.2041	0.0613	75.37	44.2186	76.56	31.82	3.3445	1	0	0	0
976	2010-07-26	18.7895	0.2068	0.06326	77.5	45.9062	78.98	33.2	3.2674	1	1	1	1
977	2010-07-27	18.8375	0.2135	0.06522	76.13	46.2254	77.5	33.2	3.2708	1	1	1	1
978	2010-07-28	18.9372	0.2135	0.06525	76.06	46.3015	76.99	33.55	3.2713	1	1	1	1
979	2010-07-29	18.9519	0.2115	0.06508	77.59	45.8682	78.36	33.9	3.2506	0	0	0	1
980	2010-07-30	18.9704	0.2095	0.06431	78.18	45.3665	78.95	33.39	3.2572	0	0	0	0
981	2010-08-10	19.4541	0.2189	0.06775	79.6	47.0768	80.25	34.5	3.2143	1	1	1	1
982	2010-08-11	19.0553	0.2182	0.06631	77.64	46.2347	78.02	33.3	3.3027	0	0	0	0
983	2010-08-12	18.8929	0.2216	0.0673	75.52	46.1122	75.74	33.1	3.2965	1	1	0	0
984	2010-08-19	19.3655	0.2263	0.06855	75.3	45.3925	74.43	33.69	3.3008	1	1	0	1
985	2010-08-24	19.1145	0.2216	0.06625	72.38	45.1246	71.63	32.7	3.3561	0	0	0	0
986	2010-08-25	18.9889	0.2216	0.06614	73.48	45.1016	72.52	32.25	3.3525	1	0	0	0
987	2010-09-01	19.1957	0.2182	0.06552	76.35	46.6328	73.91	33	3.3298	0	0	1	1
988	2010-09-07	19.5539	0.2202	0.06539	77.74	46.3572	74.09	33.55	3.3784	1	0	0	1
989	2010-09-09	19.7828	0.2229	0.06618	77.47	46.74	74.25	33.95	3.3706	1	1	1	1
990	2010-09-13	19.8456	0.2222	0.0671	79.03	46.7017	77.19	34.45	3.3079	0	1	0	1
991	2010-09-21	20.082	0.2222	0.06853	78.42	47.1151	73.52	35.7	3.212	1	1	1	1
992	2010-09-28	19.8567	0.2243	0.07135	78.71	47.5132	76.18	36.25	3.1402	1	1	1	1
993	2010-09-29	20.1854	0.2229	0.07112	80.77	47.1534	77.86	37.31	3.1349	0	0	0	1
994	2010-09-30	20.2814	0.2283	0.07284	82.31	47.3065	79.97	37.6	3.13	1	1	1	1
995	2010-10-01	20.8649	0.2249	0.07243	83.75	47.8807	81.58	38.86	3.0913	0	0	1	1
996	2010-10-04	20.6802	0.2222	0.07117	83.28	47.6128	81.47	38.5	3.1226	0	0	0	0
997	2010-10-07	21.0495	0.2249	0.07314	83.43	48.8837	81.67	39.7	3.0661	1	1	1	1
998	2010-10-12	20.791	0.2263	0.07335	83.5	49.5344	81.67	39.3	3.0717	1	1	1	0
999	2010-10-14	21.2046	0.2249	0.07382	84.53	49.9938	82.69	40.25	3.0415	0	1	1	1
1000	2010-10-15	21.1382	0.2276	0.07451	82.45	49.9096	81.25	40.16	3.0602	1	1	0	0
1001	2010-10-18	21.4557	0.2269	0.07406	84.37	50.7441	83.08	40.59	3.0716	0	0	1	1
1002	2010-10-19	21.1714	0.2276	0.07311	81.1	49.856	79.49	39.15	3.1303	1	0	0	0
1003	2010-10-20	21.0016	0.2263	0.07332	83.6	50.5374	81.77	39.6	3.0857	0	1	1	1
1004	2010-10-21	20.0931	0.2269	0.0733	81.83	50.7747	80.56	37.85	3.1018	1	0	1	0
1005	2010-10-25	20.1521	0.2236	0.07315	83.54	50.6828	82.52	38.1	3.0553	0	0	0	1
1006	2010-10-27	19.7533	0.2222	0.07159	83.23	50.2771	81.94	36.75	3.1059	0	0	0	0
1007	2010-10-29	19.8272	0.2236	0.07291	83.15	50.9048	81.43	37.5	3.0599	1	1	1	1
1008	2010-11-08	20.1817	0.2243	0.07293	88.46	53.8371	87.06	38.35	3.0798	1	1	1	1
1009	2010-11-09	20.5104	0.2249	0.0727	88.33	54.4149	86.72	38	3.1076	1	0	1	0
1010	2010-11-11	20.2371	0.2269	0.07232	88.81	55.3394	87.81	37.49	3.1364	1	0	1	0
1011	2010-11-16	19.9601	0.2243	0.0704	84.73	53.1129	82.34	36.5	3.1843	0	0	0	0
1012	2010-11-17	19.7828	0.2229	0.07022	83.28	53.1668	80.44	36.4	3.1768	0	0	1	0
1013	2010-11-18	20.0893	0.2243	0.07102	85.05	54.1684	81.85	36.8	3.1526	1	1	1	1
1014	2010-11-19	20.034	0.2222	0.07054	84.34	54.3456	81.51	37.1	3.1427	0	0	1	1
1015	2010-11-23	19.5946	0.2216	0.06881	83.25	53.1437	81.25	36.1	3.2244	0	0	0	0
1016	2010-11-24	19.4468	0.2236	0.06945	85.84	53.8371	83.86	35.1	3.2279	1	1	1	0
1017	2010-11-26	19.7349	0.2162	0.06633	85.58	53.3363	83.76	35.23	3.2571	0	0	0	1
1018	2010-11-30	19.1218	0.2202	0.06681	85.92	53.5906	84.11	33.9	3.311	1	1	1	0
1019	2010-12-03	20.0082	0.2236	0.06945	91.42	54.8464	89.19	36.2	3.2083	1	1	1	1
1020	2010-12-09	21.2083	0.2216	0.06812	90.99	55.4704	88.37	38.02	3.2456	0	0	1	1
1021	2010-12-10	21.1492	0.2216	0.06826	90.48	55.6091	87.79	38.1	3.245	1	1	1	1
1022	2010-12-13	21.308	0.2216	0.06912	91.19	55.7477	88.61	38.55	3.202	1	1	1	1
1023	2010-12-16	21.404	0.2202	0.06788	91.71	55.6399	87.7	38.25	3.242	0	0	0	0
1024	2010-12-20	22.379	0.2184	0.06679	92.74	55.6399	88.81	39.95	3.2692	0	0	1	1
1025	2010-12-22	22.6486	0.2189	0.06685	93.65	56.0867	90.48	40.3	3.27	1	1	1	1
1026	2010-12-23	22.5082	0.2249	0.0688	94.25	56.3949	91.51	39.85	3.2664	1	1	1	0
1027	2010-12-27	22.7372	0.2249	0.06888	93.85	56.2485	91	40.25	3.2572	1	1	0	1
1028	2010-12-29	23.28	0.2249	0.06899	94.14	56.5259	91.12	41.67	3.2511	1	1	1	1
1029	2010-12-30	22.9698	0.2249	0.06955	93.09	56.5182	89.84	41.8	3.2272	1	1	0	1
1030	2011-01-03	23.2283	0.229	0.07166	94.84	57.435	91.55	41.8	3.1992	1	1	1	1
1031	2011-01-04	22.896	0.235	0.07326	93.53	57.7046	89.38	41.55	3.2061	1	1	1	0
1032	2011-01-05	22.9846	0.235	0.0726	95.5	57.5505	90.3	41.12	3.246	1	0	0	0
1033	2011-01-13	23.1397	0.2449	0.07677	98.06	59.0991	91.4	41.9	3.1894	1	1	1	1
1034	2011-01-14	23.1102	0.2444	0.0765	98.68	59.9697	91.54	42.05	3.1897	0	0	1	1
1035	2011-01-18	23.3982	0.2477	0.07771	97.8	60.6399	91.38	42.35	3.1803	1	1	1	1
1036	2011-01-19	23.9411	0.2509	0.07935	98.16	60.2778	90.86	43.95	3.1639	1	1	0	1
1037	2011-01-20	23.4869	0.2484	0.0784	96.58	59.9003	88.86	42.78	3.1681	0	0	0	0
1038	2011-01-21	23.3613	0.2464	0.07839	97.6	60.8479	89.11	43.35	3.1358	0	0	1	1
1039	2011-01-24	23.8488	0.2471	0.07902	96.61	60.5475	87.87	43.25	3.1287	1	1	0	0
1040	2011-01-25	23.4204	0.2478	0.07933	95.25	60.6168	86.19	43.3	3.1084	1	1	1	1
1041	2011-01-26	23.6345	0.2457	0.0788	97.91	61.3718	87.33	43.75	3.1151	0	0	1	1
1042	2011-01-27	24.3731	0.2444	0.07852	97.39	61.5413	85.64	45.45	3.1101	0	0	1	1
1043	2011-01-28	23.7823	0.2449	0.07829	99.42	60.8556	89.34	43.99	3.1303	1	0	0	0
1044	2011-01-31	23.93	0.2417	0.07775	101.01	62.1577	92.19	44.5	3.1098	0	0	1	1
1045	2011-02-01	25.0674	0.2431	0.07894	101.74	64.6461	90.77	46.55	3.0792	1	1	1	1
1046	2011-02-03	25.049	0.2478	0.07935	101.76	64.284	90.54	45.85	3.1266	1	1	0	0
1047	2011-02-04	24.1073	0.2491	0.07944	99.83	64.1608	89.03	45	3.1341	1	1	0	0
1048	2011-02-07	24.41	0.2529	0.08043	99.25	64.6615	87.48	44.75	3.1345	1	1	1	0
1049	2011-02-08	24.8199	0.2528	0.08119	99.92	64.2665	86.94	45.49	3.1223	0	1	0	1
1050	2011-02-15	25.5401	0.2498	0.07937	101.64	64.2588	84.32	46.85	3.1525	0	0	0	1
1051	2011-02-18	25.0969	0.2484	0.08005	102.52	65.4438	86.2	45.95	3.0985	0	1	1	0
1052	2011-02-22	23.568	0.2451	0.07915	105.78	66.1718	93.57	43.38	3.0974	0	0	1	0
1053	2011-02-23	22.2128	0.2545	0.0826	111.25	67.4342	98.1	41.24	3.0794	1	1	1	0
1054	2011-02-24	22.8591	0.2485	0.08098	111.36	66.5822	97.28	42.45	3.0638	0	0	0	1
1055	2011-02-28	22.7482	0.2672	0.08768	111.8	66.2415	96.97	43	3.0454	1	1	0	1
1056	2011-03-02	22.6633	0.2566	0.08472	116.35	65.893	102.23	42.79	3.0313	0	0	0	0
1057	2011-03-04	22.6559	0.2598	0.08635	115.97	65.893	104.42	43.35	3.0086	1	1	1	1
1058	2011-03-07	22.7409	0.2652	0.08824	115.04	65.6141	105.44	42.95	3.0004	1	1	0	0
1059	2011-03-09	22.6818	0.2627	0.08712	115.94	65.3508	104.38	42.4	3.0145	0	0	0	0
1060	2011-03-10	22.475	0.2706	0.08917	115.43	63.0274	102.7	41.65	3.0405	1	1	0	0
1061	2011-03-15	21.5591	0.2572	0.08606	108.52	63.0351	97.18	40.69	2.983	0	0	1	0
1062	2011-03-21	22.7557	0.2786	0.09534	114.96	64.1581	102.33	43.75	2.9204	1	1	1	1
1063	2011-03-23	22.6744	0.2786	0.09589	115.55	63.9722	105.75	43.6	2.9131	1	1	0	0
1064	2011-03-28	23.0806	0.2887	0.09906	114.8	64.646	103.98	43.6	2.9183	1	1	1	1
1065	2011-03-31	23.5533	0.2874	0.09891	117.36	65.1572	106.72	45.8	2.9101	0	0	1	1
1066	2011-04-04	23.6345	0.2813	0.09691	121.06	65.7303	108.47	46.05	2.8983	0	0	1	1
1067	2011-04-08	23.8524	0.3022	0.10596	126.65	66.5668	112.79	46.5	2.8423	1	1	1	1
1068	2011-04-12	22.9994	0.2909	0.10249	120.92	64.4214	106.25	44.75	2.8386	0	0	0	0
1069	2011-04-14	23.0622	0.2859	0.10098	122.36	64.6228	108.11	45.2	2.831	0	0	1	1
1070	2011-04-15	23.3872	0.2874	0.10139	123.45	65.2811	109.66	45.95	2.8357	1	1	1	1
1071	2011-04-29	22.7409	0.2954	0.10744	125.89	68.1389	113.93	45.95	2.7531	1	1	1	1
1072	2011-05-04	22.1574	0.2864	0.10355	121.19	65.6838	109.24	44.85	2.7715	0	0	0	0
1073	2011-05-05	22.1648	0.2887	0.10229	110.8	63.9877	99.8	43.7	2.8298	1	0	0	0
1074	2011-05-06	22.3863	0.2877	0.10063	109.13	64.0419	97.18	43.77	2.8748	0	0	1	1
1075	2011-05-17	21.7659	0.285	0.09824	109.99	62.6293	96.91	41.6	2.8878	0	0	0	0
1076	2011-05-18	21.8103	0.2858	0.0988	112.3	63.6652	100.1	41.54	2.8956	1	1	1	0
1077	2011-05-19	22.2776	0.2871	0.09986	111.42	64.1248	98.44	42.14	2.8728	1	1	1	1
1078	2011-05-20	21.8616	0.2891	0.09969	112.39	63.5328	99.49	40.81	2.9044	1	0	0	0
1079	2011-05-23	21.7347	0.2803	0.09546	110.1	62.8318	97.7	39.4	2.9336	0	0	0	0
1080	2011-05-25	21.8424	0.2756	0.09396	114.93	63.8366	101.32	40	2.9369	0	0	1	1
1081	2011-06-03	21.4617	0.2787	0.09887	115.84	63.2291	100.22	41	2.8221	1	1	0	1
1082	2011-06-07	21.6002	0.2801	0.09894	116.78	62.31	99.09	41.5	2.8294	1	1	0	1
1083	2011-06-08	21.6117	0.2766	0.09678	117.85	62.9019	100.74	40.75	2.8623	0	0	1	0
1084	2011-06-15	22.0192	0.2696	0.09147	117.1	61.2663	94.81	40.54	2.9545	0	0	0	0
1085	2011-06-22	22.2922	0.2714	0.09299	114.21	62.1698	95.41	42.1	2.9368	1	1	1	1
1086	2011-06-24	21.7193	0.2717	0.09126	105.12	59.802	91.16	40.38	2.9717	1	0	0	0
1087	2011-06-27	21.8039	0.2669	0.09017	105.99	60.6899	90.61	40.05	2.9551	0	0	1	0
1088	2011-06-28	21.9154	0.2668	0.09097	108.78	62.0218	92.89	40.75	2.9306	0	1	1	1
1089	2011-06-29	22.5306	0.2668	0.09125	112.4	62.5047	94.77	42	2.9196	1	1	1	1
1090	2011-06-30	23.165	0.2675	0.09166	112.48	63.3848	95.42	43.45	2.9201	1	1	1	1
1091	2011-07-06	23.0612	0.2787	0.09487	113.62	63.5328	96.65	43	2.9395	1	1	1	0
1092	2011-07-08	22.8728	0.2794	0.09463	118.33	64.1949	96.2	42.65	2.9504	1	0	1	0
1093	2011-07-11	23.0304	0.2784	0.09196	117.24	63.7898	95.15	42.25	3.0173	0	0	0	0
1094	2011-07-12	22.8574	0.2731	0.08937	117.75	63.7821	97.43	41.79	3.0632	0	0	0	0
1095	2011-07-13	22.892	0.2724	0.09016	118.78	64.2416	98.05	41.3	3.0251	0	1	1	0
1096	2011-07-15	22.396	0.271	0.08989	117.26	64.6466	97.24	41.33	3.014	0	0	1	1
1097	2011-07-19	21.654	0.2676	0.08911	117.06	65.1373	97.5	39.74	3.0039	0	0	1	0
1098	2011-07-20	21.7463	0.2686	0.08993	118.15	64.8803	98.14	40.19	2.9828	1	1	0	1
1099	2011-07-21	22.1461	0.2686	0.09109	117.51	66.2199	99.13	41.55	2.9371	1	1	1	1
1100	2011-07-22	21.9423	0.2635	0.08922	118.67	66.3757	99.87	41	2.9543	0	0	1	0
1101	2011-07-26	22.0961	0.2662	0.0912	118.28	65.7136	99.59	41.14	2.9179	1	1	0	1
1102	2011-07-29	21.3848	0.2635	0.08945	116.74	62.1464	95.7	40.25	2.9381	0	0	0	0
1103	2011-08-01	21.1811	0.2696	0.09065	116.81	61.9984	94.89	39.01	2.9733	1	1	0	0
1104	2011-08-02	20.812	0.2661	0.08918	116.46	60.6276	93.79	38.33	2.9841	0	0	0	0
1105	2011-08-03	20.0007	0.2612	0.08845	113.23	60.5341	91.93	37.2	2.951	0	0	0	0
1106	2011-08-04	19.1472	0.2591	0.08666	107.25	57.5121	86.63	34.8	3.0024	0	0	0	0
1107	2011-08-05	18.2821	0.2416	0.08116	109.37	58.2754	86.88	33.85	2.967	0	0	1	0
1108	2011-08-08	17.6362	0.2227	0.07451	103.74	54.6692	81.31	32.18	2.9985	0	0	0	0
1109	2011-08-09	17.4631	0.2206	0.07359	102.57	55.7986	79.3	31.25	2.9627	0	0	1	0
1110	2011-08-11	18.382	0.2206	0.07295	108.02	56.12	85.72	34.14	3.0176	1	0	1	1
1111	2011-08-16	18.8396	0.2242	0.07555	109.47	57.6254	86.65	35.25	2.9676	1	1	1	1
1112	2011-08-24	19.7623	0.2153	0.07285	110.15	57.6567	85.16	37.3	2.9516	0	0	1	1
1113	2011-08-30	20.5005	0.2262	0.07733	114.02	57.9468	88.9	38.5	2.9219	1	1	1	1
1114	2011-08-31	21.1465	0.2345	0.07996	114.85	58.0331	88.81	39.4	2.9386	1	1	1	1
1115	2011-09-01	20.9811	0.2346	0.07923	114.29	57.6175	88.93	38.9	2.9703	1	0	0	0
1116	2011-09-02	20.9542	0.2276	0.07623	112.33	56.5591	86.45	38.9	2.9864	0	0	0	1
1117	2011-09-06	19.8392	0.2269	0.07482	112.89	55.7829	86.02	36.63	3.0308	0	0	0	0
1118	2011-09-07	20.1468	0.2345	0.07778	115.8	57.743	89.34	36.95	3.0087	1	1	1	1
1119	2011-09-09	19.5739	0.2311	0.07381	112.77	55.6731	87.24	34.97	3.1296	0	0	0	0
1120	2011-09-12	19.0126	0.2178	0.06919	112.25	56.3239	88.19	33.85	3.1333	0	0	1	0
1121	2011-09-13	18.9319	0.2143	0.06856	111.89	56.1749	90.21	34.04	3.1315	0	0	0	1
1122	2011-09-14	19.5778	0.2136	0.068	112.4	56.9511	88.91	35.71	3.1338	0	0	1	1
1123	2011-09-15	19.7777	0.2108	0.0684	115.34	58.0252	89.4	35.9	3.0776	0	1	1	1
1124	2011-09-16	19.7354	0.2059	0.06661	112.22	58.4486	87.96	35.9	3.0901	0	0	1	1
1125	2011-09-19	19.4548	0.2031	0.06451	109.14	57.7822	85.7	34.57	3.1357	0	0	0	0
1126	2011-09-20	19.5547	0.2052	0.06558	110.54	58.0252	86.89	34.95	3.1247	1	1	1	1
1127	2011-09-21	19.2548	0.2083	0.06668	110.36	56.4258	85.92	34.26	3.1713	1	1	0	0
1128	2011-09-22	17.6631	0.1989	0.0623	105.49	54.2854	80.51	31.05	3.2004	0	0	0	0
1129	2011-09-23	17.4554	0.1961	0.06142	103.97	54.3403	79.85	30.27	3.1853	0	0	1	0
1130	2011-09-26	17.2286	0.1954	0.0611	103.94	56.2298	80.24	30.6	3.1803	0	0	1	1
1131	2011-09-27	17.863	0.1992	0.06299	107.14	57.1628	84.45	31.35	3.1654	1	1	1	1
1132	2011-09-28	17.5977	0.1996	0.06282	103.81	56.5042	81.21	31.29	3.1955	1	0	0	0
1133	2011-09-29	17.5708	0.1996	0.06238	103.95	57.9233	82.14	31.3	3.198	1	0	1	1
1134	2011-09-30	17.317	0.1982	0.06118	102.76	56.9432	79.2	30.29	3.2544	0	0	0	0
1135	2011-10-03	16.8172	0.1947	0.05988	101.71	55.7829	77.61	28.95	3.2755	0	0	0	0
1136	2011-10-04	17.071	0.1943	0.05971	99.79	57.1001	75.67	29.69	3.2412	0	0	1	1
1137	2011-10-05	17.5247	0.1926	0.05939	102.73	57.9782	79.68	29.95	3.234	0	0	1	1
1138	2011-10-11	17.79	0.2101	0.06617	110.73	59.7971	85.81	31.95	3.1741	1	1	1	1
1139	2011-10-17	19.3163	0.215	0.06821	110.16	60.7379	86.38	34.4	3.1631	1	1	1	1
1140	2011-10-18	19.3202	0.2165	0.06825	111.15	61.8512	88.34	34.59	3.1728	1	1	1	1
1141	2011-10-21	19.6047	0.2171	0.06948	109.56	62.8234	87.4	34.85	3.1165	1	1	1	1
1142	2011-10-25	18.9895	0.2154	0.06931	110.92	62.2824	93.17	34.5	3.1094	0	0	0	0
1143	2011-10-27	20.0699	0.2269	0.07447	112.08	64.1954	93.96	37	3.0481	1	1	1	1
1144	2011-10-31	19.4355	0.2151	0.06912	109.56	61.224	93.19	35.45	3.1284	0	0	0	0
1145	2011-11-02	19.2933	0.2101	0.06644	109.34	60.6595	92.51	34.65	3.1626	0	0	0	0
1146	2011-11-03	19.3548	0.2089	0.06638	110.83	61.8277	94.07	35	3.1502	0	0	1	1
1147	2011-11-07	19.2933	0.2227	0.0703	114.56	62.2119	95.52	34.75	3.1628	1	1	1	0
1148	2011-11-08	19.474	0.2227	0.07039	115	62.9059	96.8	35.25	3.1509	1	1	1	1
1149	2011-11-09	18.7781	0.2274	0.07088	112.31	61.0367	95.74	33.25	3.2215	1	1	0	0
1150	2011-11-10	18.432	0.2229	0.06972	113.71	62.0699	97.78	33.03	3.1986	0	0	1	0
1151	2011-11-11	18.5628	0.2276	0.07201	114.16	62.8743	98.99	32.85	3.1585	1	1	1	0
1152	2011-11-15	18.3744	0.2227	0.06929	112.39	62.3775	99.37	32.55	3.218	0	0	0	0
1153	2011-11-16	17.9783	0.2245	0.06951	111.88	61.715	102.59	31.14	3.2433	1	1	0	0
1154	2011-11-21	16.9172	0.2101	0.065	106.88	60.6581	96.92	30	3.2349	0	0	0	0
1155	2011-11-23	16.6019	0.2024	0.06207	107.02	58.8205	96.17	29.2	3.2651	0	0	0	0
1156	2011-11-25	16.8595	0.1926	0.05846	106.4	58.2842	96.77	28.7	3.2976	0	0	0	0
1157	2011-11-28	17.4785	0.194	0.05925	109	59.8142	98.21	30	3.2731	1	1	1	1
1158	2011-11-29	17.6746	0.194	0.05919	110.82	60.6739	99.79	30.26	3.2697	1	0	1	1
1159	2011-11-30	18.9165	0.2031	0.06265	110.52	63.4422	100.36	32.42	3.2435	1	1	1	1
1160	2011-12-02	18.2282	0.2094	0.06433	109.94	62.9296	100.96	31.7	3.2508	1	1	0	0
1161	2011-12-05	18.0399	0.2101	0.06496	109.81	63.4501	100.99	31.5	3.2459	1	1	1	0
1162	2011-12-07	18.186	0.2039	0.06298	109.53	63.947	100.49	32.1	3.24	0	0	1	1
1163	2011-12-09	18.8972	0.2045	0.06292	108.62	64.152	99.41	32.77	3.2475	1	0	1	1
1164	2011-12-12	18.3013	0.2045	0.06205	107.26	63.1346	97.77	31.1	3.2991	1	0	0	0
1165	2011-12-13	18.5858	0.2031	0.06108	109.5	63.5132	100.14	32.05	3.3362	0	0	1	1
1166	2011-12-14	17.9745	0.2031	0.06069	105.02	62.6535	94.95	30.26	3.3481	1	0	0	0
1167	2011-12-15	18.1514	0.2031	0.06084	105.09	63.1189	93.87	30.7	3.3357	1	1	1	1
1168	2011-12-16	17.8938	0.2017	0.06056	103.35	63.2214	93.53	30.11	3.3236	0	0	1	0
1169	2011-12-19	17.8591	0.2038	0.06153	103.64	62.7245	93.88	29.36	3.3163	1	1	0	0
1170	2011-12-20	18.0014	0.1969	0.05975	106.73	64.6726	97.22	30.61	3.2957	0	0	1	1
1171	2011-12-23	18.2782	0.2031	0.06174	107.96	67.2122	99.68	30.98	3.2892	1	1	1	1
1172	2011-12-27	18.2398	0.202	0.06153	109.27	67.2595	101.34	31.19	3.2853	0	0	1	1
1173	2011-12-29	18.0245	0.2031	0.06098	108.01	67.2516	99.65	30.38	3.3167	1	0	0	0
1174	2012-01-05	18.4051	0.2031	0.05978	112.74	67.6381	101.81	30.85	3.4005	1	0	1	1
1175	2012-01-18	18.7165	0.2077	0.06141	110.66	68.1823	100.59	31	3.3828	1	1	1	1
1176	2012-01-19	18.7089	0.2122	0.06314	111.55	68.6397	100.39	31.45	3.3529	1	1	1	1
1177	2012-01-20	18.6858	0.2122	0.0631	109.86	69.0025	98.46	31.79	3.3602	1	0	1	1
1178	2012-01-26	20.1276	0.228	0.0691	110.79	68.4346	99.7	34.49	3.3131	1	1	0	1
1179	2012-01-27	19.8277	0.2313	0.07017	111.46	67.6933	99.56	34.2	3.2852	1	1	0	0
1180	2012-02-03	20.7966	0.2434	0.07369	114.58	66.9756	97.84	35.55	3.3001	1	1	0	1
1181	2012-02-07	20.9465	0.2416	0.07355	116.23	68.0955	98.41	35.5	3.2824	0	0	1	0
1182	2012-02-08	20.7466	0.2514	0.07664	117.2	67.6593	98.71	35.6	3.2838	1	1	0	1
1183	2012-02-09	21.0926	0.257	0.07852	118.59	67.3104	99.84	36.21	3.2746	1	1	0	1
1184	2012-02-10	20.4813	0.2563	0.07778	117.31	66.454	98.67	35.45	3.3002	0	0	0	0
1185	2012-02-22	22.1307	0.2871	0.08724	122.9	68.9281	106.28	38.3	3.2915	1	1	1	1
1186	2012-02-23	22.0346	0.2882	0.0881	123.62	69.0074	107.83	38.15	3.2588	1	1	1	0
1187	2012-02-24	22.1846	0.2906	0.08986	125.47	69.2612	109.77	39.05	3.2346	1	1	1	1
1188	2012-02-28	21.5117	0.2871	0.08882	121.55	69.1026	106.55	38.04	3.23	0	0	0	0
1189	2012-02-29	21.4771	0.2906	0.08925	122.66	68.5951	107.07	37.38	3.2624	1	1	0	0
1190	2012-03-05	21.8654	0.2976	0.09049	123.8	68.9995	106.72	37.27	3.2916	1	1	1	0
1191	2012-03-06	20.9465	0.2906	0.0875	121.98	68.0875	104.7	36	3.322	0	0	0	0
1192	2012-03-07	20.762	0.281	0.08478	124.12	68.0638	106.16	35.75	3.3128	0	0	0	0
1193	2012-03-15	21.6655	0.2746	0.08204	123.55	68.27	105.11	36.75	3.3498	0	0	1	1
1194	2012-03-16	21.8385	0.2762	0.08299	125.81	68.5475	107.06	37.12	3.3264	1	1	1	1
1195	2012-03-19	21.777	0.2731	0.08259	125.71	68.9836	108.09	37.35	3.3071	0	0	1	1
1196	2012-04-02	20.5236	0.292	0.0889	125.43	69.0471	105.23	35.59	3.2896	1	1	1	0
1197	2012-04-03	20.5697	0.2871	0.08745	124.86	68.0638	104.01	35.41	3.3071	0	0	0	0
1198	2012-04-05	19.5855	0.2801	0.08367	123.43	67.2628	103.31	33.55	3.3474	0	0	0	0
1199	2012-04-12	19.3894	0.2742	0.08258	121.71	66.2953	103.64	33.6	3.3161	0	0	0	1
1200	2012-04-13	19.1856	0.278	0.08312	121.83	65.7799	102.83	32.85	3.3462	1	1	0	0
1201	2012-04-19	18.4705	0.278	0.08343	118	67.6276	102.27	31.28	3.3326	1	1	1	0
1202	2012-04-23	18.532	0.2759	0.08269	118.71	67.9528	103.11	31.05	3.3329	0	0	1	0
1203	2012-05-03	19.4586	0.2892	0.08625	116.08	67.921	102.54	34	3.3481	1	1	0	1
1204	2012-05-09	18.4551	0.274	0.08023	113.2	66.0654	96.81	31	3.4177	0	0	0	0
1205	2012-05-10	18.5089	0.2749	0.08066	112.73	66.1452	97.08	29.63	3.416	1	1	1	0
1206	2012-05-11	18.7319	0.2753	0.08032	112.26	66.3528	96.13	31.75	3.4341	1	0	1	1
1207	2012-05-14	18.0937	0.2591	0.07486	111.57	65.5703	94.78	29.29	3.4645	0	0	0	0
1208	2012-05-15	18.013	0.2675	0.07687	112.24	65.3068	93.98	28.42	3.4919	1	1	0	0
1209	2012-05-16	17.8557	0.2622	0.07532	111.71	65.6102	92.81	28.25	3.4853	0	0	1	0
1210	2012-05-18	17.8315	0.2599	0.07447	107.14	65.0513	91.48	28.35	3.4774	0	0	0	1
1211	2012-05-21	18.3518	0.2571	0.07392	108.81	65.5065	92.57	28.9	3.4688	0	0	1	1
1212	2012-05-23	18.1542	0.2645	0.0744	105.56	65.5065	89.9	28.2	3.5454	1	1	1	0
1213	2012-05-24	18.3236	0.2675	0.07511	106.55	65.9616	90.66	28.2	3.5638	1	1	1	1
1214	2012-05-25	18.2953	0.2691	0.07516	106.83	65.5384	90.86	28.25	3.5773	1	1	0	1
1215	2012-05-29	18.259	0.2691	0.07523	106.68	65.4186	90.76	27.95	3.572	1	1	0	0
1216	2012-05-30	17.6621	0.2702	0.07491	103.47	63.7099	87.82	27.25	3.6209	1	0	0	0
1217	2012-05-31	17.771	0.2661	0.07342	101.87	62.7837	86.53	26.8	3.6282	0	0	0	0
1218	2012-06-01	17.2144	0.2568	0.07122	98.43	62.2168	83.23	26.45	3.5897	0	0	0	0
1219	2012-06-08	17.6702	0.2675	0.07486	99.47	64.5483	84.1	27.58	3.5666	1	1	1	1
1220	2012-06-12	17.8154	0.276	0.07725	97.14	64.8836	83.32	27.71	3.5611	1	1	1	1
1221	2012-06-14	17.8557	0.2813	0.07948	97.03	65.5783	83.91	27.9	3.5312	1	1	1	1
1222	2012-06-19	18.9851	0.2866	0.08157	95.76	67.4547	84.03	29.65	3.518	1	1	1	1
1223	2012-06-20	19.0335	0.2892	0.08227	92.69	67.846	81.8	30.14	3.512	1	1	1	1
1224	2012-06-25	18.1017	0.2828	0.0791	91.01	64.8677	79.21	28.26	3.5731	0	0	0	0
1225	2012-06-26	17.9646	0.2828	0.07931	93.02	65.7939	79.36	27.71	3.5668	1	1	1	0
1226	2012-07-02	19.9329	0.2924	0.0827	97.34	68.1414	83.75	30.85	3.5355	1	1	1	1
1227	2012-07-05	20.1668	0.2828	0.07803	100.7	68.3251	87.22	30.8	3.6252	0	0	1	0
1228	2012-07-06	19.6869	0.2832	0.07672	98.19	67.7102	84.45	30.26	3.691	1	0	0	0
1229	2012-07-09	19.7756	0.287	0.07786	100.32	66.792	85.99	30.15	3.6801	1	1	0	0
1230	2012-07-11	19.5618	0.2882	0.07807	100.23	67.3749	85.81	29.75	3.6953	1	1	1	0
1231	2012-07-12	19.0698	0.286	0.07684	101.07	67.1673	86.08	29.15	3.7224	0	0	0	0
1232	2012-07-19	19.5901	0.2943	0.07894	107.8	68.8361	92.66	29.9	3.7273	1	1	1	1
1233	2012-07-23	18.7955	0.2828	0.07404	103.26	68.0376	88.14	28.17	3.8294	0	0	0	0
1234	2012-07-24	19.1101	0.2805	0.07317	103.42	67.5346	88.5	28.25	3.8369	0	0	0	1
1235	2012-07-25	19.4408	0.2866	0.0752	104.38	68.0616	88.97	29.46	3.8048	1	1	1	1
1236	2012-07-26	20.0055	0.2889	0.07692	105.26	69.0836	89.39	30.55	3.7578	1	1	1	1
1237	2012-07-27	20.0741	0.2889	0.0776	106.47	69.8262	90.13	30.95	3.7336	1	1	1	1
1238	2012-07-31	20.6347	0.2964	0.07954	104.92	69.3471	88.06	31.2	3.7266	1	1	0	1
1239	2012-08-02	20.4895	0.2936	0.07726	105.9	68.5726	87.13	31.2	3.7927	0	0	0	1
1240	2012-08-06	21.1308	0.2985	0.08099	109.55	69.8262	92.2	32.68	3.685	1	1	1	1
1241	2012-08-07	21.4978	0.2951	0.0806	112	70.2015	93.67	33.3	3.6652	0	0	1	1
1242	2012-08-09	21.2558	0.2916	0.07878	113.22	70.8827	93.36	32.45	3.6928	0	0	1	0
1243	2012-08-10	21.2034	0.2905	0.07873	112.95	71.0756	92.87	32.35	3.691	0	0	1	0
1244	2012-08-13	21.2155	0.2905	0.07896	113.6	70.8345	92.73	32.6	3.6796	1	1	0	1
1245	2012-08-14	21.2397	0.2897	0.07954	114.03	70.8827	93.43	32.43	3.6439	0	1	1	0
1246	2012-08-16	21.4172	0.2889	0.07965	116.9	71.2604	95.6	32.82	3.6288	0	1	1	1
1247	2012-08-17	21.6068	0.289	0.07936	113.71	71.0434	96.01	32.83	3.6391	1	0	0	1
1248	2012-08-20	21.635	0.2928	0.08035	113.7	70.6818	95.97	33.2	3.642	1	1	0	1
1249	2012-08-21	21.3365	0.2951	0.0822	114.64	70.288	96.68	33.35	3.5912	1	1	0	1
1250	2012-08-22	21.2841	0.2958	0.08209	114.91	70.505	97.26	33.1	3.5866	1	0	1	0
1251	2012-08-23	21.0945	0.2981	0.08359	115.01	70.1674	96.27	33.05	3.5692	1	1	0	0
1252	2012-08-27	21.151	0.2952	0.08266	112.26	70.513	95.47	33.04	3.5747	0	0	1	0
1253	2012-08-28	21.0945	0.2951	0.08331	112.58	70.8023	96.33	33.15	3.5431	0	1	1	1
1254	2012-08-29	21.3365	0.2948	0.08264	112.54	70.6416	95.49	33.51	3.5683	0	0	0	1
1255	2012-08-31	21.276	0.2943	0.08272	114.57	70.1594	96.47	33.05	3.556	0	1	0	0
1256	2012-09-05	20.6549	0.294	0.0826	113.09	70.1835	95.36	31.96	3.5608	0	0	1	0
1257	2012-09-10	21.2075	0.3119	0.08911	114.81	71.9114	96.54	33.9	3.5063	1	1	1	1
1258	2012-09-11	21.3446	0.3126	0.0896	115.4	72.0239	97.17	34.25	3.4901	1	1	1	1
1259	2012-09-13	21.6632	0.3134	0.08967	116.9	73.3178	98.31	35.21	3.4654	1	1	1	1
1260	2012-09-17	22.5465	0.3142	0.09172	113.79	73.8643	96.62	36.6	3.4272	1	1	1	1
1261	2012-09-18	22.3207	0.3123	0.09038	112.03	73.6553	95.29	36.45	3.4536	0	0	0	0
1262	2012-09-19	22.3852	0.3115	0.09042	108.19	72.7874	91.98	36.6	3.4513	0	1	0	1
1263	2012-09-21	22.6554	0.3122	0.08987	111.42	73.8723	92.89	36.65	3.4798	1	0	1	1
1264	2012-09-24	22.4739	0.3029	0.08663	109.81	73.8402	91.93	36	3.4923	0	0	0	0
1265	2012-09-25	22.724	0.3059	0.08783	110.45	73.7277	91.37	36.2	3.4952	1	1	0	1
1266	2012-09-27	22.1311	0.3004	0.08573	112.01	73.7759	91.85	35.7	3.5003	0	0	1	0
1267	2012-09-28	21.9698	0.3005	0.08525	112.39	73.4946	92.19	35.27	3.5306	1	0	0	0
1268	2012-10-01	22.1956	0.3058	0.08717	112.19	73.7759	92.48	35.49	3.5083	1	1	1	1
1269	2012-10-02	22.361	0.3087	0.08825	111.57	73.7116	91.89	36.05	3.5044	1	1	0	1
1270	2012-10-03	22.1996	0.3058	0.08703	108.17	73.6955	88.14	35.9	3.5148	0	0	0	0
1271	2012-10-05	22.3529	0.308	0.08798	112.02	74.3786	89.88	36.2	3.5063	1	1	1	1
1272	2012-10-08	22.2642	0.3058	0.0868	111.82	74.4831	89.33	35.6	3.5242	0	0	1	0
1273	2012-10-09	22.24	0.3027	0.08517	114.5	74.0411	92.39	35.55	3.5505	0	0	0	0
1274	2012-10-11	22.845	0.308	0.08726	115.71	73.2696	92.07	36.89	3.5343	1	1	0	1
1275	2012-10-12	22.6151	0.3077	0.08722	114.62	73.1571	91.86	36.5	3.5238	0	0	0	0
1276	2012-10-16	23.2524	0.3172	0.09043	115.07	74.242	92.09	37.65	3.5055	1	1	1	1
1277	2012-10-18	23.2685	0.3172	0.09079	112.42	75.126	92.1	38.4	3.503	1	1	1	1
1278	2012-10-19	22.845	0.3165	0.08999	110.14	74.0571	90.05	36.94	3.5156	0	0	0	0
1279	2012-10-22	22.5506	0.3134	0.08944	109.44	74.0893	88.73	36.9	3.5036	0	0	1	0
1280	2012-10-23	22.3529	0.3134	0.08886	108.25	72.4739	86.67	36.1	3.5238	1	0	0	0
1281	2012-10-25	22.0222	0.3138	0.08913	108.49	72.6749	86.05	35.55	3.5277	1	1	1	0
1282	2012-10-31	22.7482	0.3129	0.08929	108.7	73.2696	86.24	37.4	3.5076	0	1	1	1
1283	2012-11-02	23.3129	0.3172	0.08984	105.68	72.5463	84.86	37.05	3.5278	1	1	0	0
1284	2012-11-05	23.0063	0.318	0.08982	107.73	72.8356	85.65	36.46	3.536	1	0	1	0
1285	2012-11-06	22.8248	0.3195	0.0907	111.07	73.6232	88.71	36.7	3.523	1	1	1	1
1286	2012-11-07	22.1513	0.3138	0.08864	106.82	71.3103	84.44	35.3	3.5366	0	0	0	0
1287	2012-11-08	21.8608	0.308	0.08677	107.25	70.4127	85.09	34.7	3.5477	0	0	0	0
1288	2012-11-09	22.1029	0.3061	0.08605	109.4	70.5259	86.07	34.75	3.5591	0	0	1	1
1289	2012-11-12	21.885	0.3019	0.08475	109.07	70.6149	85.57	34.75	3.5636	0	0	1	1
1290	2012-11-13	21.7479	0.2996	0.08391	108.26	69.9275	85.38	34.49	3.5716	0	0	0	0
1291	2012-11-14	21.7479	0.3019	0.08466	109.61	69.604	86.32	34.2	3.5691	1	1	0	0
1292	2012-11-20	22.1472	0.3125	0.08828	109.83	70.7604	86.75	35.44	3.5383	1	1	1	1
1293	2012-11-21	22.0222	0.3111	0.08804	110.86	71.1728	87.38	35.2	3.533	0	0	1	0
1294	2012-11-23	21.9738	0.3073	0.08797	111.38	72.0462	88.28	35.5	3.4945	0	0	1	1
1295	2012-11-26	21.9012	0.3061	0.08782	110.92	71.6662	87.74	35.4	3.4824	0	0	0	0
1296	2012-11-27	21.9012	0.3019	0.08664	109.87	70.6391	87.18	34.92	3.4825	0	0	0	0
1297	2012-11-28	21.9214	0.2981	0.08545	109.51	71.2456	86.49	35.2	3.4826	0	0	1	1
1298	2012-11-29	22.0746	0.3041	0.08741	110.76	71.2618	88.07	35.6	3.479	1	1	1	1
1299	2012-12-03	22.0222	0.3032	0.08749	110.92	70.8494	89.09	35.69	3.4665	0	1	0	1
1300	2012-12-04	22.0867	0.3	0.08664	109.84	70.5097	88.5	35.7	3.4627	0	0	0	1
1301	2012-12-05	22.1351	0.3008	0.08673	108.81	70.9464	87.88	35.78	3.472	1	1	1	1
1302	2012-12-06	22.1755	0.3042	0.08687	107.03	71.1648	86.26	35.82	3.4976	1	1	1	1
1303	2012-12-10	22.244	0.3027	0.0864	107.33	71.4963	85.56	35.53	3.5037	0	0	1	0
1304	2012-12-11	22.6433	0.3035	0.08685	108.01	71.9654	85.79	36.55	3.4936	1	1	1	1
1305	2012-12-13	22.7643	0.3054	0.08913	107.91	71.6338	85.89	36.86	3.4244	1	1	0	1
1306	2012-12-14	22.3005	0.3058	0.09006	109.15	71.2294	86.73	36.62	3.3977	1	1	0	0
1307	2012-12-18	22.3449	0.3051	0.09037	108.84	72.4263	87.93	36.85	3.3749	0	1	1	1
1308	2012-12-19	22.4941	0.3093	0.09161	110.36	71.5206	89.51	36.76	3.3784	1	1	0	0
1309	2012-12-20	22.3408	0.313	0.09304	110.2	71.8845	90.13	36.89	3.3632	1	1	1	1
1310	2012-12-21	22.1472	0.3202	0.09482	108.97	70.5421	88.66	36.25	3.3772	1	1	0	0
1311	2012-12-27	22.2037	0.3307	0.09865	110.8	70.2428	90.87	36.59	3.347	1	1	0	1
1312	2012-12-28	22.0665	0.3273	0.09743	110.62	68.8196	90.8	36.38	3.3607	0	0	0	0
1313	2013-01-03	22.7805	0.3363	0.0999	112.14	71.6096	92.92	36.84	3.3842	1	1	1	1
1314	2013-01-04	22.9176	0.3386	0.0999	111.31	71.9411	93.09	37.25	3.383	1	1	1	1
1315	2013-01-07	23.204	0.3326	0.09898	111.4	71.1082	93.19	37.65	3.358	0	0	0	1
1316	2013-01-08	23.3935	0.3394	0.10068	111.94	71.5529	93.15	37.9	3.3673	1	1	1	1
1317	2013-01-10	23.2645	0.3393	0.10298	111.89	72.0543	93.82	38.4	3.2904	0	1	1	1
1318	2013-01-14	22.9458	0.357	0.10877	111.88	72.4425	94.14	38.24	3.2765	1	1	1	0
1319	2013-01-15	23.3411	0.3593	0.11042	110.3	72.4021	93.28	38.69	3.263	1	1	0	1
1320	2013-01-16	23.5226	0.3593	0.11038	110.61	72.3535	94.24	38.68	3.2524	1	0	0	0
1321	2013-01-17	23.9501	0.3554	0.10985	111.1	72.9439	95.49	39.56	3.234	0	0	1	1
1322	2013-01-18	24.1195	0.3531	0.10827	111.89	73.4291	95.56	40	3.2607	0	0	1	1
1323	2013-01-22	24.3817	0.3455	0.10546	112.42	73.5261	96.24	40.4	3.2696	0	0	1	1
1324	2013-01-23	24.4382	0.3516	0.10711	112.8	73.3482	95.23	40.32	3.2821	1	1	0	0
1325	2013-01-24	24.5592	0.347	0.10644	113.28	73.8739	95.95	40.65	3.2584	0	0	1	1
1326	2013-01-25	24.7528	0.3516	0.10819	113.28	74.1812	95.88	41.42	3.2476	1	1	1	1
1327	2013-01-28	24.6519	0.3505	0.10733	113.48	73.6798	96.44	41.08	3.2661	0	0	0	0
1328	2013-01-29	24.9222	0.3455	0.10644	114.36	74.2054	97.57	41.75	3.2437	0	0	1	1
1329	2013-01-30	24.8455	0.3417	0.10578	114.9	73.3239	97.94	41.94	3.2327	0	0	0	1
1330	2013-02-01	24.3293	0.343	0.10729	116.76	72.8145	97.77	41.52	3.2009	1	1	0	0
1331	2013-02-04	23.7323	0.3409	0.10553	115.6	72.0947	96.17	39.89	3.2357	0	0	0	0
1332	2013-02-06	24.2204	0.3386	0.10429	116.73	72.6123	96.62	40.46	3.2441	0	0	1	1
1333	2013-02-07	24.3494	0.3363	0.10253	117.24	71.8229	95.83	40.51	3.2837	0	0	0	1
1334	2013-02-08	24.6923	0.3348	0.1017	118.9	72.1159	95.72	41.1	3.29	0	0	1	1
1335	2013-02-12	24.5632	0.3274	0.10012	118.66	71.9938	97.51	41.19	3.273	0	0	0	1
1336	2013-02-13	24.7286	0.3327	0.10207	118.72	72.1647	97.01	41.43	3.2572	1	1	1	1
1337	2013-02-14	24.3857	0.3279	0.0998	118	72.0426	97.31	40.49	3.2784	0	0	0	0
1338	2013-02-15	24.1397	0.328	0.09989	117.66	71.9124	95.86	40.08	3.2821	1	1	0	0
1339	2013-02-19	24.2365	0.3317	0.10147	117.52	72.6937	96.66	40.22	3.2681	1	1	1	1
1340	2013-02-20	24.9666	0.3418	0.10425	115.6	72.4088	94.46	41.14	3.2957	1	1	0	1
1341	2013-02-21	25.0069	0.3386	0.10196	113.53	72.0996	92.84	40.63	3.3236	0	0	0	0
1342	2013-02-22	26.2088	0.3456	0.10397	114.1	72.596	93.13	42.94	3.3263	1	1	1	1
1343	2013-02-25	26.8219	0.3424	0.10325	114.44	71.3753	93.11	42.5	3.3529	0	0	0	0
1344	2013-02-28	26.8945	0.3424	0.10283	111.38	72.8809	92.05	43.73	3.337	1	0	1	1
1345	2013-03-01	26.8421	0.3379	0.10105	110.4	72.7832	90.68	43.39	3.3494	0	0	0	0
1346	2013-03-04	27.4269	0.3389	0.10101	110.09	72.3925	90.12	44.58	3.3518	1	0	0	1
1347	2013-03-05	28.0319	0.3441	0.10294	111.61	72.9297	90.82	45.48	3.3373	1	1	1	1
1348	2013-03-06	28.411	0.344	0.10251	111.06	72.889	90.43	45.9	3.3619	0	0	0	1
1349	2013-03-07	28.5441	0.3447	0.10367	111.15	72.1972	91.56	46.18	3.3218	1	1	0	1
1350	2013-03-08	28.2981	0.3455	0.10307	110.85	72.4088	91.95	45.79	3.3504	1	0	1	0
1351	2013-03-11	27.7697	0.3446	0.10275	110.22	72.5635	92.06	45	3.3514	0	0	1	0
1352	2013-03-12	27.7496	0.35	0.1041	109.65	72.5635	92.54	44.51	3.358	1	1	1	0
1353	2013-03-15	27.7576	0.3596	0.10694	109.82	72.7344	93.45	45.16	3.3584	1	1	1	1
1354	2013-03-18	27.3543	0.3531	0.10378	109.51	72.2461	93.74	43.88	3.4051	0	0	0	0
1355	2013-03-20	27.9109	0.3596	0.10523	108.72	72.1321	92.96	44.59	3.4188	1	1	0	1
1356	2013-03-21	27.4632	0.3531	0.10313	107.47	71.7578	92.45	44	3.4282	0	0	0	0
1357	2013-03-22	27.6084	0.3474	0.1018	107.66	72.6693	93.71	44.5	3.4088	0	0	1	1
1358	2013-03-25	27.3261	0.3516	0.10254	108.17	72.4495	94.81	43.88	3.436	1	1	0	0
1359	2013-03-26	27.0357	0.357	0.10398	109.36	73.3529	96.34	43.12	3.4276	1	1	1	0
1360	2013-03-27	27.1688	0.3531	0.1022	109.69	73.7191	96.58	42.94	3.4537	0	0	1	0
1361	2013-03-28	26.7614	0.3501	0.10165	110.02	73.3366	97.23	42.91	3.4456	0	0	0	0
1362	2013-04-02	27.4269	0.3554	0.10313	110.69	73.7191	97.19	43.4	3.4493	1	1	1	1
1363	2013-04-03	27.4672	0.357	0.1036	107.11	73.1902	94.45	44	3.4446	1	1	0	1
1364	2013-04-04	27.6568	0.3566	0.1039	106.34	73.0599	93.26	44.6	3.4165	0	1	0	1
1365	2013-04-05	27.4753	0.353	0.10402	104.12	72.4414	92.7	44.57	3.3973	0	1	0	0
1366	2013-04-08	27.9916	0.3493	0.10317	104.66	72.1077	93.36	45.35	3.3853	0	0	0	1
1367	2013-04-09	28.3868	0.352	0.1047	106.23	72.2461	94.2	46.2	3.3588	1	1	1	1
1368	2013-04-10	29.1209	0.3554	0.10578	105.79	72.1728	94.64	47.3	3.357	1	1	0	1
1369	2013-04-11	29.6291	0.3552	0.10614	104.27	72.6123	93.51	48.23	3.3515	0	1	1	1
1370	2013-04-12	29.2822	0.3554	0.10616	103.11	72.4251	91.29	47.85	3.3414	1	1	0	0
1371	2013-04-15	28.044	0.3505	0.10461	100.39	70.3905	88.71	45.21	3.3624	0	0	0	0
1372	2013-04-16	27.9069	0.3524	0.10619	99.91	70.4882	88.72	45.88	3.3174	1	1	1	1
1373	2013-04-18	27.4229	0.3478	0.10391	99.13	70.4963	87.73	44.43	3.3542	0	0	1	0
1374	2013-04-19	27.4672	0.3447	0.10316	99.65	71.1718	88.01	44.62	3.3441	0	0	1	1
1375	2013-04-23	27.8343	0.3365	0.10064	100.31	72.6774	89.18	45.03	3.346	0	0	1	1
1376	2013-04-24	28.6853	0.344	0.10262	101.73	72.7832	91.43	46.35	3.3481	1	1	1	1
1377	2013-04-25	29.0443	0.3424	0.10253	103.41	71.6764	93.64	47.06	3.3385	0	0	0	1
1378	2013-04-26	28.0763	0.344	0.10311	103.16	71.6194	93	45.55	3.3323	1	1	0	0
1379	2013-04-29	28.4272	0.3553	0.10773	103.81	71.7903	94.5	46.5	3.2961	1	1	1	1
1380	2013-04-30	28.7781	0.3539	0.10754	102.37	72.4251	93.46	46.83	3.2867	0	0	1	1
1381	2013-05-02	29.2822	0.3516	0.10658	102.85	72.1321	93.99	47.81	3.3026	0	0	0	1
1382	2013-05-08	29.5041	0.3463	0.10551	104.34	74.6307	96.62	48.47	3.2843	0	0	1	1
1383	2013-05-10	29.6049	0.3525	0.10569	103.91	73.8685	96.04	47.95	3.3312	1	1	0	0
1384	2013-05-13	29.4436	0.3699	0.11095	102.82	73.8358	95.17	47.7	3.3335	1	1	0	0
1385	2013-05-14	31.5934	0.3619	0.1082	102.6	74.6635	94.21	50.85	3.3525	0	0	1	1
1386	2013-05-15	31.0569	0.3503	0.10395	103.68	74.77	94.3	49.99	3.3691	0	0	1	0
1387	2013-05-16	31.186	0.3381	0.10053	103.8	74.3275	95.16	50.06	3.3674	0	0	0	1
1388	2013-05-17	31.3473	0.3345	0.09887	104.64	75.1961	96.02	49.9	3.3804	0	0	1	0
1389	2013-05-21	32.0169	0.334	0.09915	103.91	76.0484	96.16	51.45	3.3695	0	1	1	1
1390	2013-05-22	31.4554	0.3419	0.10119	102.6	75.5485	94.28	49.15	3.3811	1	1	0	0
1391	2013-05-23	31.5386	0.3445	0.10232	102.44	75.2207	94.25	48.93	3.3673	1	1	0	0
1392	2013-05-24	31.1767	0.3471	0.10318	102.64	75.0076	94.15	48.83	3.3665	1	1	0	0
1393	2013-05-28	31.0936	0.3487	0.10356	104.23	75.7042	95.01	47.87	3.3704	1	1	1	0
1394	2013-05-29	30.8523	0.3437	0.1022	102.43	75.4584	93.13	48.25	3.3631	0	0	0	1
1395	2013-05-31	29.7377	0.3373	0.09963	100.39	74.139	91.97	47.15	3.379	0	0	0	0
1396	2013-06-03	30.1328	0.3422	0.10144	102.06	74.9503	93.45	47.6	3.3746	1	1	1	1
1397	2013-06-04	30.1078	0.3455	0.10255	103.24	74.4012	93.31	47.35	3.3622	1	1	0	0
1398	2013-06-05	29.9789	0.3422	0.10039	103.04	73.467	93.74	47.23	3.4086	0	0	0	0
1399	2013-06-06	29.4465	0.3396	0.09918	103.61	73.9423	94.76	47.1	3.4239	0	0	1	0
1400	2013-06-07	29.8541	0.3417	0.10017	104.56	74.9421	96.03	47.65	3.4112	1	1	1	1
1401	2013-06-10	30.2617	0.3503	0.10245	103.95	74.6716	95.77	48.34	3.4109	1	1	0	1
1402	2013-06-11	29.6129	0.3502	0.10299	102.96	74.1308	95.38	47.4	3.3924	0	1	0	0
1403	2013-06-12	29.4632	0.3503	0.10409	103.49	73.5408	95.88	47.37	3.3667	1	1	0	0
1404	2013-06-13	29.8167	0.3459	0.10307	104.25	74.8438	96.69	47.9	3.3432	0	0	1	1
1405	2013-06-14	30.2867	0.3453	0.10324	105.93	74.2291	97.85	48.59	3.3371	0	1	0	1
1406	2013-06-18	30.6444	0.3479	0.10379	106.02	75.3354	98.44	49.52	3.3524	1	1	1	1
1407	2013-06-19	30.7775	0.3502	0.10415	106.12	74.5733	98.24	49.01	3.4059	1	1	0	0
1408	2013-06-21	29.093	0.3438	0.09957	100.91	73.3277	93.69	46.7	3.4646	0	0	0	0
1409	2013-06-25	28.569	0.3402	0.09939	101.26	73.0245	95.32	45.23	3.4284	0	0	0	0
1410	2013-06-26	29.1762	0.3343	0.09769	101.66	73.5899	95.5	45.91	3.4152	0	0	1	1
1411	2013-06-27	28.9059	0.3411	0.09979	102.82	73.7866	97.05	45.52	3.419	1	1	1	0
1412	2013-06-28	28.8643	0.3432	0.09997	102.16	74.0406	96.56	45.14	3.4294	1	1	1	0
1413	2013-07-01	30.1952	0.343	0.10063	103	73.9997	97.99	47.28	3.4051	0	1	0	1
1414	2013-07-02	30.0663	0.3385	0.09931	104	74.2783	99.6	46.81	3.42	0	0	1	0
1415	2013-07-03	29.5838	0.3381	0.09911	105.76	74.3193	101.24	46.54	3.4135	0	0	1	0
1416	2013-07-05	29.6129	0.3389	0.09773	107.72	75.0404	103.22	45.55	3.4677	1	0	1	0
1417	2013-07-09	28.6189	0.3429	0.09877	107.81	76.4909	103.53	44.3	3.475	1	1	1	0
1418	2013-07-10	27.3587	0.3438	0.0997	108.51	76.0648	106.52	42.32	3.4162	1	1	0	0
1419	2013-07-11	28.752	0.3472	0.10229	107.73	76.4335	104.91	45.23	3.375	1	1	1	1
1420	2013-07-12	29.0889	0.3479	0.10276	108.81	76.5401	105.95	46.05	3.3898	1	1	1	1
1421	2013-07-15	28.5399	0.3495	0.10301	109.09	76.4172	106.32	45.19	3.3872	1	1	0	0
1422	2013-07-16	27.9659	0.3486	0.10331	109.4	76.4581	106	44.25	3.3672	0	1	1	0
1423	2013-07-17	28.1614	0.3464	0.10261	108.61	76.5893	106.48	44.5	3.3805	0	0	1	1
1424	2013-07-18	28.3693	0.3494	0.10328	108.7	77.3432	108.04	44.8	3.3819	1	1	1	1
1425	2013-07-19	28.4234	0.3497	0.10386	108.07	77.9906	108.05	45.1	3.3662	1	1	1	1
1426	2013-07-22	28.3111	0.3468	0.10358	108.15	77.7119	106.91	44.69	3.3513	0	0	0	0
1427	2013-07-23	28.2238	0.3503	0.10518	108.42	78.0152	107.23	44.69	3.33	1	1	1	1
1428	2013-07-24	27.525	0.3464	0.10417	107.19	77.8431	105.39	43.76	3.3268	0	0	0	0
1429	2013-07-25	27.8286	0.3455	0.10395	107.65	77.8267	105.49	44.4	3.311	0	0	0	1
1430	2013-07-26	27.4793	0.3456	0.10452	107.17	77.6792	104.7	44.22	3.306	1	1	0	0
1431	2013-07-29	27.9908	0.345	0.10418	107.45	77.0563	104.55	44.9	3.3135	0	0	0	1
1432	2013-07-30	27.6248	0.3455	0.10421	106.91	76.8761	103.08	44.16	3.313	1	1	0	0
1433	2013-07-31	27.6706	0.3455	0.10387	107.7	76.8269	105.03	44.7	3.3196	1	0	0	1
1434	2013-08-01	28.9516	0.352	0.10543	109.54	75.991	107.89	46	3.3441	1	1	0	1
1435	2013-08-02	28.9682	0.3512	0.10541	108.95	75.3518	106.94	46.55	3.3306	0	0	0	1
1436	2013-08-05	28.7145	0.3512	0.10553	108.7	75.0568	106.56	45.87	3.3273	1	1	0	0
1437	2013-08-07	28.1406	0.3661	0.10977	107.44	74.8519	104.37	45.55	3.335	1	1	0	0
1438	2013-08-08	28.0241	0.365	0.11003	106.68	75.2125	103.4	45.4	3.3194	0	1	1	0
1439	2013-08-09	28.5731	0.3601	0.10856	108.22	74.8577	105.97	46.13	3.322	0	0	0	1
1440	2013-08-12	28.7104	0.3576	0.10782	108.97	74.1728	106.11	45.92	3.3174	0	0	0	0
1441	2013-08-13	29.0306	0.3666	0.10977	109.82	73.7685	106.83	46.69	3.336	1	1	0	1
1442	2013-08-14	28.8934	0.3635	0.10857	110.2	73.3972	106.85	46.28	3.3471	0	0	0	0
1443	2013-08-16	29.1637	0.3665	0.10977	110.4	72.539	107.46	46.94	3.3361	1	1	0	1
1444	2013-08-19	28.178	0.3666	0.10979	109.9	71.7221	107.1	45.31	3.3415	1	1	0	0
1445	2013-08-20	27.9368	0.3658	0.11052	110.15	71.6479	104.97	44.9	3.3111	0	1	0	0
1446	2013-08-21	27.8245	0.3627	0.10885	109.81	71.3095	103.85	44.67	3.3339	0	0	0	0
1447	2013-08-22	28.3984	0.3626	0.10897	109.9	71.7716	105.03	45.55	3.324	0	1	1	1
1448	2013-08-23	29.0181	0.3658	0.11054	111.04	72.2172	106.42	46.8	3.3121	1	1	1	1
1449	2013-08-26	29.0556	0.365	0.11019	110.73	71.8624	105.92	46.61	3.3126	0	0	0	0
1450	2013-08-27	29.5006	0.3585	0.1082	114.36	71.6396	109.01	47.45	3.3122	0	0	0	1
1451	2013-08-28	29.7751	0.3544	0.10626	116.61	73.3064	110.1	48.23	3.3341	0	0	1	1
1452	2013-08-29	29.6129	0.3544	0.10569	115.16	72.0109	108.8	47.24	3.3544	1	0	0	0
1453	2013-08-30	29.0556	0.3544	0.1056	114.01	71.9202	107.65	46.49	3.3518	1	0	0	0
1454	2013-09-03	29.721	0.3562	0.10572	115.68	71.9119	108.54	47.15	3.3694	1	1	0	1
1455	2013-09-04	29.6587	0.3541	0.10495	114.91	72.4153	107.23	47.36	3.3747	0	0	1	1
1456	2013-09-05	29.7502	0.3521	0.10347	115.26	72.0769	108.37	47.04	3.405	0	0	0	0
1457	2013-09-06	29.9789	0.356	0.10464	116.12	71.9944	110.53	47.6	3.3934	1	1	0	1
1458	2013-09-09	29.9332	0.3556	0.10541	113.72	72.6463	109.52	48	3.3747	0	1	1	1
1459	2013-09-10	29.8791	0.3552	0.10554	111.25	72.4647	107.39	47.73	3.3632	0	1	0	0
1460	2013-09-11	29.8749	0.3512	0.10422	111.5	73.3064	107.56	47.98	3.3674	0	0	1	1
1461	2013-09-12	29.9872	0.3569	0.10605	112.63	72.5968	108.6	47.9	3.3686	1	1	0	0
1462	2013-09-13	30.2201	0.3585	0.10659	112.78	72.9434	108.21	48.6	3.3631	1	1	1	1
1463	2013-09-16	30.1702	0.3544	0.10603	110.07	73.1661	106.59	48.52	3.3439	0	0	1	0
1464	2013-09-17	30.1952	0.3529	0.10527	108.19	73.3889	105.42	48.45	3.3537	0	0	1	0
1465	2013-09-18	29.7793	0.3542	0.10582	110.6	73.917	108.07	48.2	3.3099	1	1	1	0
1466	2013-09-19	29.7044	0.3544	0.1059	108.76	73.6695	106.39	48.2	3.2954	1	1	0	1
1467	2013-09-20	29.825	0.3503	0.10617	109.22	73.1579	104.68	48.3	3.2991	0	1	0	1
1468	2013-09-23	29.4465	0.3651	0.11049	108.16	72.407	103.59	47.8	3.3101	1	1	0	0
1469	2013-09-24	29.5588	0.3613	0.10899	108.64	72.0852	103.13	48.14	3.3196	0	0	0	1
1470	2013-09-25	30.3574	0.3676	0.11154	108.32	71.9037	102.66	49.27	3.2975	1	1	0	1
1471	2013-09-26	30.8149	0.3666	0.11071	109.21	71.8459	103.03	50.07	3.3102	0	0	0	1
1472	2013-09-27	31.027	0.3646	0.11055	108.63	71.7056	102.87	50.73	3.3039	0	0	0	1
1473	2013-09-30	30.3615	0.365	0.11074	108.37	70.996	102.33	49.66	3.2971	1	1	0	0
1474	2013-10-01	30.27	0.3627	0.1103	107.94	70.963	102.04	49.4	3.2881	0	0	0	0
1475	2013-10-02	30.0912	0.365	0.11159	109.19	71.029	104.1	49.24	3.2716	1	1	1	0
1476	2013-10-03	30.112	0.3634	0.11168	109	70.5504	103.31	49.28	3.2586	0	1	0	1
1477	2013-10-04	29.6711	0.3666	0.11224	109.46	71.227	103.84	48.45	3.2679	1	1	1	0
1478	2013-10-07	29.4424	0.3634	0.1116	109.68	70.8805	103.03	48.24	3.2584	0	0	0	0
1479	2013-10-08	29.1637	0.3642	0.11131	110.16	70.5587	103.49	47.64	3.2721	1	0	0	0
1480	2013-10-09	28.9059	0.3613	0.1095	109.06	70.2699	101.61	47.35	3.2994	0	0	0	0
1481	2013-10-10	29.2511	0.3625	0.11011	111.8	70.996	103.01	47.8	3.2942	1	1	1	1
1482	2013-10-11	29.2843	0.3585	0.10904	111.28	71.7469	102.02	47.87	3.2887	0	0	1	1
1483	2013-10-14	29.1512	0.3585	0.1091	111.04	72.2832	102.41	47.95	3.2894	1	1	1	1
1484	2013-10-15	29.2802	0.3585	0.10888	109.96	71.6149	101.21	47.27	3.2869	1	0	0	0
1485	2013-10-16	29.197	0.362	0.11003	110.86	72.0439	102.29	47.65	3.2879	1	1	1	1
1486	2013-10-17	29.3218	0.3602	0.11068	109.11	72.1842	100.67	48.3	3.2551	0	1	1	1
1487	2013-10-18	28.9599	0.3552	0.1093	109.94	72.242	100.81	47.53	3.2492	0	0	1	0
1488	2013-10-21	29.0722	0.3503	0.10809	109.64	71.9779	99.22	48.05	3.2407	0	0	0	1
1489	2013-10-22	29.3509	0.3507	0.10922	109.97	72.5968	97.8	48.55	3.213	1	1	1	1
1490	2013-10-23	29.0972	0.3539	0.10991	107.8	72.2915	96.86	48.45	3.221	1	1	0	0
1491	2013-10-24	29.1138	0.3585	0.11119	106.99	72.9598	97.11	48.59	3.2252	1	1	1	1
1492	2013-10-25	28.9807	0.3583	0.11121	106.93	72.5885	97.85	48.37	3.2203	0	1	0	0
1493	2013-10-28	28.5149	0.3513	0.1091	109.61	72.8031	98.68	47.5	3.2221	0	0	1	0
1494	2013-10-29	28.9474	0.3565	0.11036	109.01	73.3807	98.2	48.1	3.229	1	1	1	1
1495	2013-10-30	29.4465	0.3577	0.11131	109.86	73.2817	96.77	48.73	3.2251	1	1	0	1
1496	2013-10-31	29.2344	0.3626	0.11113	108.84	73.95	96.38	47.87	3.2647	1	0	1	0
1497	2013-11-04	30.3907	0.3707	0.11281	106.23	75.9964	94.62	48.55	3.2839	1	1	1	1
1498	2013-11-05	30.374	0.3789	0.11484	105.33	75.9056	93.37	48.97	3.2969	1	1	0	1
1499	2013-11-06	30.9854	0.3898	0.11891	105.24	76.9206	94.8	50.5	3.2802	1	1	1	1
1500	2013-11-08	30.0413	0.387	0.1164	105.12	77.0369	94.6	48.14	3.3267	0	0	1	0
1501	2013-11-11	30.0621	0.385	0.11579	106.4	77.228	95.14	48.52	3.3254	0	0	1	1
1502	2013-11-12	29.9456	0.3893	0.11743	105.81	76.9871	93.04	48.46	3.3159	1	1	0	0
1503	2013-11-13	30.1453	0.3676	0.11077	107.12	76.9206	93.88	48.72	3.3083	0	0	0	1
1504	2013-11-14	29.8375	0.3634	0.10992	108.54	77.4439	93.76	48.45	3.3088	0	0	1	0
1505	2013-11-15	29.8084	0.3674	0.11132	108.5	79.147	93.84	48.41	3.2992	1	1	1	0
1506	2013-11-18	30.0621	0.3635	0.11036	108.47	79.2966	93.03	48.81	3.2953	0	0	1	1
1507	2013-11-20	30.1078	0.3703	0.11194	108.06	78.6569	93.33	48.28	3.3079	1	1	0	0
1508	2013-11-21	30.1869	0.3723	0.11257	110.08	78.6652	95.44	49.05	3.3025	1	1	1	1
1509	2013-11-22	29.6587	0.3736	0.11369	111.05	78.931	94.84	48.43	3.283	1	1	1	0
1510	2013-11-27	30.0912	0.3732	0.11403	111.31	77.9258	92.3	49.24	3.2687	0	1	0	1
1511	2013-11-29	29.9872	0.3748	0.11489	109.69	77.66	92.72	49.16	3.2625	1	1	0	0
1512	2013-12-02	30.0454	0.3757	0.1146	111.45	77.6932	93.82	49.14	3.2752	1	0	1	0
1513	2013-12-03	29.9872	0.3748	0.11441	112.62	78.416	96.04	48.76	3.2813	0	0	1	0
1514	2013-12-04	29.3342	0.3723	0.11329	111.88	78.6486	97.2	47.69	3.2887	0	0	1	0
1515	2013-12-05	28.544	0.3736	0.11429	110.98	78.2	97.38	47.01	3.2694	1	1	0	0
1516	2013-12-06	28.6979	0.3727	0.1146	111.61	79.4627	97.65	47.63	3.251	0	1	1	1
1517	2013-12-11	29.0722	0.3722	0.11546	109.7	78.3079	97.44	48.31	3.2271	0	1	0	1
1518	2013-12-12	29.0556	0.3727	0.11506	108.67	79.2218	97.5	48.15	3.238	1	0	1	0
1519	2013-12-13	28.6022	0.3732	0.1149	108.83	79.1802	96.6	47.38	3.2424	1	0	0	0
1520	2013-12-16	28.3028	0.3732	0.11495	110.47	80.767	97.48	46.77	3.2424	1	1	1	0
1521	2013-12-17	27.7205	0.3723	0.11461	108.44	80.3766	97.22	45.9	3.2469	0	0	0	0
1522	2013-12-18	27.8786	0.374	0.11475	109.63	82.6944	97.8	46.49	3.274	1	1	1	1
1523	2013-12-19	27.7995	0.3764	0.11467	110.29	82.603	98.77	45.49	3.2831	1	0	0	0
1524	2013-12-20	28.1281	0.3749	0.11433	111.77	81.9799	99.32	46.47	3.2782	0	0	0	1
1525	2013-12-23	28.4775	0.3772	0.11538	111.56	81.8387	98.91	46.79	3.2663	1	1	0	1
1526	2014-01-03	28.7229	0.3813	0.11535	106.89	82.6695	93.96	47.11	3.308	1	0	1	1
1527	2014-01-07	29.0972	0.3817	0.1156	107.35	83.9655	93.67	47.67	3.3053	1	1	1	1
1528	2014-01-08	29.4008	0.3821	0.11518	107.15	83.6913	92.33	48	3.3159	1	0	0	1
1529	2014-01-13	29.6711	0.3886	0.11728	106.75	81.8719	91.8	48.39	3.3125	1	1	0	1
1530	2014-01-17	29.3426	0.3952	0.11798	106.48	82.3787	94.37	47.67	3.3505	1	1	1	0
1531	2014-01-21	28.9433	0.3952	0.11814	106.73	81.8304	94.99	47.17	3.342	1	1	0	0
1532	2014-01-22	28.4192	0.3952	0.11822	108.27	81.3153	96.73	46.14	3.3438	1	1	0	0
1533	2014-01-23	28.2903	0.3924	0.11838	107.58	80.5593	97.32	46.35	3.3083	0	1	0	1
1534	2014-01-27	28.0574	0.3871	0.11648	106.69	78.8562	95.72	46.13	3.3217	0	0	0	0
1535	2014-01-28	28.5523	0.3878	0.11689	107.41	79.4627	97.41	46.83	3.3153	1	1	1	1
1536	2014-01-29	28.1156	0.3815	0.11508	107.85	79.0141	97.36	46.41	3.3106	0	0	0	0
1537	2014-01-30	27.3046	0.3853	0.11567	107.95	78.0836	98.23	44.88	3.3311	1	1	0	0
1538	2014-01-31	26.7015	0.3798	0.114	106.4	76.5634	97.49	43.27	3.3354	0	0	0	0
1539	2014-02-03	26.452	0.3828	0.11529	106.04	74.8104	96.43	43.04	3.3192	1	1	0	0
1540	2014-02-04	26.0693	0.3828	0.11586	105.78	74.7855	97.19	42.32	3.3044	1	1	0	0
1541	2014-02-05	26.2357	0.3805	0.11548	106.25	74.42	97.38	42.63	3.2935	0	0	0	1
1542	2014-02-06	26.7265	0.3793	0.11549	107.19	75.1311	97.84	43.89	3.2873	0	1	1	1
1543	2014-02-07	26.9386	0.3789	0.1152	109.57	75.7837	99.88	44.21	3.2839	0	0	1	1
1544	2014-02-10	26.9261	0.3797	0.11588	108.63	74.8969	100.06	43.97	3.2755	1	1	0	0
1545	2014-02-11	27.5001	0.3789	0.11558	108.68	76.0012	99.94	44.71	3.2802	0	0	1	1
1546	2014-02-12	28.3444	0.3788	0.11471	108.79	76.202	100.37	45.85	3.3003	0	0	1	1
1547	2014-02-13	27.7787	0.3772	0.11478	108.73	76.4949	100.35	45.89	3.2827	0	1	1	1
1548	2014-02-18	28.0532	0.3779	0.11599	110.46	78.7036	102.43	46.06	3.2572	1	1	1	1
1549	2014-02-19	27.4751	0.3723	0.11348	110.47	78.6032	103.31	45.4	3.2874	0	0	0	0
1550	2014-02-20	28.3069	0.3738	0.11338	110.3	79.7913	102.92	46.47	3.2927	1	0	1	1
1551	2014-02-21	27.9409	0.3797	0.11561	109.85	79.5068	102.2	45.95	3.2824	1	1	0	0
1552	2014-02-24	28.5024	0.3741	0.1139	110.64	80.6865	102.82	47.03	3.285	0	0	1	1
1553	2014-03-03	26.7764	0.3528	0.10681	111.2	79.9	104.92	44.15	3.3004	0	0	0	0
1554	2014-03-04	27.367	0.3569	0.10873	109.3	80.7534	103.33	45.18	3.2807	1	1	1	1
1555	2014-03-05	27.1382	0.3585	0.10955	107.76	78.4777	101.45	44.94	3.273	1	1	0	0
1556	2014-03-06	27.1258	0.3585	0.11045	108.1	78.4443	101.56	45.2	3.2426	1	1	0	1
1557	2014-03-07	26.7639	0.3577	0.11023	109	79.4733	102.58	44.86	3.245	0	0	1	0
1558	2014-03-10	26.8762	0.3565	0.10997	108.08	79.9	101.12	44.77	3.2417	0	0	1	0
1559	2014-03-11	26.872	0.354	0.10898	108.55	78.6534	100.03	44.75	3.2498	0	0	0	0
1560	2014-03-12	26.7182	0.3471	0.10698	108.02	78.8207	97.99	44.58	3.2442	0	0	1	0
1561	2014-03-13	26.0444	0.3536	0.10867	107.39	78.3439	98.2	43.57	3.2527	1	1	0	0
1562	2014-03-14	26.1109	0.3512	0.10826	108.57	78.2016	98.89	43.59	3.2394	0	0	0	1
1563	2014-03-17	26.4145	0.3556	0.10979	106.24	78.9128	98.08	43.97	3.2401	1	1	1	1
1564	2014-03-18	27.0093	0.3586	0.11093	106.79	79.2391	99.7	45.41	3.2296	1	1	1	1
1565	2014-03-24	26.5768	0.3575	0.11087	106.81	79.1805	99.6	43.96	3.2332	0	0	0	0
1566	2014-03-26	26.6183	0.3577	0.11024	107.03	79.2307	100.26	44.11	3.2456	1	0	1	1
1567	2014-03-28	26.9843	0.3503	0.10799	108.07	81.7407	101.67	44.63	3.2441	0	0	1	1
1568	2014-04-01	27.4294	0.3479	0.10756	105.62	81.7658	99.74	45.32	3.2362	0	0	1	1
1569	2014-04-02	27.3919	0.3563	0.10984	104.79	81.9498	99.62	45.01	3.2443	1	1	1	0
1570	2014-04-09	26.9843	0.3641	0.11276	107.98	81.4311	103.6	44.63	3.2186	1	1	0	0
1571	2014-04-10	26.6267	0.3691	0.1149	107.46	80.9709	103.4	43.88	3.2118	1	1	0	0
1572	2014-04-15	26.165	0.3666	0.11332	108.74	82.5606	103.75	43.42	3.2358	0	0	1	0
1573	2014-04-23	27.0634	0.3666	0.11347	109.11	84.0833	101.44	45.02	3.2317	1	1	1	1
1574	2014-04-24	27.0592	0.3658	0.11368	110.33	83.6733	101.94	44.44	3.2159	0	1	0	0
1575	2014-04-25	26.6391	0.3627	0.11269	109.58	84.008	100.6	44.25	3.2172	0	0	1	0
1576	2014-04-28	27.1465	0.3609	0.11228	108.12	84.6438	100.84	44.84	3.2134	0	0	1	1
1577	2014-05-02	27.9368	0.3707	0.11613	108.59	85.3466	99.76	46.45	3.1953	1	1	1	1
1578	2014-05-06	27.6831	0.3714	0.11667	107.06	85.8988	99.5	46.52	3.1869	1	1	1	1
1579	2014-05-07	26.9802	0.3719	0.11697	108.13	86.2669	100.77	45.21	3.1825	1	1	1	0
1580	2014-05-09	27.0176	0.3789	0.11755	107.89	85.8755	99.99	44.85	3.2207	1	1	0	0
1581	2014-05-13	26.635	0.3744	0.11577	109.24	86.2209	101.7	44.22	3.2344	0	0	1	0
1582	2014-05-14	26.427	0.3812	0.11773	110.19	86.1619	102.37	43.48	3.2355	1	1	0	0
1583	2014-05-15	25.8572	0.3834	0.11845	110.44	84.89	101.5	41	3.2356	1	1	0	0
1584	2014-05-16	25.4371	0.3832	0.11849	109.75	84.8563	102.02	40.36	3.2362	0	1	0	0
1585	2014-05-19	25.2957	0.3832	0.11862	109.37	84.9658	102.61	40.81	3.2306	1	1	1	1
1586	2014-05-20	25.4172	0.3755	0.11587	109.69	84.7973	102.44	40.25	3.2337	0	0	0	0
1587	2014-05-21	25.4389	0.3686	0.1137	110.55	85.9429	104.07	40.2	3.2361	0	0	1	0
1588	2014-05-22	25.7772	0.3678	0.11376	110.36	85.4965	103.74	40.47	3.233	0	1	0	1
1589	2014-05-23	25.9724	0.3742	0.11577	110.54	85.3448	104.35	40.66	3.2325	1	1	0	1
1590	2014-05-27	26.2153	0.3755	0.1164	110.02	85.3785	104.11	41.37	3.2236	1	1	1	1
1591	2014-06-03	26.263	0.3821	0.1184	108.82	84.5615	102.66	41.2	3.2262	1	1	0	0
1592	2014-06-05	25.7642	0.3818	0.11852	108.79	84.6963	102.48	40.45	3.2163	0	1	1	0
1593	2014-06-10	26.7531	0.386	0.11918	109.52	85.4628	104.35	41.62	3.2378	1	1	1	1
1594	2014-06-11	26.4929	0.3869	0.11929	109.95	85.8755	104.4	41.4	3.2443	1	1	1	0
1595	2014-06-12	26.9353	0.3928	0.12114	113.02	85.6312	106.53	42	3.2406	1	1	0	1
1596	2014-06-13	27.33	0.3946	0.12158	113.41	86.4652	106.91	42.51	3.2448	1	1	1	1
1597	2014-06-16	27.3864	0.3968	0.12253	112.94	86.6926	106.9	43.07	3.2384	1	1	1	1
1598	2014-06-18	27.703	0.3947	0.12176	114.26	86.5325	105.97	43.42	3.2315	0	0	0	1
1599	2014-06-20	28.1367	0.3969	0.12264	114.81	87.4591	107.26	43.99	3.2339	1	1	1	1
1600	2014-06-23	28.0934	0.3969	0.12292	114.12	87.9224	106.17	43.9	3.2287	1	1	1	0
1601	2014-06-24	28.4621	0.4105	0.12703	114.46	86.5325	106.03	44.24	3.2272	1	1	0	1
1602	2014-06-25	27.8982	0.4113	0.1278	114	86.0355	106.5	44.1	3.2201	1	1	0	0
1603	2014-06-26	28.7006	0.4104	0.1273	113.21	85.9429	105.84	45.07	3.2248	0	0	0	1
1604	2014-06-27	28.4837	0.4083	0.12685	113.3	85.2522	105.74	45.2	3.2167	0	0	0	1
1605	2014-06-30	28.6269	0.4209	0.13142	112.36	84.8058	105.37	45.15	3.2029	1	1	0	0
1606	2014-07-01	28.4013	0.42	0.13108	112.29	85.3785	105.34	45	3.2081	0	0	1	0
1607	2014-07-03	28.9131	0.4235	0.13128	111	86.4146	104.06	45.17	3.2249	1	1	1	1
1608	2014-07-07	28.3666	0.415	0.12871	110.24	86.4652	103.53	44	3.2248	0	0	1	0
1609	2014-07-08	27.9329	0.4139	0.12837	108.94	86.6168	103.4	43.99	3.2222	0	0	1	0
1610	2014-07-09	27.9112	0.4063	0.12606	108.28	87.2233	102.29	43.62	3.2206	0	0	1	0
1611	2014-07-10	27.4471	0.4077	0.12586	108.67	86.3978	102.93	42.5	3.2369	1	0	0	0
1612	2014-07-11	26.996	0.4118	0.12675	106.66	85.6986	100.83	41.98	3.2469	1	1	0	0
1613	2014-07-16	27.4254	0.4245	0.12942	105.85	87.4086	101.2	42.65	3.2829	1	1	1	1
1614	2014-07-17	27.1261	0.4231	0.1288	107.89	86.1788	103.19	42.09	3.2849	0	0	0	0
1615	2014-07-18	27.1738	0.414	0.1258	107.24	86.5325	103.13	42.19	3.2958	0	0	1	1
1616	2014-07-23	26.8268	0.4192	0.12775	108.03	87.8129	103.12	41.57	3.2818	1	1	1	0
1617	2014-07-25	26.8052	0.4231	0.12929	108.39	86.9116	102.09	41.64	3.2734	1	1	0	1
1618	2014-07-28	26.5493	0.4166	0.12766	107.57	87.914	101.67	41.01	3.2644	0	0	1	0
1619	2014-07-29	26.7097	0.4157	0.12676	107.72	87.2233	100.97	41.03	3.2808	0	0	0	1
1620	2014-07-30	26.5102	0.4214	0.12797	106.51	86.9705	100.27	40.87	3.2858	1	1	0	0
1621	2014-08-01	25.7121	0.4191	0.12702	104.84	83.2222	97.88	39.65	3.3003	0	0	0	0
1622	2014-08-04	25.8466	0.4192	0.12688	105.41	84.3425	98.29	40.15	3.3001	1	0	1	1
1623	2014-08-05	25.3695	0.4219	0.1271	104.61	82.7168	97.38	38.98	3.3168	1	1	0	0
1624	2014-08-07	25.3651	0.4168	0.12517	105.44	82.7757	97.34	39.06	3.3251	0	0	1	1
1625	2014-08-11	25.222	0.4162	0.12544	104.68	83.7426	98.08	38.76	3.3167	0	1	1	0
1626	2014-08-12	25.2957	0.4148	0.12486	103.02	83.539	97.37	39.01	3.3206	0	0	0	1
1627	2014-08-14	24.8056	0.4114	0.12389	102.01	84.0479	95.58	37.99	3.3196	0	0	1	0
1628	2014-08-18	24.836	0.4229	0.12741	101.6	84.4126	96.41	38.26	3.3185	1	1	1	1
1629	2014-08-19	25.1136	0.423	0.12718	101.56	84.3872	94.48	38.58	3.3262	1	0	0	1
1630	2014-08-22	25.1049	0.4235	0.12748	102.29	83.5475	93.65	38.28	3.331	1	1	0	0
1631	2014-08-25	25.1569	0.42	0.12607	102.65	83.7595	93.35	38.3	3.3318	0	0	1	1
1632	2014-08-27	25.6037	0.4196	0.126	102.72	84.4211	93.88	39.03	3.3316	0	0	1	1
1633	2014-08-29	25.5039	0.4279	0.12788	103.19	84.3617	95.96	38.63	3.3499	1	1	0	0
1634	2014-09-03	25.5126	0.4221	0.12606	102.77	84.0649	95.54	38.76	3.3461	0	0	0	1
1635	2014-09-04	25.6341	0.4192	0.12333	101.83	83.4287	94.45	38.1	3.3971	0	0	0	0
1636	2014-09-05	25.3304	0.4166	0.12257	100.82	84.1921	93.29	37.9	3.3991	0	0	1	0
1637	2014-09-08	25.248	0.4174	0.12226	100.2	82.9283	92.66	37.44	3.4252	1	0	0	0
1638	2014-09-09	25.0138	0.4166	0.12169	99.16	82.606	92.75	36.96	3.4169	0	0	0	0
1639	2014-09-10	24.8533	0.419	0.1224	98.04	82.114	91.67	37.06	3.4211	1	1	0	1
1640	2014-09-11	24.6495	0.4131	0.121	98.08	82.3006	92.83	36.71	3.4195	0	0	1	0
1641	2014-09-12	24.3762	0.4126	0.12112	97.11	81.2404	92.27	36.35	3.4103	0	1	0	0
1642	2014-09-15	24.0379	0.4139	0.12137	96.65	81.673	92.92	35.72	3.4108	1	1	1	0
1643	2014-09-16	23.6909	0.4052	0.1191	99.05	82.6399	94.88	35.39	3.4067	0	0	1	0
1644	2014-09-17	23.782	0.4013	0.1177	98.97	82.343	94.42	35.68	3.4344	0	0	0	1
1645	2014-09-22	24.0986	0.4081	0.11894	96.97	81.885	91.52	35.57	3.4261	1	1	0	0
1646	2014-09-23	23.847	0.4103	0.11975	96.85	81.4524	91.56	35.2	3.4255	1	1	0	0
1647	2014-09-24	23.7039	0.4085	0.11866	96.95	81.2743	92.8	34.91	3.444	0	0	0	0
1648	2014-09-25	23.6172	0.4104	0.11865	97	79.9426	92.53	34.67	3.4571	1	0	0	0
1649	2014-09-26	23.4003	0.41	0.11774	97	80.9435	93.54	34.26	3.4731	0	0	1	0
1650	2014-09-29	23.2658	0.4096	0.11793	97.2	80.0953	94.57	34	3.4783	0	1	0	0
1651	2014-09-30	23.114	0.4107	0.1176	94.67	79.773	91.16	33.62	3.4924	1	0	0	0
1652	2014-10-01	22.9579	0.4078	0.11664	94.16	78.7636	90.73	33.34	3.4939	0	0	0	0
1653	2014-10-02	21.8822	0.4016	0.11529	93.42	79.1368	91.01	32.21	3.4807	0	0	1	0
1654	2014-10-03	21.9993	0.4013	0.11376	92.31	79.6627	89.74	31.96	3.5266	0	0	1	0
1655	2014-10-06	22.4461	0.4012	0.11462	92.79	80.1716	90.34	32.55	3.4845	0	1	1	1
1656	2014-10-07	22.2509	0.4013	0.11522	92.11	79.1962	88.85	32.29	3.478	1	1	0	0
1657	2014-10-08	22.0427	0.3948	0.1136	91.38	80.248	87.31	32.52	3.4604	0	0	1	1
1658	2014-10-09	21.6827	0.3947	0.11372	90.05	77.8815	85.77	31.55	3.4701	0	1	0	0
1659	2014-10-10	21.0451	0.386	0.11072	90.21	77.6949	85.82	30.82	3.4884	0	0	0	0
1660	2014-10-13	21.0364	0.3834	0.11029	88.89	77.0503	85.74	30.69	3.4513	0	0	0	0
1661	2014-10-14	20.9453	0.3853	0.11052	85.04	76.8043	81.84	30.63	3.486	1	1	0	0
1662	2014-10-15	20.3945	0.3842	0.11122	83.78	76.5244	81.78	30.31	3.449	0	1	0	0
1663	2014-10-16	20.1125	0.3713	0.10772	84.47	76.8467	82.7	29.7	3.4566	0	0	1	0
1664	2014-10-17	20.6417	0.3747	0.10834	86.16	77.3641	82.75	30.54	3.4606	1	1	1	1
1665	2014-10-20	20.646	0.3738	0.10832	85.4	77.8391	82.71	30.64	3.4521	0	0	1	1
1666	2014-10-21	21.0191	0.3773	0.10877	86.22	79.4337	82.81	31.21	3.4731	1	1	1	1
1667	2014-10-22	21.4138	0.3799	0.10877	84.71	78.9926	80.52	30.97	3.4924	1	1	0	0
1668	2014-10-23	21.5569	0.3826	0.10942	86.83	79.8239	82.09	31.45	3.4967	1	1	1	1
1669	2014-10-24	21.4962	0.3834	0.1098	86.13	80.1462	81.01	31.43	3.4887	1	1	1	0
1670	2014-10-27	21.353	0.3863	0.11089	85.83	79.4846	81	31.47	3.4851	1	1	0	1
1671	2014-10-28	21.3921	0.3813	0.10987	86.03	80.6636	81.42	31.5	3.4713	0	0	1	1
1672	2014-10-29	21.635	0.38	0.10923	87.12	80.231	82.2	31.57	3.5009	0	0	0	1
1673	2014-10-30	21.7781	0.3816	0.10889	86.24	80.1123	81.12	31.74	3.504	1	0	0	1
1674	2014-10-31	21.7608	0.3825	0.10868	85.86	82.0292	80.54	31.36	3.5215	1	0	1	0
1675	2014-11-03	21.6133	0.3781	0.10688	84.78	80.7993	78.78	31.35	3.5358	0	0	0	0
1676	2014-11-04	21.3747	0.3738	0.10619	82.82	80.1716	77.19	31.16	3.5194	0	0	0	0
1677	2014-11-05	21.4875	0.369	0.10427	82.95	80.6381	78.68	30.73	3.5393	0	0	1	0
1678	2014-11-06	21.635	0.3703	0.10369	82.86	81.6475	77.91	31.06	3.5775	1	0	1	1
1679	2014-11-07	21.4311	0.3729	0.10456	83.39	82.5189	78.65	30.75	3.56	1	1	1	0
1680	2014-11-10	21.7651	0.3739	0.10499	82.34	82.2541	77.4	31.03	3.5631	1	1	0	1
1681	2014-11-11	21.3661	0.3738	0.10525	81.67	82.3651	77.94	30.91	3.549	0	1	1	0
1682	2014-11-12	21.1579	0.3717	0.10435	80.38	81.4852	77.18	30.53	3.5618	0	0	0	0
1683	2014-11-13	20.8542	0.3711	0.10448	77.92	80.8701	74.21	30.17	3.5504	0	1	0	0
1684	2014-11-14	20.8369	0.372	0.10515	79.41	81.2374	75.82	30.26	3.5343	1	1	1	1
1685	2014-11-17	20.9323	0.3754	0.10538	79.31	81.2545	75.64	30.22	3.5629	1	1	1	0
1686	2014-11-18	21.1275	0.3713	0.10492	78.47	81.0495	74.61	30.58	3.5372	0	0	0	1
1687	2014-11-19	21.0798	0.3735	0.10544	78.1	81.6817	74.58	30.45	3.5407	1	1	1	0
1688	2014-11-20	21.1535	0.3725	0.10515	79.33	81.8611	75.58	30.73	3.5431	0	0	1	1
1689	2014-11-21	22.008	0.375	0.10463	80.36	82.7069	76.51	31.28	3.5826	1	0	1	1
1690	2014-11-24	21.9473	0.3729	0.10451	79.68	81.7756	75.78	31.52	3.5633	0	0	0	1
1691	2014-11-25	21.7955	0.3755	0.10555	78.33	80.9726	74.09	31.45	3.5558	1	1	0	0
1692	2014-11-26	21.4702	0.3755	0.1063	77.75	80.7163	73.69	31.08	3.5316	1	1	0	0
1693	2014-11-28	20.1776	0.365	0.1024	70.15	77.3503	66.15	28.82	3.5616	0	0	0	0
1694	2014-12-02	19.913	0.362	0.10125	70.54	80.4685	66.88	28.55	3.5758	0	0	1	0
1695	2014-12-03	19.6918	0.3668	0.10196	69.92	81.1178	67.38	27.95	3.5947	1	1	1	0
1696	2014-12-04	19.2711	0.3706	0.10351	69.64	80.6223	66.81	27.65	3.5759	1	1	0	0
1697	2014-12-05	19.1843	0.3624	0.10042	69.07	80.1524	65.84	27.13	3.61	0	0	0	0
1698	2014-12-09	18.7246	0.3546	0.09899	66.84	78.0679	63.82	26.71	3.5884	0	0	0	0
1699	2014-12-10	18.6855	0.3502	0.09787	64.24	75.7527	60.94	26.62	3.569	0	0	0	0
1700	2014-12-11	18.2171	0.3422	0.09521	63.68	76.2055	59.95	25.84	3.584	0	0	1	0
1701	2014-12-12	17.6836	0.3369	0.09338	61.85	73.9842	57.81	25.3	3.6038	0	0	0	0
1702	2014-12-15	17.4103	0.3384	0.09386	61.06	74.2405	55.91	24.83	3.604	1	1	1	0
1703	2014-12-16	17.8267	0.3356	0.09367	59.86	73.8219	55.93	25.55	3.5814	0	0	0	1
1704	2014-12-17	18.2171	0.3231	0.08958	61.18	76.0517	56.47	26.12	3.6262	0	0	1	1
1705	2014-12-18	18.434	0.3363	0.09231	59.27	77.88	54.11	26.25	3.6427	1	1	1	1
1706	2014-12-19	19.1019	0.3353	0.09177	61.38	79.9987	56.52	26.91	3.6578	0	0	1	1
1707	2014-12-22	19.0933	0.3493	0.09571	60.11	79.7338	55.26	27.06	3.6554	1	1	0	1
1708	2014-12-23	19.2711	0.3493	0.09484	61.69	80.8103	57.12	27.2	3.6785	1	0	1	1
1709	2014-12-29	19.2711	0.3623	0.09866	57.88	79.5117	53.61	26.79	3.6794	1	1	0	0
1710	2014-12-30	19.0933	0.3563	0.09657	57.9	79.469	54.12	26.79	3.6891	0	0	0	1
1711	2015-01-05	18.0436	0.3441	0.09124	53.11	77.1367	50.04	24.98	3.7671	0	0	0	0
1712	2015-01-07	18.5771	0.3458	0.09096	51.15	77.5041	48.65	25.45	3.7989	1	0	1	1
1713	2015-01-08	18.9761	0.3458	0.09108	50.96	78.7941	48.79	25.83	3.805	1	1	1	1
1714	2015-01-09	18.7636	0.3371	0.0889	50.11	78.683	48.36	25.67	3.7917	0	0	0	0
1715	2015-01-12	18.5771	0.3362	0.08862	47.43	77.1709	46.07	25.32	3.7915	0	0	0	0
1716	2015-01-13	18.6942	0.3449	0.09048	46.59	76.8889	45.89	25.34	3.8155	1	1	0	1
1717	2015-01-14	17.9569	0.3362	0.08812	48.69	76.6668	48.48	24.75	3.8157	0	0	0	0
1718	2015-01-15	18.8243	0.3311	0.0853	47.67	76.0004	46.25	25.09	3.8705	0	0	0	1
1719	2015-01-16	19.3709	0.331	0.08493	50.17	77.8458	48.69	25.84	3.893	0	0	1	1
1720	2015-01-20	19.2494	0.3257	0.08333	47.99	77.8201	46.39	25.71	3.9068	0	0	0	0
1721	2015-01-21	19.6831	0.3223	0.08284	49.03	78.4865	47.78	26.3	3.8779	0	0	1	1
1722	2015-01-22	19.7872	0.3231	0.08189	48.52	79.3408	46.31	26.04	3.9524	1	0	1	0
1723	2015-01-23	19.7786	0.3234	0.08119	48.79	77.6493	45.59	25.57	3.9992	1	0	0	0
1724	2015-01-26	19.9174	0.3171	0.07995	48.16	78.3925	45.15	25.95	3.9821	0	0	1	1
1725	2015-01-27	19.7482	0.316	0.08043	49.6	77.7005	46.23	26.02	3.9212	0	1	0	1
1726	2015-01-28	19.5443	0.3176	0.08099	48.47	75.1376	44.45	24.83	3.9436	1	1	0	0
1727	2015-01-29	19.1019	0.3166	0.08053	49.13	74.8215	44.53	25.11	3.9235	0	0	0	1
1728	2015-01-30	19.1496	0.3159	0.08037	52.99	74.6848	48.24	25.28	3.9249	0	0	0	1
1729	2015-02-02	19.9087	0.3178	0.08167	54.75	76.5301	49.57	26.14	3.8754	1	1	1	1
1730	2015-02-03	20.4162	0.3187	0.08297	57.91	78.8112	53.05	27.16	3.8392	1	1	1	1
1731	2015-02-04	20.2123	0.3227	0.08362	54.16	78.1362	48.45	26.29	3.8815	1	1	0	0
1732	2015-02-05	20.4335	0.3222	0.08356	56.57	78.9051	50.48	27.13	3.8478	0	0	1	1
1733	2015-02-06	20.2774	0.3227	0.08268	57.8	78.7588	51.69	26.46	3.9022	1	0	0	0
1734	2015-02-09	20.3858	0.3227	0.08257	58.34	78.8104	52.86	26.56	3.9158	1	0	1	1
1735	2015-02-10	20.4032	0.3226	0.08227	56.43	78.3371	50.02	26.55	3.9183	0	0	0	0
1736	2015-02-11	20.0388	0.3187	0.08096	54.66	77.9841	48.84	26.34	3.9234	0	0	0	0
1737	2015-02-12	20.2991	0.3186	0.08178	57.05	79.5077	51.21	26.92	3.8921	0	1	1	1
1738	2015-02-13	20.4335	0.3227	0.08281	61.52	80.3684	52.78	27.03	3.8992	1	1	1	1
1739	2015-02-17	20.8195	0.3284	0.08423	62.53	80.093	53.53	27.62	3.899	1	1	0	1
1740	2015-02-18	21.0798	0.3349	0.08536	60.53	78.3371	52.14	27.44	3.9038	1	1	0	0
1741	2015-02-19	20.6634	0.328	0.08394	60.21	76.9857	51.16	26.99	3.9108	0	0	0	0
1742	2015-02-20	21.1145	0.3314	0.08467	60.22	77.3988	50.34	27.75	3.9184	1	1	1	1
1743	2015-02-23	21.1795	0.332	0.08454	58.9	76.6155	49.45	27.73	3.9259	1	0	0	0
1744	2015-02-24	21.6567	0.3329	0.08492	58.66	76.9684	49.28	28.2	3.919	1	1	1	1
1745	2015-02-25	22.0904	0.3284	0.08433	61.63	77.1234	50.99	29.12	3.8942	0	0	1	1
1746	2015-02-26	21.9776	0.3318	0.08385	60.05	76.3057	48.17	28.61	3.957	1	0	0	0
1747	2015-02-27	22.3333	0.3275	0.0827	62.58	76.211	49.76	28.95	3.9613	0	0	0	1
1748	2015-03-02	21.8822	0.3275	0.0823	59.54	75.7806	49.59	28.36	3.9748	1	0	0	0
1749	2015-03-03	21.9342	0.324	0.08144	61.02	75.4191	50.52	28.5	3.9906	0	0	0	1
1750	2015-03-04	22.0297	0.324	0.08055	60.55	75.0404	51.53	28.18	4.0207	1	0	0	0
1751	2015-03-05	22.2292	0.3222	0.07986	60.48	74.6616	50.76	28.25	4.0307	0	0	0	1
1752	2015-03-06	22.6499	0.3187	0.07783	59.73	73.7062	49.61	28.44	4.0985	0	0	0	1
1753	2015-03-09	22.4938	0.3179	0.07762	58.53	73.3016	50	28.03	4.0917	0	0	0	0
1754	2015-03-10	21.4788	0.3171	0.07644	56.39	72.527	48.29	26.55	4.1555	0	0	0	0
1755	2015-03-11	21.4051	0.3179	0.0753	57.54	72.3204	48.17	26.02	4.2141	1	0	0	0
1756	2015-03-12	21.5699	0.323	0.07714	57.08	72.4925	47.05	26.54	4.177	1	1	1	1
1757	2015-03-13	21.1188	0.3196	0.07545	54.67	72.1913	44.84	25.57	4.2339	0	0	0	0
1758	2015-03-16	20.7198	0.3139	0.0749	53.44	72.9574	43.88	25.44	4.2012	0	0	1	0
1759	2015-03-17	20.646	0.3143	0.07491	53.51	72.372	43.46	25.36	4.194	1	1	0	0
1760	2015-03-18	20.7892	0.3107	0.07438	55.91	74.0849	44.66	26.01	4.0975	0	0	1	1
1761	2015-03-19	21.3227	0.3133	0.07529	54.43	72.6561	43.96	26.33	4.1524	1	1	0	1
1762	2015-03-20	21.9169	0.3074	0.07513	55.32	72.768	45.72	27.36	4.1014	0	0	1	1
1763	2015-03-23	21.8258	0.3141	0.07787	55.92	73.534	47.45	27.68	4.013	1	1	1	1
1764	2015-03-24	21.9689	0.3161	0.07835	55.11	72.7508	47.51	27.74	4.0345	1	1	0	1
1765	2015-03-25	22.0253	0.3118	0.07744	56.48	73.0434	49.21	27.92	4.0259	0	0	1	1
1766	2015-03-26	22.047	0.317	0.07777	59.19	72.5786	51.43	27.73	4.0707	1	1	0	0
1767	2015-03-27	22.034	0.3128	0.0771	56.41	71.9416	48.87	27.66	4.0627	0	0	0	0
1768	2015-03-30	22.355	0.3182	0.07818	56.29	73.7062	48.68	28.09	4.064	1	1	1	1
1769	2015-03-31	22.1728	0.3173	0.07713	55.11	73.1639	47.6	27.54	4.1126	0	0	0	0
1770	2015-04-01	22.6282	0.3144	0.07673	57.1	72.6991	50.09	28.15	4.104	0	0	0	1
1771	2015-04-02	22.5979	0.3144	0.07743	54.95	72.5614	49.14	28.48	4.0589	1	1	0	1
1772	2015-04-07	23.4523	0.3068	0.0754	59.1	73.8095	53.98	29.43	4.0811	0	0	1	1
1773	2015-04-08	23.396	0.31	0.07626	55.55	72.3548	50.42	29.33	4.0796	1	1	0	0
1774	2015-04-09	23.769	0.3179	0.07712	56.57	72.8627	50.79	29.44	4.1245	1	1	1	1
1775	2015-04-10	23.8818	0.3191	0.07663	57.87	73.6459	51.64	29.46	4.1564	1	0	1	1
1776	2015-04-14	24.528	0.3221	0.07778	58.43	74.5669	53.29	30.36	4.1406	1	1	1	1
1777	2015-04-15	24.6668	0.3257	0.07816	60.32	75.815	56.39	30.62	4.1431	1	1	1	1
1778	2015-04-16	24.6842	0.3312	0.0807	63.98	75.5138	56.71	30.65	4.0975	1	1	0	1
1779	2015-04-17	24.2895	0.3515	0.08558	63.45	74.8252	55.74	30.41	4.0946	1	1	0	0
1780	2015-04-20	24.6191	0.3407	0.08257	63.45	75.092	56.38	30.52	4.131	0	0	1	1
1781	2015-04-21	24.7492	0.3376	0.08182	62.08	74.7821	55.26	30.51	4.1344	0	0	0	0
1782	2015-04-22	24.7666	0.334	0.08101	62.73	75.2814	56.16	30.82	4.1239	0	0	1	1
1783	2015-04-23	24.9444	0.3397	0.08318	64.85	75.3502	57.74	31.36	4.083	1	1	1	1
1784	2015-04-24	25.2263	0.3411	0.08384	65.28	74.8596	57.15	31.82	4.0581	1	1	0	1
1785	2015-04-27	25.8466	0.3426	0.0847	64.83	74.894	56.99	32.54	4.0561	1	1	1	1
1786	2015-04-28	26.3411	0.3399	0.08512	64.64	75.574	57.06	33.49	3.988	0	1	1	1
1787	2015-04-29	25.916	0.3363	0.08513	65.84	75.6343	58.58	33.51	3.9639	0	1	1	1
1788	2015-04-30	25.8076	0.3423	0.08682	66.78	75.2039	59.63	33.5	3.9363	1	1	0	0
1789	2015-05-04	25.89	0.3467	0.08731	66.45	76.7016	58.93	33.46	3.9733	1	1	1	0
1790	2015-05-05	26.2933	0.349	0.08819	67.52	76.2712	60.4	33.97	3.9615	1	1	0	1
1791	2015-05-06	26.1068	0.3487	0.08881	67.77	75.9097	60.93	34.06	3.914	0	1	0	1
1792	2015-05-07	25.6904	0.3471	0.08805	65.54	75.4019	58.94	33.53	3.9448	0	0	0	0
1793	2015-05-08	26.3758	0.347	0.0876	65.39	76.5983	59.39	34.33	3.9642	0	0	1	1
1794	2015-05-11	26.4235	0.3449	0.08651	64.91	75.3139	59.25	34.13	3.9892	0	0	0	0
1795	2015-05-12	26.0765	0.3449	0.08679	66.86	75.5221	60.75	33.95	3.9833	1	1	1	0
1796	2015-05-13	26.315	0.3441	0.0877	66.81	75.1229	60.5	34.2	3.9291	0	1	0	1
1797	2015-05-15	26.3064	0.3395	0.08748	66.81	75.8085	59.69	34.68	3.8736	0	0	1	1
1798	2015-05-18	24.1203	0.338	0.08616	66.27	75.3746	59.43	31.68	3.9331	0	0	0	0
1799	2015-05-19	23.5825	0.338	0.08472	64.02	75.4961	57.26	30.28	3.9874	1	0	1	0
1800	2015-05-20	24.2591	0.343	0.0856	65.03	75.6176	58.98	31.1	4.0082	1	1	1	1
1801	2015-05-21	24.1203	0.3371	0.08438	66.54	75.687	60.72	29.5	4.0009	0	0	1	0
1802	2015-05-22	23.8601	0.3389	0.08394	65.37	75.0882	59.72	29	4.0449	1	0	0	0
1803	2015-05-26	23.448	0.3359	0.08209	63.72	74.0728	58.03	28.18	4.1002	0	0	0	0
1804	2015-05-27	23.4753	0.3351	0.08204	62.06	73.8645	57.51	28	4.0758	0	0	0	0
1805	2015-05-28	23.4344	0.3345	0.08226	62.58	73.8645	57.68	28.1	4.0591	0	1	1	1
1806	2015-05-29	23.5117	0.3416	0.08438	65.56	73.9426	60.3	28.49	4.0431	1	1	1	1
1807	2015-06-02	24.0347	0.3371	0.08485	65.49	73.8906	61.26	29.57	3.9809	0	1	0	1
1808	2015-06-05	23.5344	0.3309	0.08261	63.31	73.1442	59.13	28.69	4.0028	0	0	0	0
1809	2015-06-08	22.8159	0.3282	0.08246	62.69	73.6389	58.14	28.29	3.9606	0	0	1	0
1810	2015-06-09	22.7613	0.3281	0.0826	64.88	73.4045	60.14	28.07	3.9676	0	1	0	0
1811	2015-06-10	23.4525	0.3294	0.08335	65.7	73.9513	61.43	29.17	3.9453	1	1	1	1
1812	2015-06-11	22.784	0.3305	0.08322	65.11	73.8472	60.77	28.28	3.9641	1	0	0	0
1813	2015-06-16	22.1655	0.3237	0.08125	63.7	73.4913	59.97	27.32	3.982	0	0	0	0
1814	2015-06-17	22.3611	0.3252	0.0816	63.87	73.5347	59.92	27.84	3.9556	1	1	1	1
1815	2015-06-18	22.4111	0.3273	0.08294	64.26	74.1856	60.45	28.42	3.9501	1	1	1	1
1816	2015-06-22	22.9023	0.3318	0.08401	63.34	73.9166	59.68	28.57	3.9548	1	1	0	1
1817	2015-06-23	23.2661	0.3356	0.0838	64.45	73.8298	61.01	28.83	4.0085	1	0	0	1
1818	2015-06-24	23.2252	0.3415	0.08539	63.49	73.4913	60.27	28.65	3.9913	1	1	0	0
1819	2015-06-25	23.207	0.3436	0.08652	63.2	72.8404	59.7	28.52	3.9737	1	1	0	0
1820	2015-06-26	23.116	0.3453	0.08622	63.26	72.7797	59.63	28.18	3.9922	1	0	0	0
1821	2015-06-30	22.4475	0.3389	0.08437	63.59	72.2069	59.47	27.62	4.0164	0	0	0	0
1822	2015-07-01	22.1883	0.3435	0.08499	62.01	71.4866	56.96	26.89	4.0494	1	1	0	0
1823	2015-07-02	22.2929	0.3336	0.08265	62.07	72.1548	56.93	27.3	4.0403	0	0	1	1
1824	2015-07-06	21.6244	0.3371	0.0832	56.54	71.6254	52.53	26.24	4.0576	1	1	0	0
1825	2015-07-07	20.8831	0.3354	0.08183	56.85	71.9205	52.33	25.65	4.0711	0	0	1	0
1826	2015-07-08	21.4561	0.334	0.08225	57.05	71.1394	51.65	25.9	4.0491	0	1	0	1
1827	2015-07-09	22.2383	0.3356	0.08256	58.61	70.8183	52.78	26.75	4.0522	1	1	0	1
1828	2015-07-10	22.6476	0.3435	0.08597	58.73	71.3564	52.74	27.7	3.979	1	1	1	1
1829	2015-07-13	22.9523	0.3461	0.08625	57.85	71.53	52.2	27.8	4.0195	1	1	1	1
1830	2015-07-15	22.5703	0.3527	0.08709	57.05	71.825	51.41	27.23	4.0415	1	1	1	0
1831	2015-07-16	22.9523	0.3515	0.08651	57.51	71.9552	50.91	27.6	4.0601	0	0	1	1
1832	2015-07-17	22.8795	0.3508	0.08621	57.1	71.6948	50.89	27.32	4.0812	0	0	0	0
1833	2015-07-20	22.9659	0.3534	0.08684	56.65	70.9572	50.15	27.29	4.0753	1	1	0	0
1834	2015-07-21	22.8295	0.3525	0.08747	57.04	70.8704	50.36	27.31	4.037	0	1	0	1
1835	2015-07-22	22.402	0.3512	0.08664	56.13	70.9832	49.19	27.02	4.0465	0	0	1	0
1836	2015-07-23	22.5157	0.3494	0.08682	55.27	70.4191	48.45	27.07	4.0259	0	1	0	1
1837	2015-07-24	22.443	0.3507	0.08708	54.62	69.3776	48.14	26.98	4.0258	1	1	0	0
1838	2015-07-27	21.8563	0.3533	0.08889	53.47	68.7875	47.39	26.52	3.9802	1	1	0	0
1839	2015-07-28	21.6107	0.3516	0.08799	53.3	71.582	47.98	26.2	3.9924	0	0	1	0
1840	2015-07-29	21.8245	0.3507	0.0876	53.38	72.1548	48.79	26.6	4.0198	0	0	1	1
1841	2015-07-30	21.9836	0.3519	0.08717	53.31	72.042	48.52	26.43	4.0268	1	0	0	0
1842	2015-07-31	22.0337	0.3525	0.08799	52.21	68.7441	47.12	26.8	4.0136	1	1	0	1
1843	2015-08-03	21.5652	0.3463	0.0861	49.52	67.746	45.17	25.88	4.0267	0	0	0	0
1844	2015-08-04	21.5016	0.3462	0.08604	49.99	66.9736	45.74	25.91	4.0523	0	0	0	1
1845	2015-08-05	21.638	0.3462	0.08537	49.59	66.9736	45.15	26.06	4.042	1	0	1	1
1846	2015-08-06	21.4425	0.3419	0.08467	49.52	67.7721	44.66	25.83	4.0373	0	0	1	0
1847	2015-08-07	21.6744	0.3416	0.08489	48.61	66.6786	43.87	26.3	4.0209	0	1	0	1
1848	2015-08-11	21.1105	0.3485	0.08699	49.18	67.8806	43.08	25.79	3.9973	1	1	1	0
1849	2015-08-12	21.638	0.3469	0.08783	49.66	69.0194	43.3	26.68	3.9515	0	1	1	1
1850	2015-08-13	21.7199	0.3462	0.0874	49.22	68.8967	42.23	26.56	3.9571	0	0	0	0
1851	2015-08-14	21.829	0.3481	0.08759	49.03	68.6427	42.5	26.62	3.9862	1	1	0	1
1852	2015-08-18	22.0109	0.3408	0.08485	48.81	68.2397	42.62	26.5	4.0157	0	0	0	0
1853	2015-08-19	21.588	0.3381	0.08438	47.16	66.7768	40.8	26.42	3.9851	0	0	0	0
1854	2015-08-20	21.2424	0.3353	0.08486	46.62	65.3227	41.14	26.08	3.9356	0	1	0	0
1855	2015-08-21	20.683	0.3327	0.08504	45.46	63.1853	40.45	25.77	3.8899	0	1	0	0
1856	2015-08-24	19.2414	0.304	0.07893	42.69	60.1981	38.24	24.28	3.8243	0	0	0	0
1857	2015-08-25	19.6234	0.3146	0.08109	43.21	60.1894	39.31	24.65	3.849	1	1	0	1
1858	2015-08-26	19.7507	0.3148	0.08064	43.14	63.5094	38.6	25.3	3.9274	1	0	1	1
1859	2015-08-27	20.5329	0.3166	0.08013	47.56	65.568	42.56	25.78	3.9466	1	0	1	1
1860	2015-08-28	27.6456	0.3121	0.07883	50.05	65.7607	45.22	25.83	3.9617	0	0	1	1
1861	2015-08-31	20.7739	0.3103	0.07845	54.15	65.9096	49.2	25.73	3.9518	0	0	1	0
1862	2015-09-01	20.4829	0.3103	0.07878	49.56	63.1415	45.41	25.41	3.9228	1	1	0	0
1863	2015-09-02	20.5011	0.3076	0.07787	50.5	64.1489	46.25	25.57	3.9517	0	0	1	1
1864	2015-09-03	20.8786	0.3121	0.07845	50.68	64.6394	46.75	25.51	3.9756	1	1	1	0
1865	2015-09-04	20.2964	0.3137	0.07899	49.61	63.4744	46.05	24.93	3.9719	1	1	0	0
1866	2015-09-08	20.1646	0.3107	0.07854	49.52	64.3854	45.94	25.11	3.9506	0	0	1	1
1867	2015-09-09	20.2009	0.3121	0.07877	47.58	63.0714	44.15	24.7	3.9439	1	1	0	0
1868	2015-09-10	19.7234	0.3103	0.07921	48.89	63.5269	45.92	24.65	3.9109	0	1	1	0
1869	2015-09-11	19.5552	0.3071	0.07883	48.14	63.6758	44.63	24.45	3.8965	0	0	1	0
1870	2015-09-14	19.5825	0.3133	0.08029	46.37	63.5006	44	24.34	3.903	1	1	0	0
1871	2015-09-15	19.9053	0.3103	0.07923	46.63	63.8247	44.59	24.79	3.9212	0	0	1	1
1872	2015-09-16	20.4283	0.3099	0.0793	49.75	65.0862	47.15	25.26	3.9187	0	1	1	1
1873	2015-09-17	20.5739	0.3103	0.07929	49.08	65.2263	46.9	25.78	3.8673	1	0	1	1
1874	2015-09-18	19.8644	0.3071	0.07892	47.47	63.6671	44.68	24.89	3.9119	0	0	0	0
1875	2015-09-21	19.869	0.3103	0.07872	48.92	64.289	46.68	24.32	3.9486	1	0	1	0
1876	2015-09-22	19.5279	0.3071	0.07725	49.08	63.7196	45.83	24.1	3.9767	0	0	0	0
1877	2015-09-23	19.5415	0.3085	0.078	47.75	63.3342	44.48	23.98	3.9523	1	1	0	0
1878	2015-09-24	19.2232	0.3062	0.078	48.17	63.7109	44.91	23.87	3.932	0	1	1	0
1879	2015-09-25	19.5097	0.3107	0.07881	48.6	64.1489	45.7	23.97	3.9386	1	1	1	1
1880	2015-09-28	19.1095	0.3058	0.07788	47.34	63.597	44.43	23.42	3.9279	0	0	0	0
1881	2015-09-29	19.3323	0.3053	0.0779	48.23	63.9211	45.23	23.67	3.931	0	1	1	1
1882	2015-09-30	19.7644	0.3013	0.07622	48.37	65.13	45.09	24.16	3.9539	0	0	1	1
1883	2015-10-01	20.0782	0.2995	0.07597	47.69	64.8759	44.74	24.98	3.9429	0	0	0	1
1884	2015-10-02	20.6148	0.2986	0.07597	48.13	66.4702	45.54	25.81	3.9394	0	1	1	1
1885	2015-10-05	21.2333	0.3013	0.07635	49.25	67.2849	46.26	26.14	3.9436	1	1	1	1
1886	2015-10-06	21.92	0.2963	0.07557	51.92	68.231	48.53	27.07	3.9192	0	0	1	1
1887	2015-10-07	22.1655	0.2986	0.07602	51.33	69.3785	47.81	27.92	3.931	1	1	1	1
1888	2015-10-08	22.3656	0.3017	0.07708	53.05	70.1056	49.43	27.54	3.9135	1	1	1	0
1889	2015-10-09	22.8477	0.3071	0.07919	52.65	69.4311	49.63	28.27	3.8889	1	1	0	1
1890	2015-10-12	22.7158	0.308	0.07942	49.86	69.4661	47.1	28.3	3.8865	1	1	1	1
1891	2015-10-13	22.3793	0.3004	0.07748	49.24	69.3435	46.66	27.8	3.8791	0	0	0	0
1892	2015-10-14	22.5339	0.2968	0.07692	49.15	70.2195	46.64	28.74	3.85	0	0	1	1
1893	2015-10-15	22.6703	0.2995	0.07726	48.71	71.3758	46.38	28.64	3.879	1	1	1	0
1894	2015-10-16	23.1615	0.2995	0.07717	50.46	72.2518	47.26	29	3.894	1	0	1	1
1895	2015-10-19	22.5021	0.299	0.07652	48.61	70.9465	45.89	27.96	3.9043	0	0	0	0
1896	2015-10-20	22.5885	0.2977	0.07632	48.71	70.8064	45.55	28.04	3.9014	0	0	0	1
1897	2015-10-21	22.6567	0.2968	0.07602	47.85	70.2633	45.2	28.2	3.9047	0	0	0	1
1898	2015-10-22	23.0387	0.2959	0.07446	48.08	72.6109	45.38	28.31	3.9846	0	0	1	1
1899	2015-10-23	23.0705	0.2963	0.07358	47.99	72.6898	44.6	28.21	4.0259	1	0	1	0
1900	2015-10-27	21.7199	0.2878	0.07156	46.81	71.0342	43.2	26.45	4.0189	0	0	0	0
1901	2015-10-28	21.9927	0.2882	0.07192	49.05	72.0766	45.94	26.42	4.06	1	1	1	0
1902	2015-10-29	22.0155	0.2923	0.0722	48.8	72.0328	46.06	26.59	4.0423	1	1	0	1
1903	2015-10-30	22.0109	0.2918	0.07245	49.56	72.4795	46.59	26.97	4.0277	0	1	1	1
1904	2015-11-02	22.2474	0.2909	0.07232	48.79	74.7046	46.14	27.18	4.0213	0	0	1	1
1905	2015-11-03	22.8159	0.2896	0.07157	50.54	76.0799	47.9	27.73	4.0424	0	0	1	1
1906	2015-11-04	23.2388	0.2932	0.07156	48.58	75.3178	46.32	27.73	4.0923	1	0	0	1
1907	2015-11-05	23.1297	0.2923	0.07125	47.98	74.2928	45.2	27.86	4.0951	0	0	0	1
1908	2015-11-06	23.5617	0.2909	0.07005	47.42	73.995	44.29	27.95	4.15	0	0	0	1
1909	2015-11-09	23.3525	0.2842	0.06854	47.19	72.4133	43.87	27.9	4.1485	0	0	0	0
1910	2015-11-10	23.4525	0.2846	0.06855	47.44	72.7668	44.21	27.79	4.1454	1	1	1	0
1911	2015-11-11	23.3252	0.2815	0.06805	45.81	72.1217	42.93	27.52	4.1302	0	0	0	0
1912	2015-11-12	22.7249	0.2837	0.06882	44.06	70.1689	41.75	27	4.1038	1	1	0	0
1913	2015-11-13	22.4248	0.2936	0.07088	43.61	69.0113	40.74	26.68	4.1296	1	1	0	0
1914	2015-11-16	22.684	0.2833	0.06826	44.56	71.4855	41.74	26.95	4.1536	0	0	1	1
1915	2015-11-17	23.1206	0.2792	0.06696	43.57	70.6549	40.67	27.11	4.1719	0	0	0	1
1916	2015-11-18	23.8255	0.2747	0.06577	44.14	71.3441	40.75	28.22	4.1694	0	0	1	1
1917	2015-11-19	24.0847	0.2698	0.06512	44.18	70.9553	40.54	28.5	4.1404	0	0	0	1
1918	2015-11-20	23.8846	0.2725	0.06522	44.66	70.5047	40.39	28.14	4.1806	1	1	0	0
1919	2015-11-23	23.8346	0.2788	0.06656	44.83	70.9377	41.75	27.88	4.1833	1	1	1	0
1920	2015-11-24	23.9437	0.2752	0.06586	46.12	72.3515	42.87	28.23	4.1816	0	0	1	1
1921	2015-11-25	23.8982	0.2774	0.06631	46.17	71.7948	43.04	28.04	4.184	1	1	0	0
1922	2015-11-27	24.2166	0.2725	0.06489	44.86	71.7771	41.71	28.05	4.2012	0	0	0	1
1923	2015-12-02	24.6259	0.268	0.06363	42.49	70.2926	39.94	28.75	4.2046	0	0	0	1
1924	2015-12-03	24.1938	0.2698	0.06581	43.84	69.2853	41.08	29.23	4.0835	1	1	0	1
1925	2015-12-04	23.4162	0.2689	0.06517	43	69.6829	39.97	28.09	4.1204	0	0	1	0
1926	2015-12-07	23.0569	0.2779	0.06729	40.73	67.8626	37.65	27.35	4.1338	1	1	0	0
1927	2015-12-09	23.1115	0.2698	0.06612	40.11	66.8288	37.16	27.6	4.0778	0	0	0	1
1928	2015-12-10	23.8346	0.2698	0.06538	39.73	66.8818	36.76	28.76	4.1281	1	0	1	1
1929	2015-12-11	23.0342	0.2671	0.06493	37.93	65.6889	35.62	27.51	4.1155	0	0	0	0
1930	2015-12-14	22.1565	0.263	0.06426	37.92	67.1822	36.31	26.93	4.1009	0	0	1	0
1931	2015-12-15	23.2888	0.2635	0.06403	38.45	70.1866	37.35	27.93	4.1135	1	0	1	1
1932	2015-12-16	23.83	0.2608	0.0631	37.19	69.9392	35.52	28.9	4.1253	0	0	0	1
1933	2015-12-17	23.0433	0.2603	0.06235	37.06	68.8876	34.95	27.41	4.17	0	0	0	0
1934	2015-12-18	23.2297	0.2621	0.06304	36.88	68.2868	34.73	27.47	4.1494	1	1	0	1
1935	2015-12-21	22.8932	0.2711	0.06556	36.35	68.2691	34.74	27.62	4.1335	1	1	0	1
1936	2015-12-22	23.3752	0.2702	0.06557	36.11	68.6137	36.14	28.41	4.1247	0	1	1	1
1937	2015-12-23	24.0665	0.268	0.06445	37.36	70.8581	37.5	28.91	4.1475	0	0	1	1
1938	2015-12-28	23.83	0.2653	0.06433	36.62	69.5769	36.81	29.08	4.1275	0	0	0	1
1939	2015-12-29	23.6799	0.2653	0.06388	37.79	69.948	37.87	28.7	4.1565	1	0	1	0
1940	2015-12-30	23.7663	0.2608	0.06283	36.46	69.0202	36.6	28.47	4.1415	0	0	0	0
1941	2016-01-04	23.2888	0.2621	0.06266	37.22	68.4458	36.76	27.85	4.1771	1	0	0	0
1942	2016-01-05	23.548	0.2608	0.06205	36.42	69.029	35.97	27.72	4.2033	0	0	1	0
1943	2016-01-07	23.0796	0.25	0.05995	33.75	67.359	33.27	27.55	4.1444	0	0	0	0
1944	2016-01-08	21.4879	0.2482	0.05972	33.55	65.9982	33.16	25.79	4.1445	0	0	0	0
1945	2016-01-11	21.2924	0.2464	0.05913	31.55	65.1145	31.41	25.48	4.1743	0	0	0	0
1946	2016-01-12	21.0423	0.2464	0.059	30.86	66.4488	30.44	25.25	4.173	1	0	1	0
1947	2016-01-13	21.065	0.246	0.05885	30.31	66.8465	30.48	25.02	4.1693	0	0	1	0
1948	2016-01-14	21.0968	0.2383	0.05712	31.03	69.9127	31.2	25.38	4.1735	0	0	1	1
1949	2016-01-15	20.21	0.232	0.05592	28.94	68.5519	29.42	24	4.1575	0	0	0	0
1950	2016-01-19	20.1373	0.2185	0.05269	28.76	67.5092	28.46	23.82	4.1563	0	0	0	0
1951	2016-01-20	19.5097	0.2185	0.05263	27.88	64.6639	26.55	23.48	4.1617	1	0	0	0
1952	2016-01-21	19.7462	0.2248	0.05383	29.25	65.4768	29.53	23.23	4.164	1	1	1	0
1953	2016-01-22	20.4374	0.2253	0.05375	32.18	67.6594	32.19	24.3	4.1979	1	0	1	1
1954	2016-01-25	20.6512	0.2221	0.05311	30.5	65.3708	30.34	23.39	4.1742	0	0	0	0
1955	2016-01-26	20.9149	0.2194	0.0525	31.8	67.7743	31.45	24.92	4.1683	0	0	1	1
1956	2016-01-27	21.0241	0.2203	0.05275	33.1	66.5283	32.3	24.95	4.1688	1	1	0	1
1957	2016-01-28	21.3697	0.2217	0.05341	33.89	68.0305	33.22	25.48	4.1524	1	1	1	1
1958	2016-01-29	21.5152	0.223	0.05318	34.74	68.7904	33.62	25.65	4.1882	1	0	1	1
1959	2016-02-01	21.2287	0.2208	0.05316	34.24	67.412	31.62	25.44	4.1542	0	0	0	0
1960	2016-02-02	20.7012	0.2158	0.05214	32.72	65.9098	29.88	24.69	4.1364	0	0	0	0
1961	2016-02-03	20.8922	0.2122	0.05204	35.04	69.3471	32.28	25.54	4.0656	0	0	1	1
1962	2016-02-04	21.3833	0.2176	0.05406	34.46	70.54	31.72	26.16	4.024	1	1	1	1
1963	2016-02-05	21.5834	0.2176	0.05396	34.06	70.7609	30.89	26.23	4.0281	1	0	1	1
1964	2016-02-08	21.2242	0.2131	0.05308	32.88	71.7152	29.69	25.77	4.0018	0	0	1	0
1965	2016-02-09	20.4511	0.2113	0.05324	30.32	71.4032	27.94	25.47	3.9752	0	1	0	0
1966	2016-02-10	20.0827	0.205	0.05139	30.84	70.7523	27.45	24.59	3.9653	0	0	0	0
1967	2016-02-11	19.5233	0.1969	0.04984	30.06	70.9752	26.21	24.21	3.9525	0	0	1	0
1968	2016-02-12	21.3288	0.1938	0.04869	33.36	72.2502	29.44	25.97	3.9771	0	0	1	1
1969	2016-02-16	21.6471	0.1956	0.04883	32.18	72.4197	29.04	26.55	4.0026	1	1	1	1
1970	2016-02-17	22.3566	0.1956	0.04889	34.5	73.1151	30.66	27.31	4.0084	1	1	1	1
1971	2016-02-22	21.9882	0.2095	0.05164	34.69	73.4629	31.48	26.27	4.0563	1	1	1	0
1972	2016-02-23	21.2833	0.2158	0.05315	33.27	72.4286	31.87	25.1	4.0613	1	1	0	0
1973	2016-02-24	21.1241	0.2104	0.05177	34.41	72.6871	32.15	25.89	4.0611	0	0	1	1
1974	2016-02-25	21.0923	0.2158	0.05332	35.29	73.1241	33.07	24.8	4.0528	1	1	1	0
1975	2016-02-26	21.6289	0.2235	0.05466	35.1	72.8922	32.78	25.14	4.084	1	1	0	1
1976	2016-02-29	21.9927	0.2127	0.05174	35.97	71.4656	33.75	25.03	4.1139	0	0	0	0
1977	2016-03-01	22.1928	0.2181	0.05298	36.81	72.4732	34.4	25.65	4.1125	1	1	1	1
1978	2016-03-03	22.6294	0.2176	0.05338	37.07	73.4718	34.57	27.36	4.0723	0	1	1	1
1979	2016-03-04	22.734	0.2181	0.05376	38.72	73.3737	35.92	27.69	4.0535	1	1	0	1
1980	2016-03-08	22.875	0.2347	0.05793	39.65	73.6769	36.5	28.02	4.0555	1	1	1	1
1981	2016-03-09	23.4662	0.2325	0.05745	41.07	73.4718	38.29	28.56	4.056	0	0	0	1
1982	2016-03-17	23.9846	0.2275	0.05753	41.54	74.9876	40.2	29.17	3.955	0	1	1	1
1983	2016-03-22	23.4753	0.2221	0.05579	41.79	75.0054	41.45	27.78	3.9794	0	0	1	0
1984	2016-03-29	22.252	0.2163	0.05456	39.14	75.371	38.28	26.2	3.9549	0	0	1	0
1985	2016-03-30	23.0296	0.2149	0.05447	39.26	75.3621	38.32	27.92	3.9394	0	0	0	1
1986	2016-04-08	22.02	0.2113	0.05394	41.94	74.194	39.72	27.2	3.9173	0	0	0	0
1987	2016-04-12	22.4384	0.2122	0.05401	44.69	75.2105	42.17	27.65	3.9242	1	1	1	1
1988	2016-04-13	22.9296	0.2145	0.05414	44.18	75.6385	41.76	28.1	3.9647	1	1	1	1
1989	2016-04-14	23.1024	0.2136	0.05378	43.84	76.1735	41.5	28.93	3.9688	0	0	1	1
1990	2016-04-19	23.1933	0.2086	0.05295	44.03	76.869	41.08	28.64	3.9444	0	0	1	0
1991	2016-04-21	23.3752	0.2082	0.05252	44.53	77.3861	43.18	29	3.9707	0	0	1	1
1992	2016-04-27	23.8891	0.2086	0.05294	47.18	78.8752	45.33	29.55	3.9414	1	1	1	1
1993	2016-05-11	22.9296	0.2068	0.05262	47.6	79.8528	46.23	28.54	3.9308	0	0	1	0
1994	2016-05-12	23.4525	0.2064	0.05226	48.08	80.626	46.7	29.23	3.9527	0	0	1	1
1995	2016-05-13	23.4207	0.2068	0.05202	47.83	79.7179	46.21	28.81	3.9722	1	0	0	0
1996	2016-05-17	23.5708	0.2059	0.05201	49.28	80.5002	48.31	29.38	3.9636	0	0	1	1
1997	2016-05-20	23.3116	0.205	0.05092	48.72	80.689	47.75	28.05	4.0195	0	0	1	0
1998	2016-05-25	23.921	0.2068	0.05123	49.74	81.1565	49.56	28.24	4.0366	1	1	1	1
[truncated: 538 more rows]
